# Supplementary material for: Ligand-free palladium-catalyzed synthesis of 3-(2,2-dialkyl-2 H -chromen-4-yl)-2-phenylimidazo[1,2- a ]pyridine derivatives: molecular docking investigation of their potential as DNA gyrase inhibitors and evaluation of their antibacterial activities
Source: Royal Society of Chemistry journal article supplement (doi:10.1039/d4ra09092f), 2025-01-01
Supplement: d4ra09092f1.pdf [file d4ra09092f1.pdf]

# Supporting information

## Ligand-free Palladium-catalyzed synthesis of 3-(2,2-dialkyl-2*H*-chromen-4-yl)-2-phenylimidazo[1,2-*a*]pyridine derivatives and evaluation of their antibacterial activity with molecular docking investigation as DNA gyrase inhibitors

Rudra Narayan Mishra,<sup>a</sup> Mohammed Ansar Ahemad,<sup>a</sup> Jasmine Panda,<sup>a</sup> Sabita Nayak,<sup>a\*</sup> Seetaram Mohapatra,<sup>a</sup> Chita Ranjan Sahoo<sup>b</sup>

<sup>a</sup>*Organic Synthesis Laboratory, Department of Chemistry, Ravenshaw University, Cuttack-753003, Odisha, India*

<sup>b</sup>*ICMR-Regional Medical Research Centre, Department of Health Research, Ministry of Health & Family Welfare, Govt. of India, Bhubaneswar-751023, Odisha, India*

*\*Corresponding Author*

Email: [sabitanayak18@gmail.com](mailto:sabitanayak18@gmail.com)

## Contents

1. **Fig S1-S63:** <sup>1</sup>H, <sup>13</sup>C NMR and HRMS spectra of synthesized compounds **16(a-u)**
2. **Fig S64-S84:** Molecular docking studies of **16(a-u)** derivatives with *E. coli* DNA gyrase (PDB ID: 1AJ6)
3. **Fig S85-S105:** Molecular docking studies of **16(a-u)** derivatives with *S. aureus* DNA gyrase (PDB ID: 3G7B)

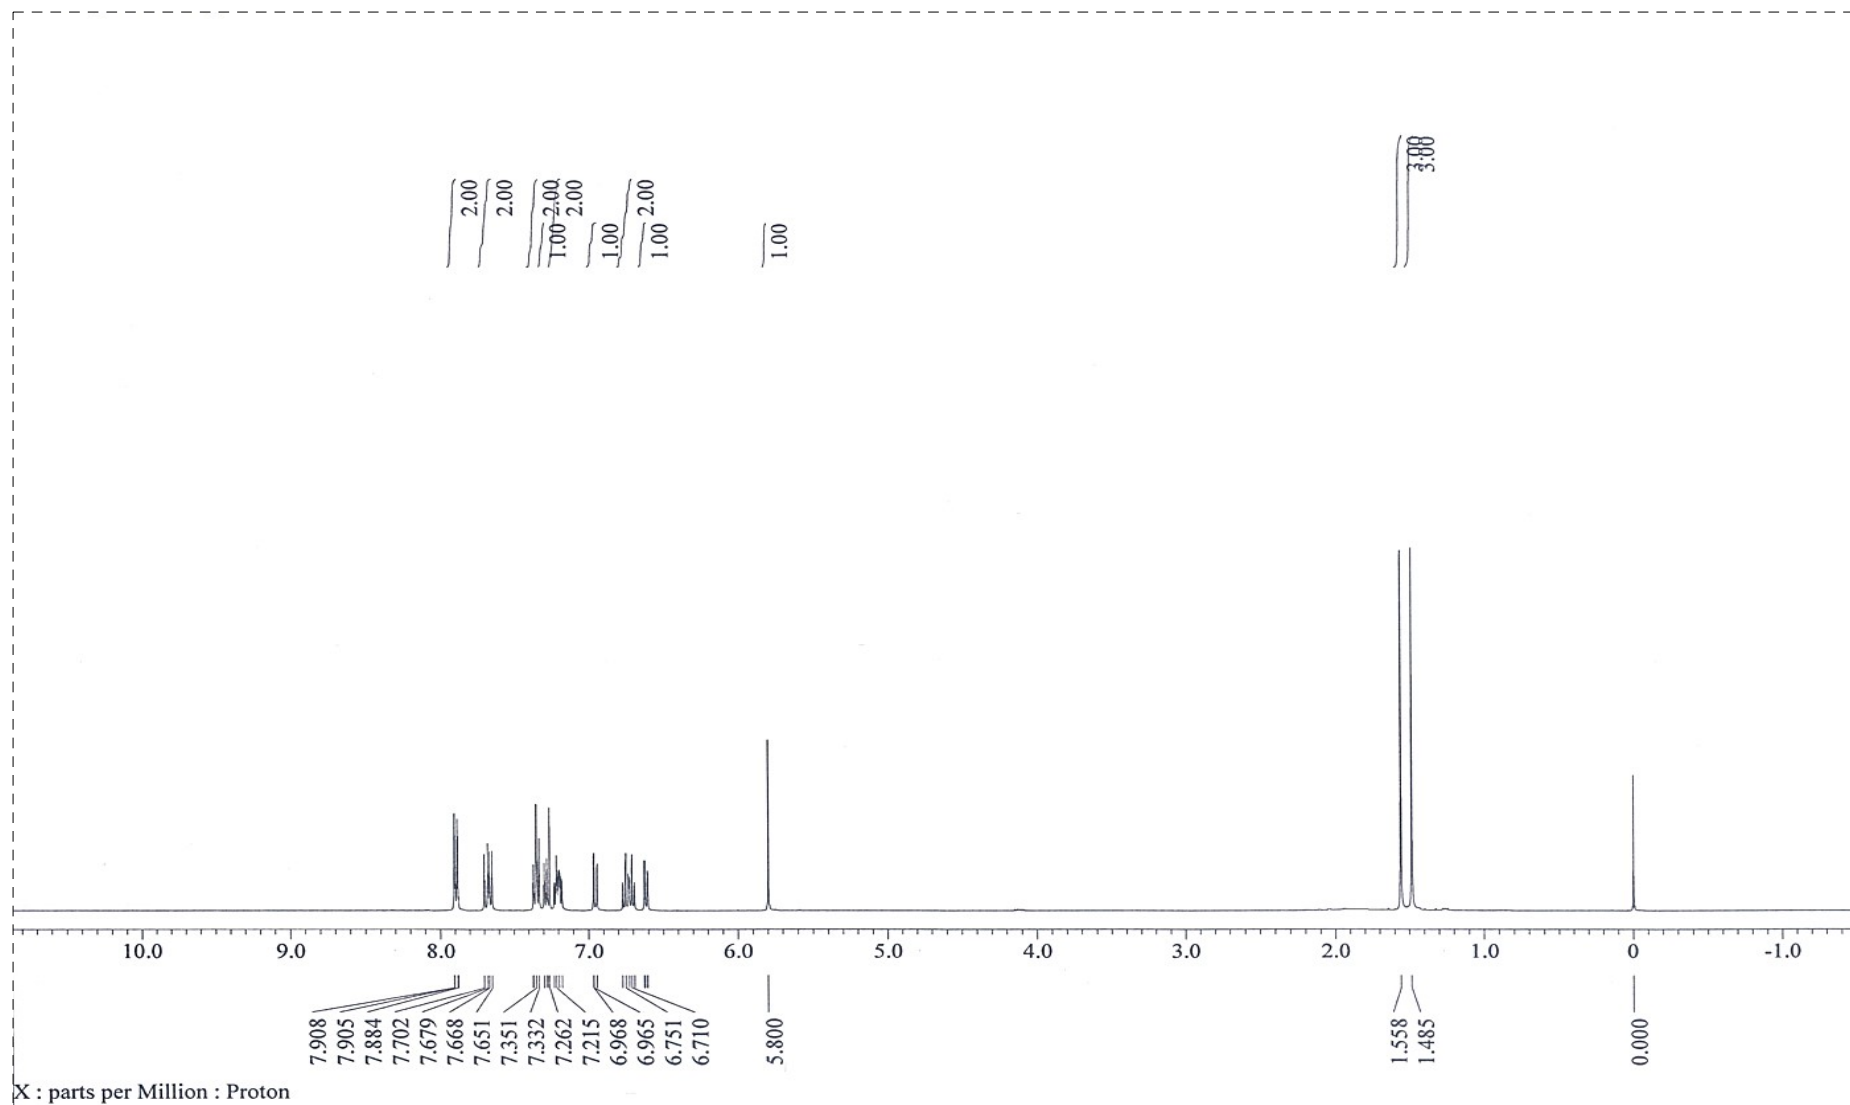

**Fig S1:**  $^1\text{H}$  NMR of 3-(2, 2-dimethyl-2H-chromen-4-yl)-2-phenylimidazo-[1,2-a]pyridine (**16a**)

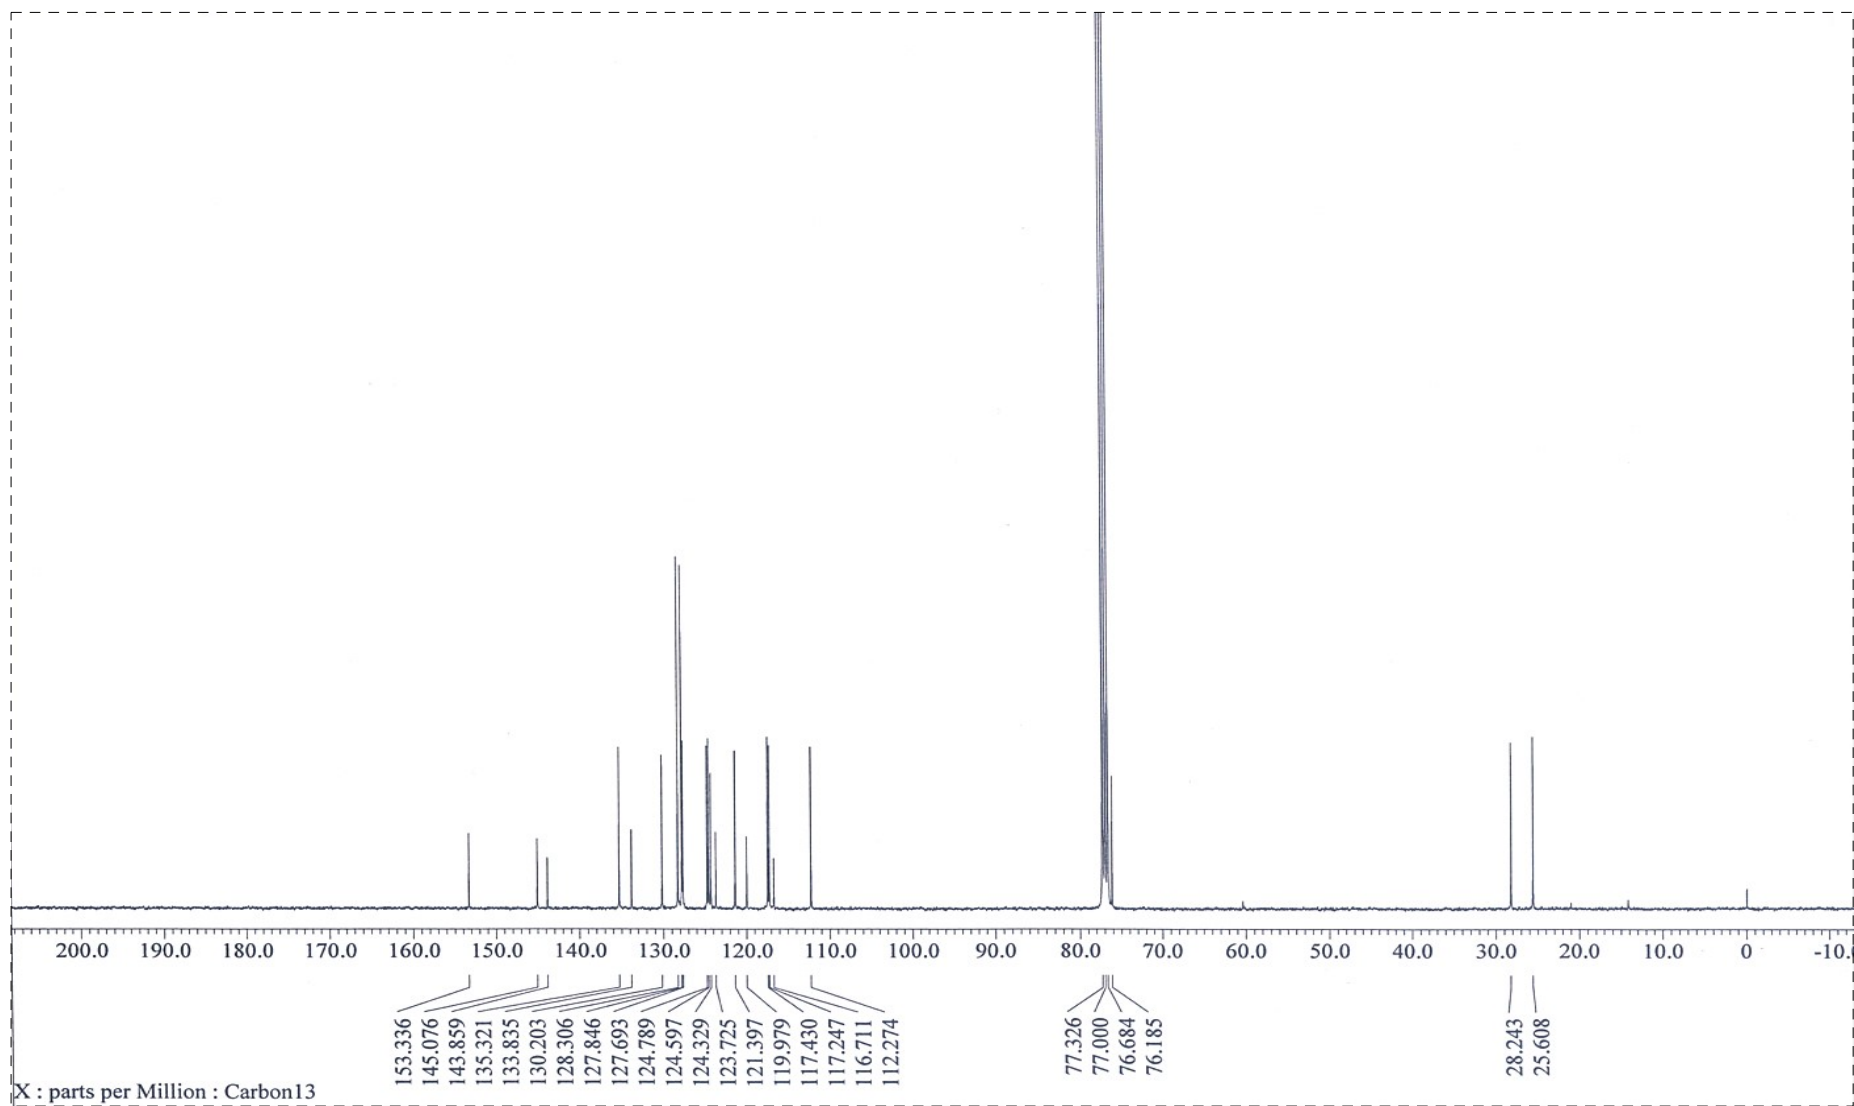

**Fig S2:**  $^{13}\text{C}$  NMR of 3-(2, 2-dimethyl-2H-chromen-4-yl)-2-phenylimidazo-[1,2-a]pyridine (**16a**)

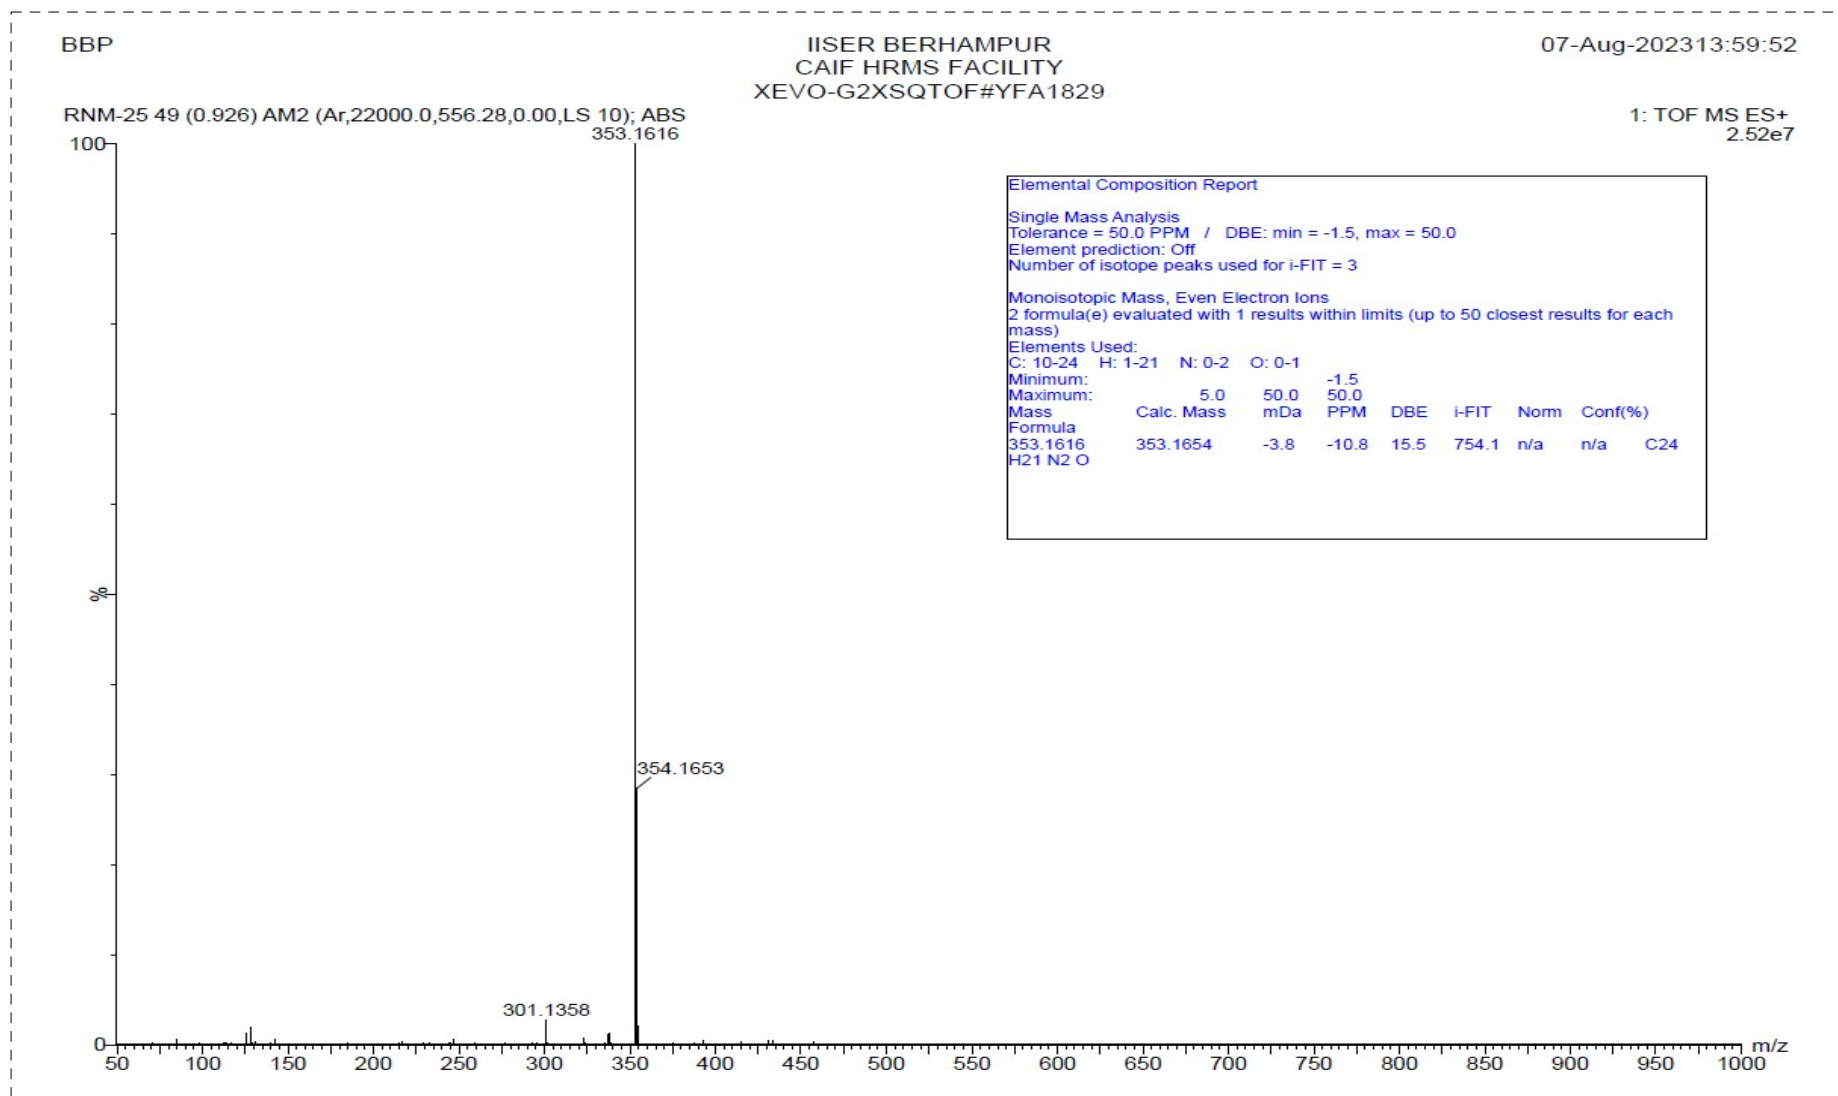

**Fig S3:** HR-MS of 3-(2, 2-dimethyl-2H-chromen-4-yl)-2-phenylimidazo-[1,2-a]pyridine (**16a**)

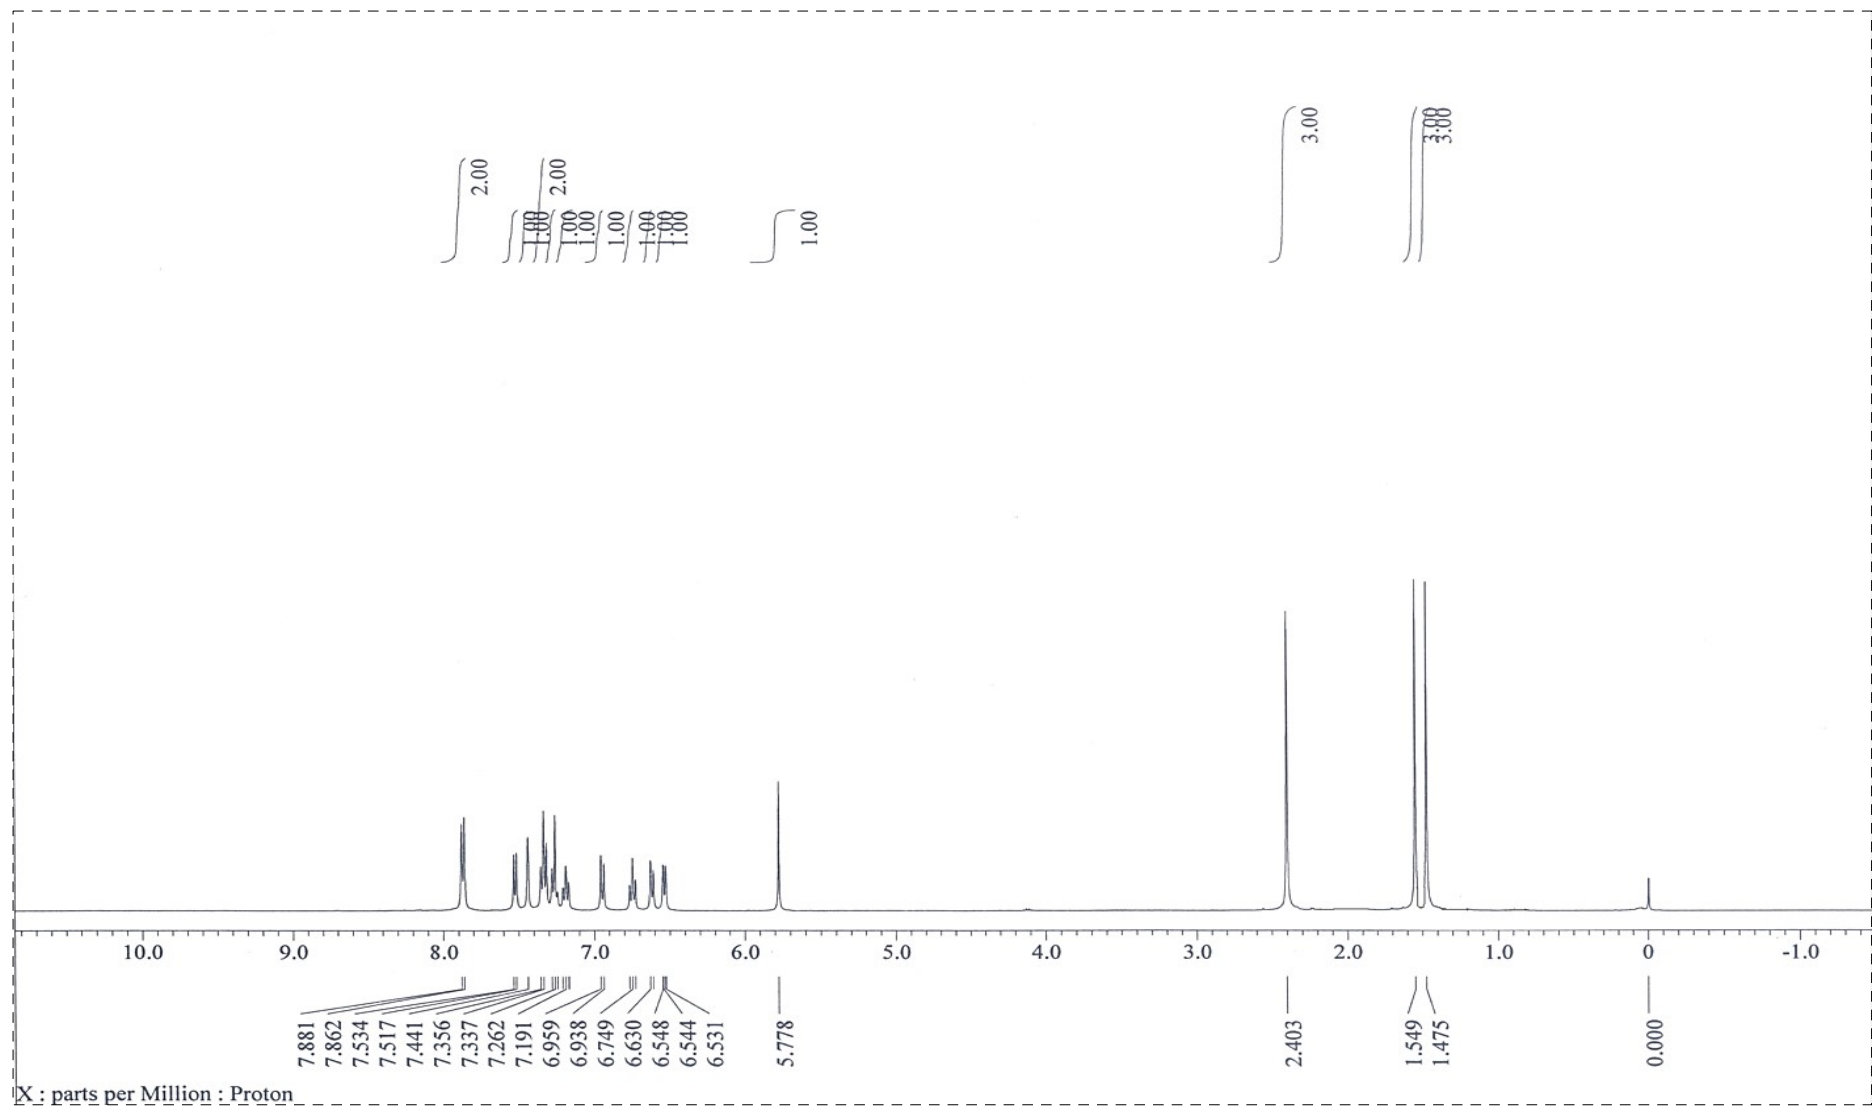

**Fig S4:** <sup>1</sup>H NMR of 3-(2, 2-dimethyl-2H-chromen-4-yl)-7-methyl-2-phenylimidazo-[1,2-a]pyridine (16b)

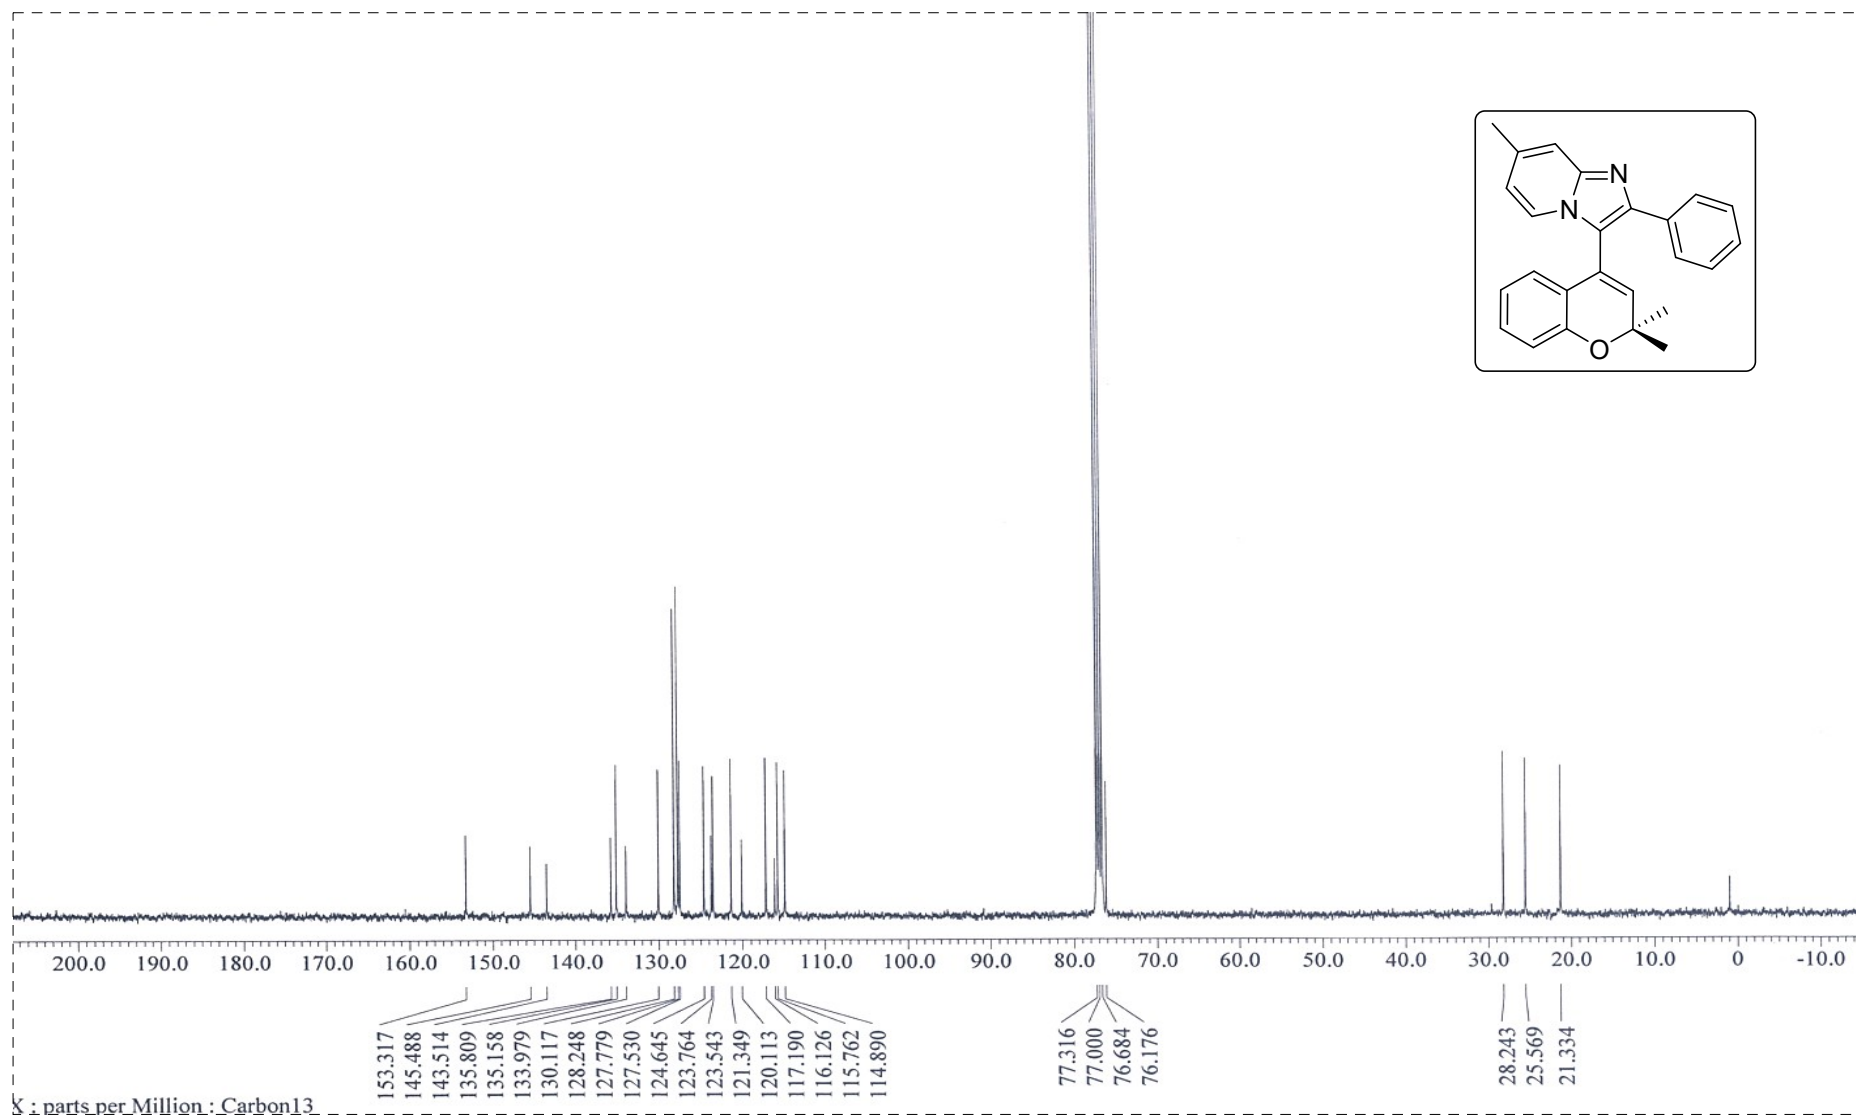

**Fig S5:**  $^{13}\text{C}$  NMR of 3-(2, 2-dimethyl-2H-chromen-4-yl)-7-methyl-2-phenylimidazo-[1,2-a]pyridine (**16b**)

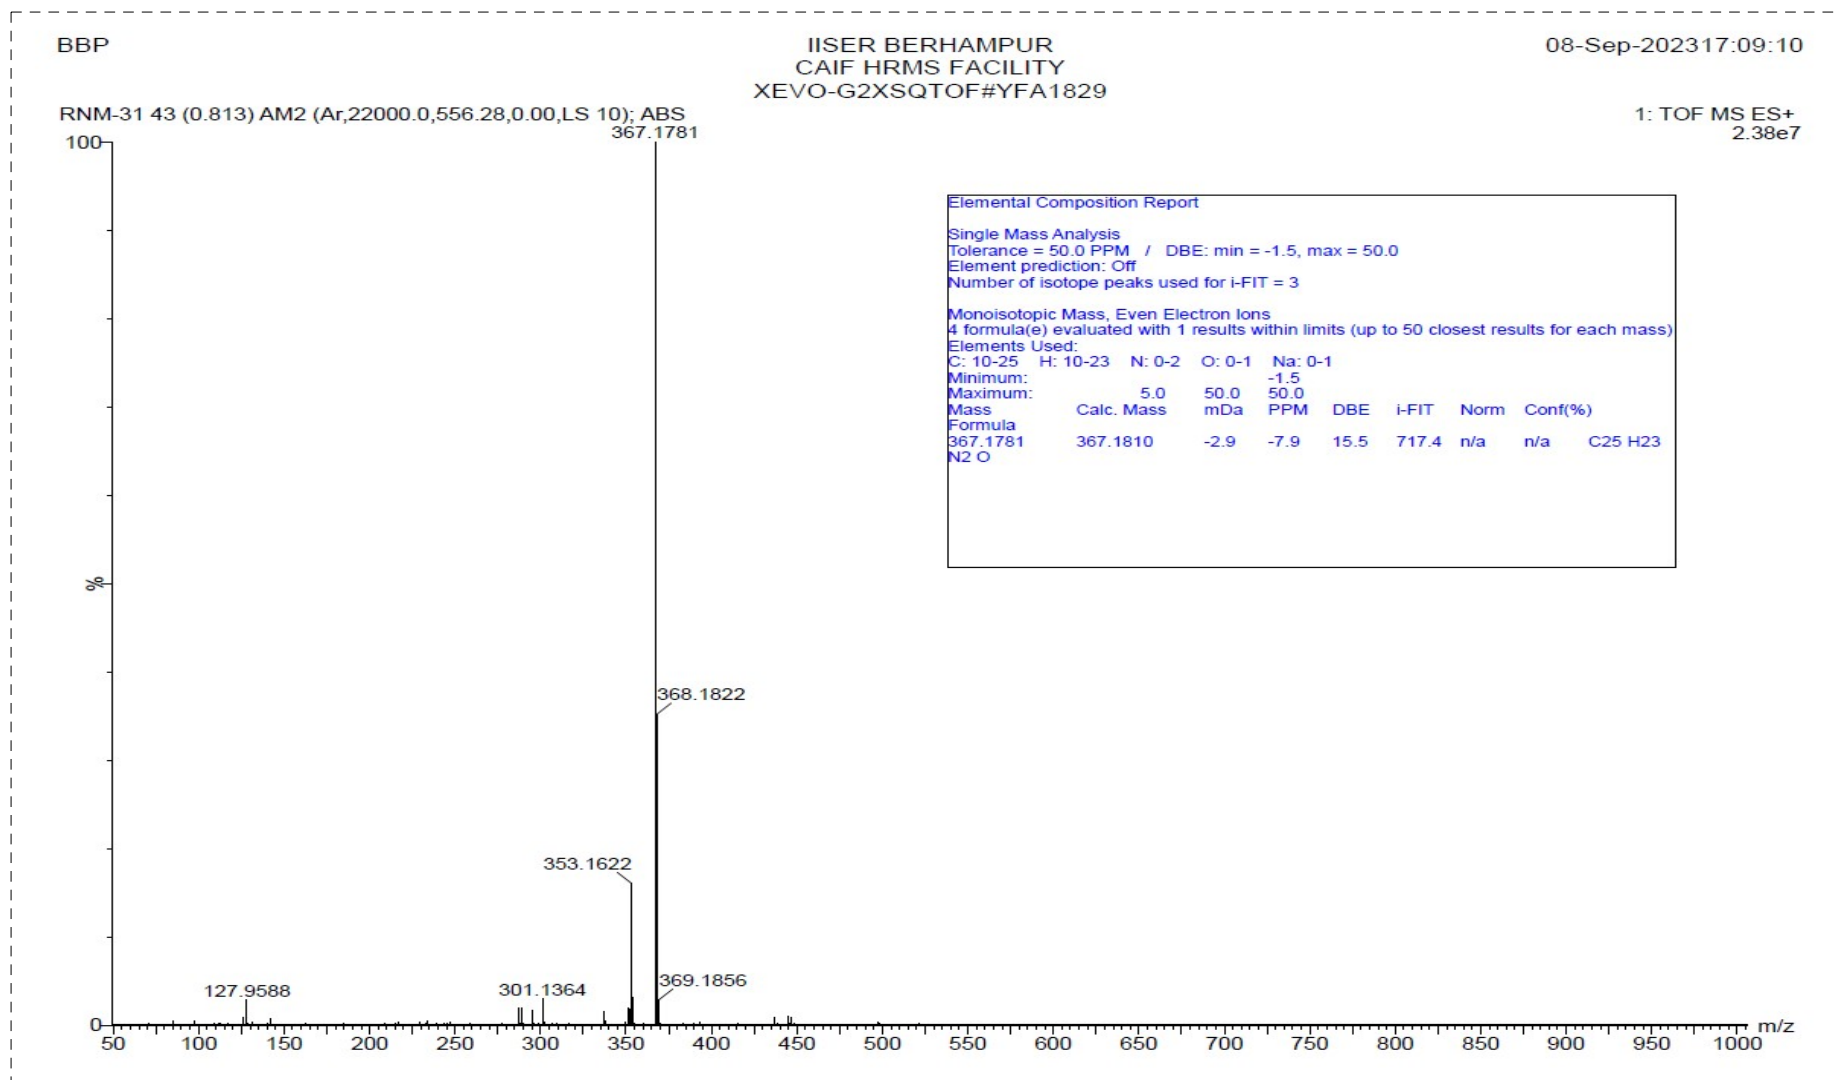

**Fig S6:** HR-MS of 3-(2, 2-dimethyl-2H-chromen-4-yl)-7-methyl-2-phenylimidazo-[1,2-a]pyridine (**16b**)

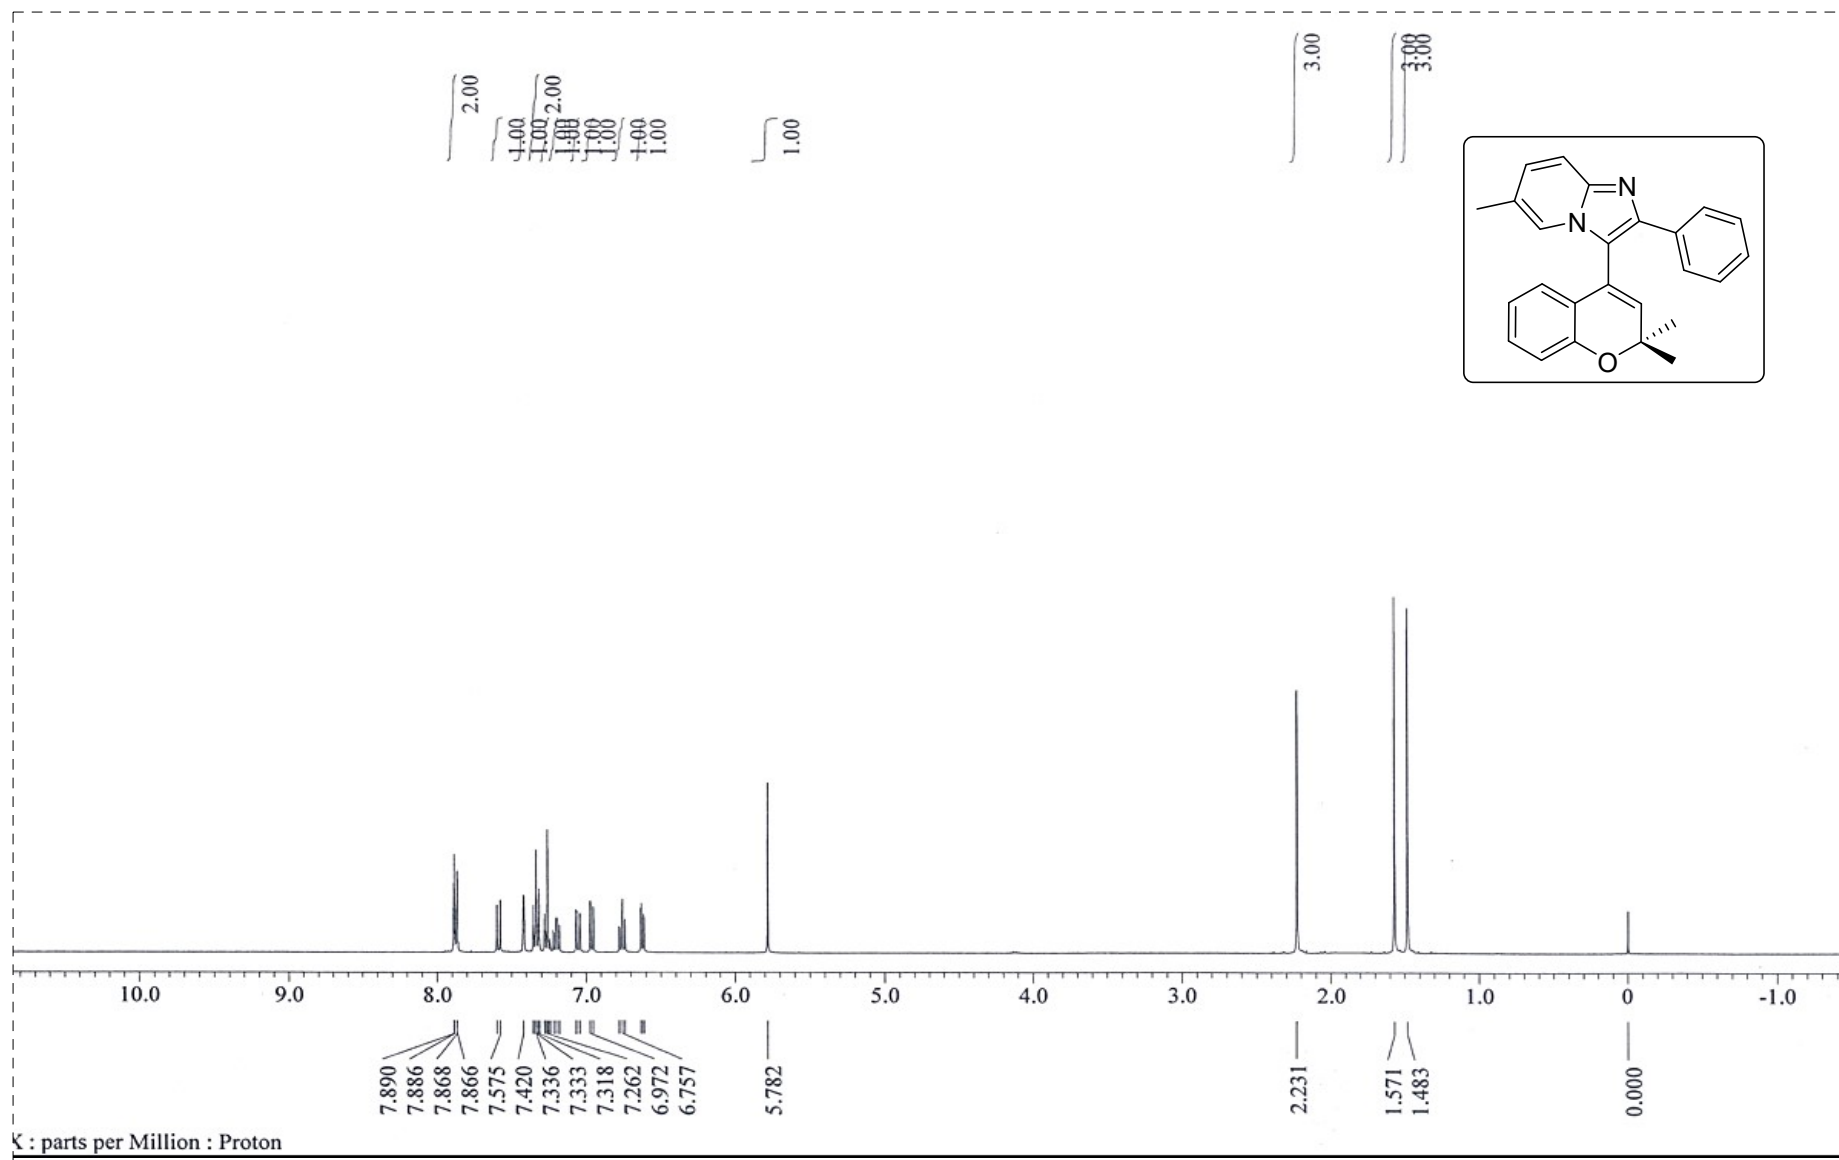

**Fig S7:** <sup>1</sup>H NMR of 3-(2,2-dimethyl-2H-chromen-4-yl)-6-methyl-2-phenylimidazo-[1,2-a]pyridine (**16c**)



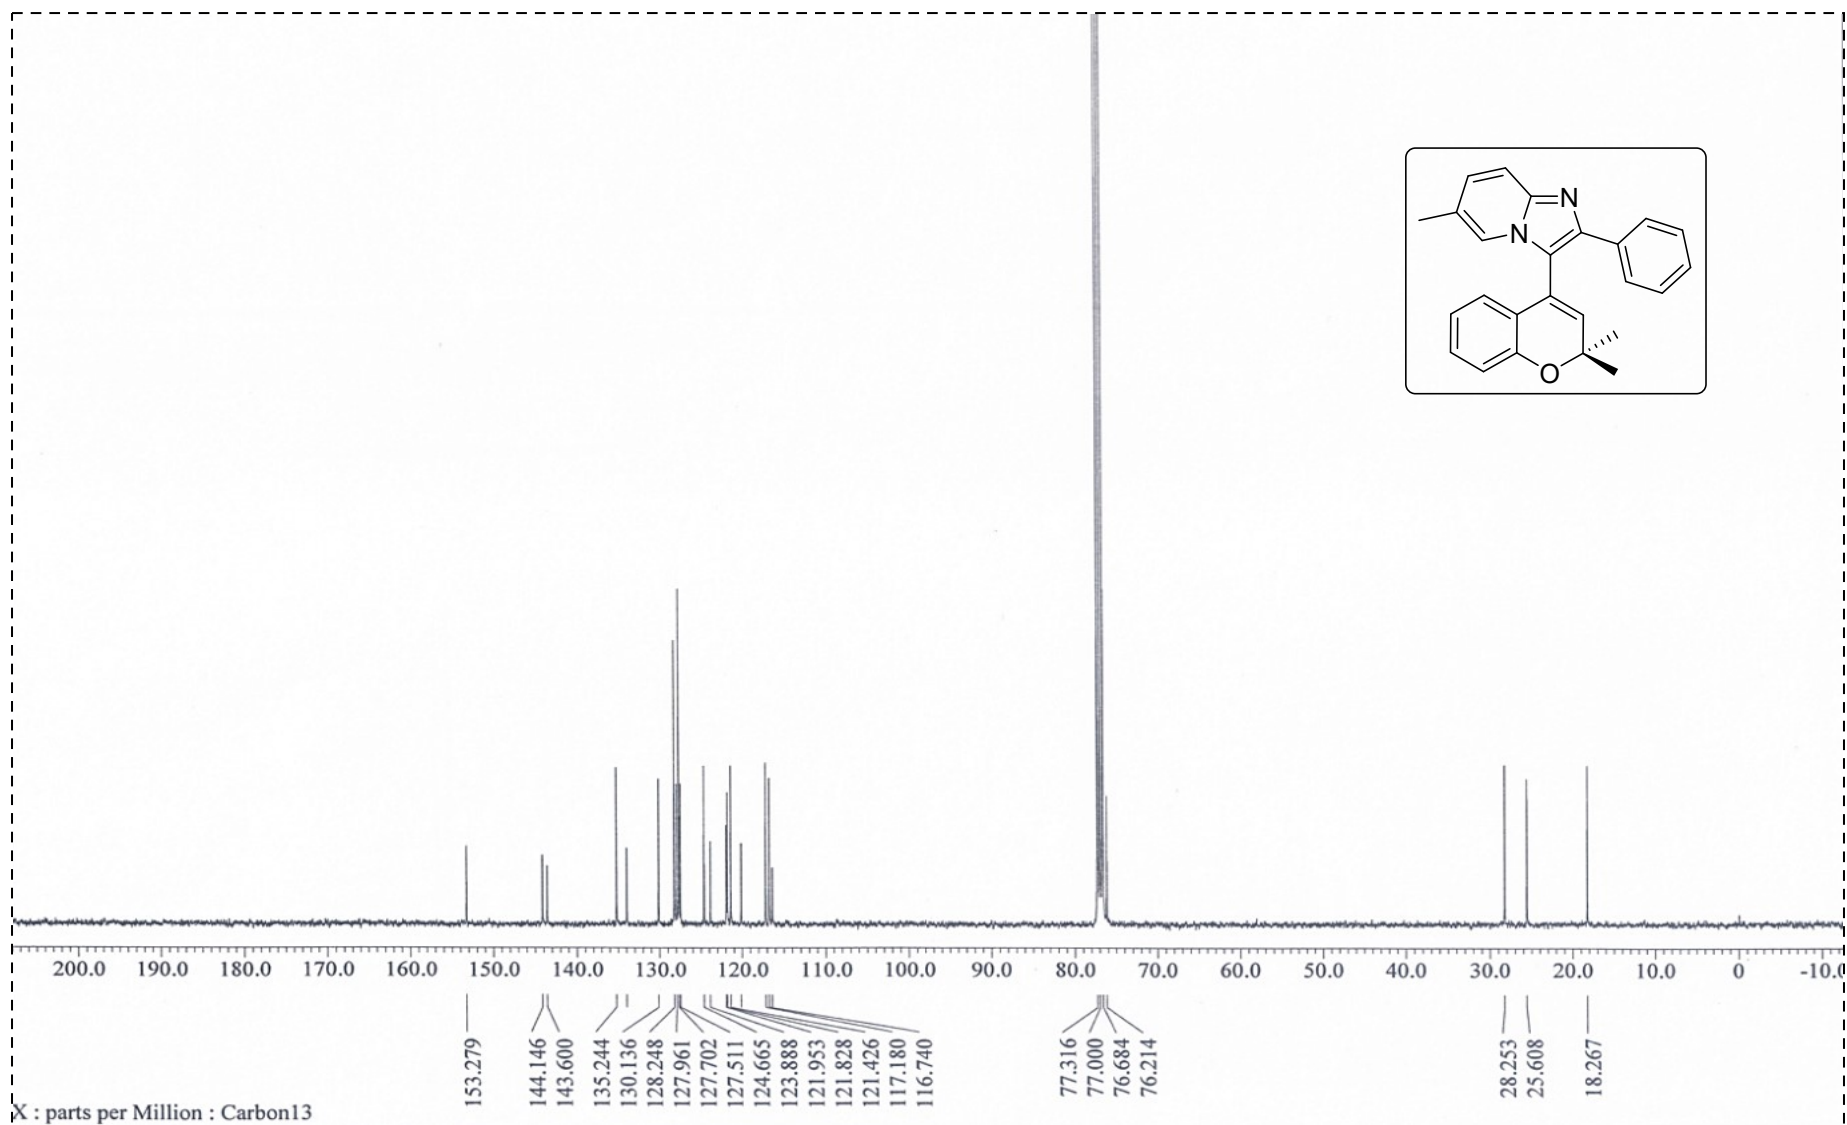

**Fig S8:**  $^{13}\text{C}$  NMR of 3-(2, 2-dimethyl-2H-chromen-4-yl)-6-methyl-2-phenylimidazo-[1,2-a]pyridine (**16c**)

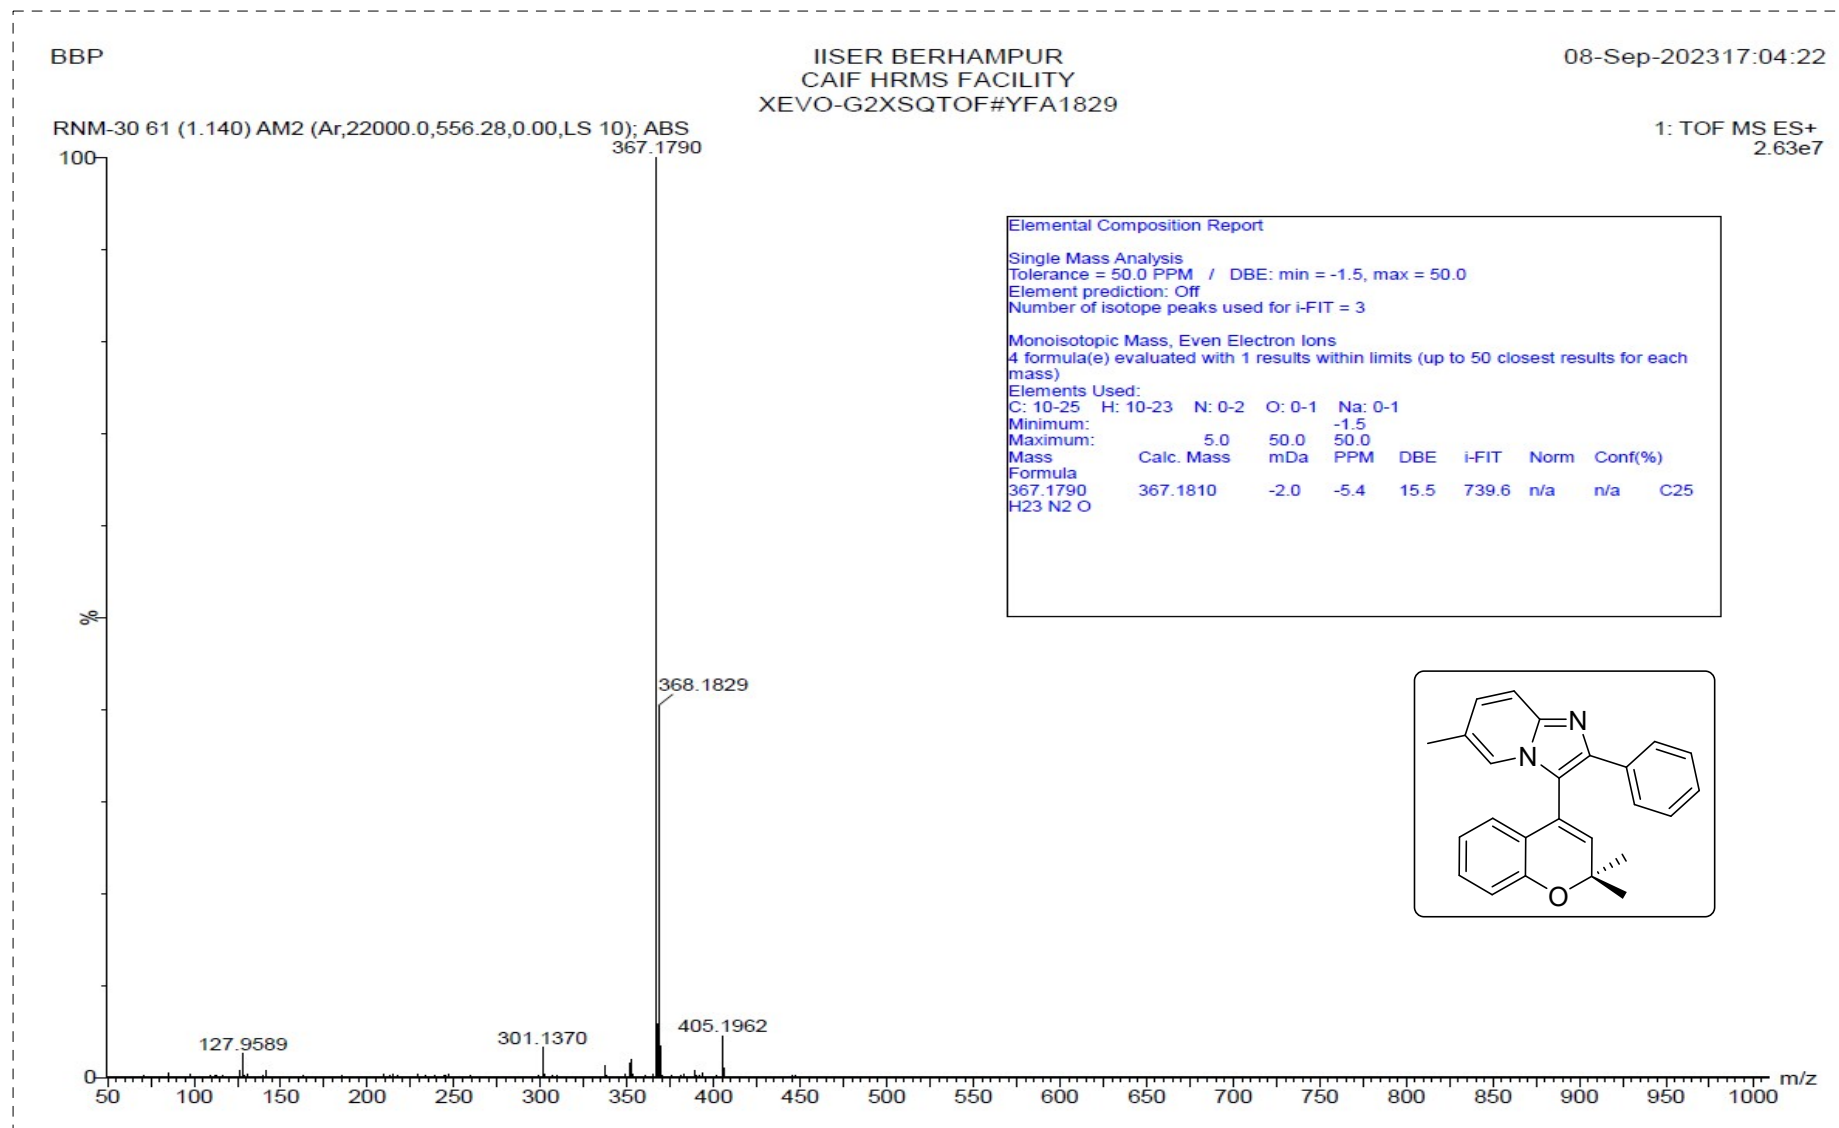

Fig S9: HR-MS of 3-(2,2-dimethyl-2H-chromen-4-yl)-6-methyl-2-phenylimidazo-[1,2-a]pyridine (16c)

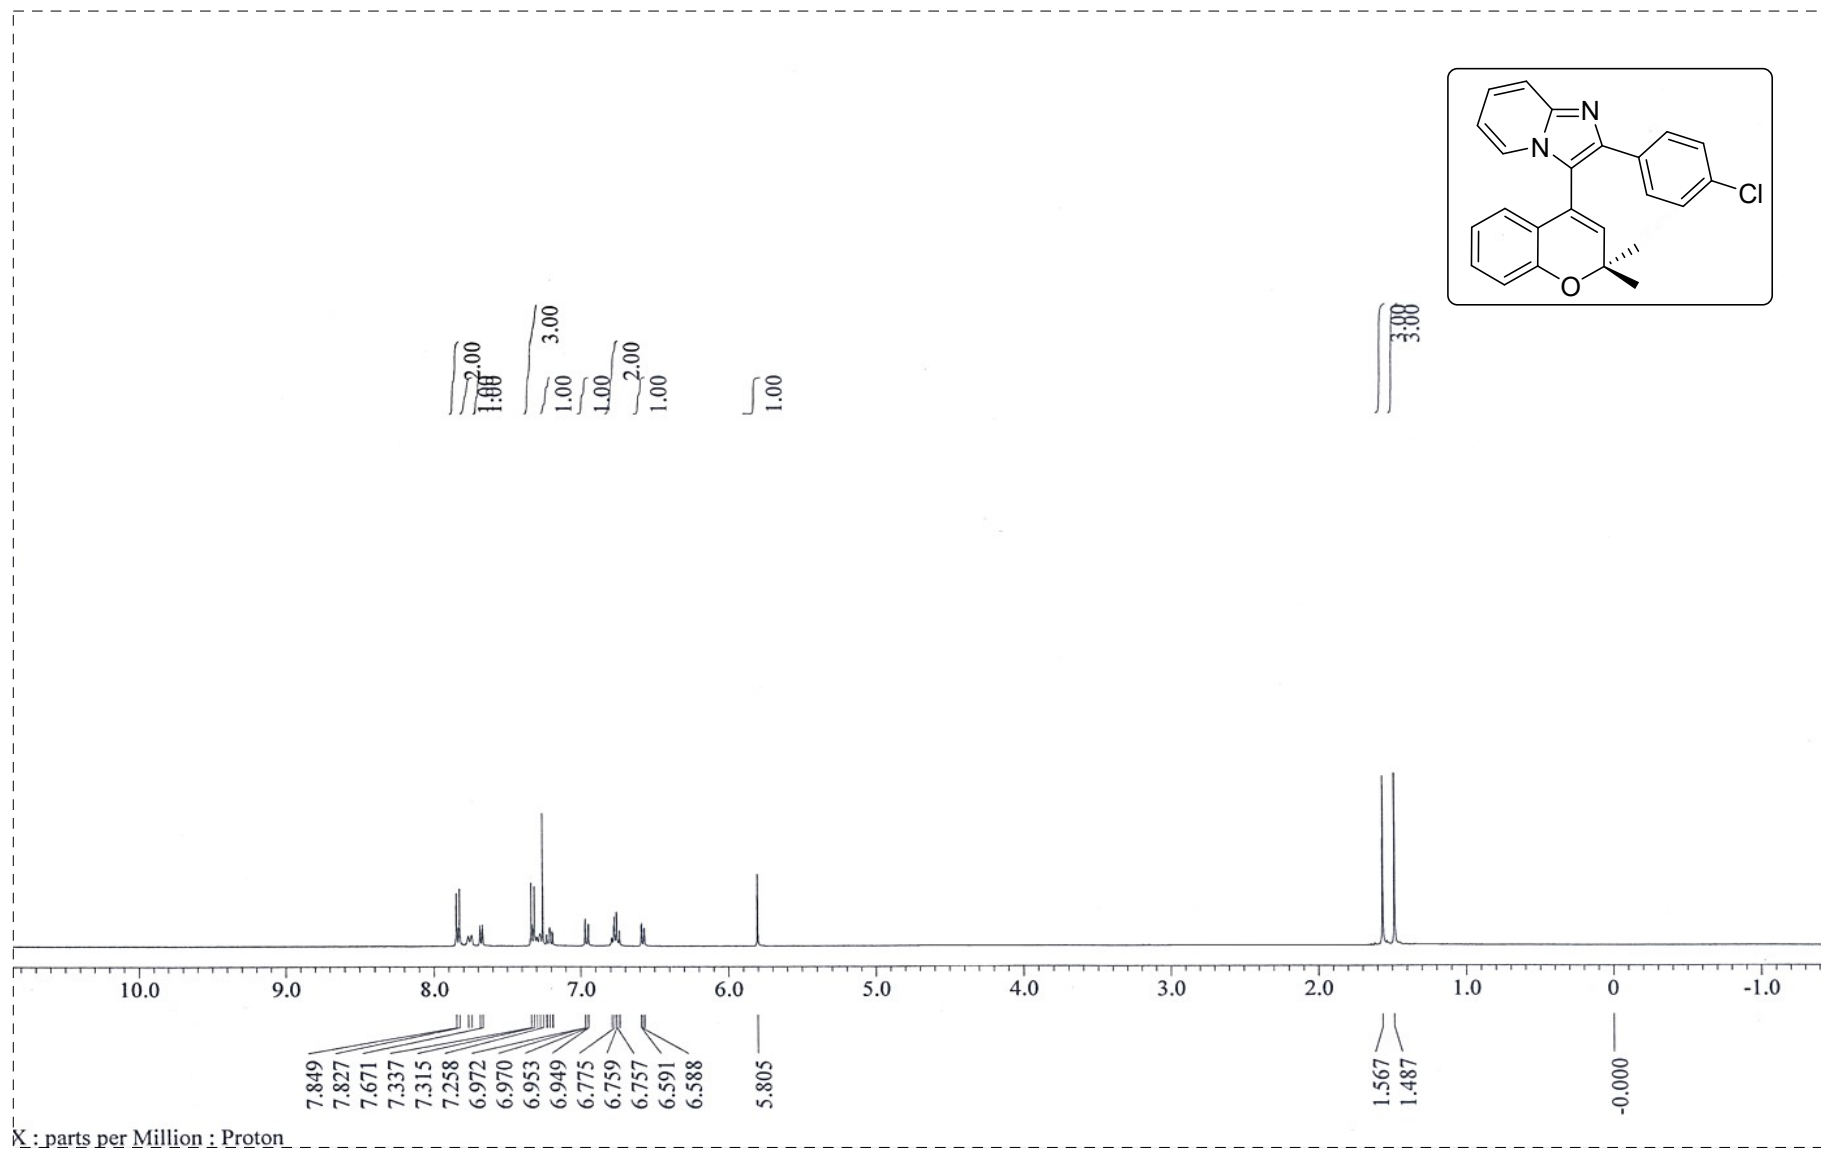

**Fig S10:** <sup>1</sup>H NMR of 2-(4-Chlorophenyl)-3-(2,2-dimethyl-2H-Chromen-4-yl)-imidazo[1,2-a]pyridine (**16d**)

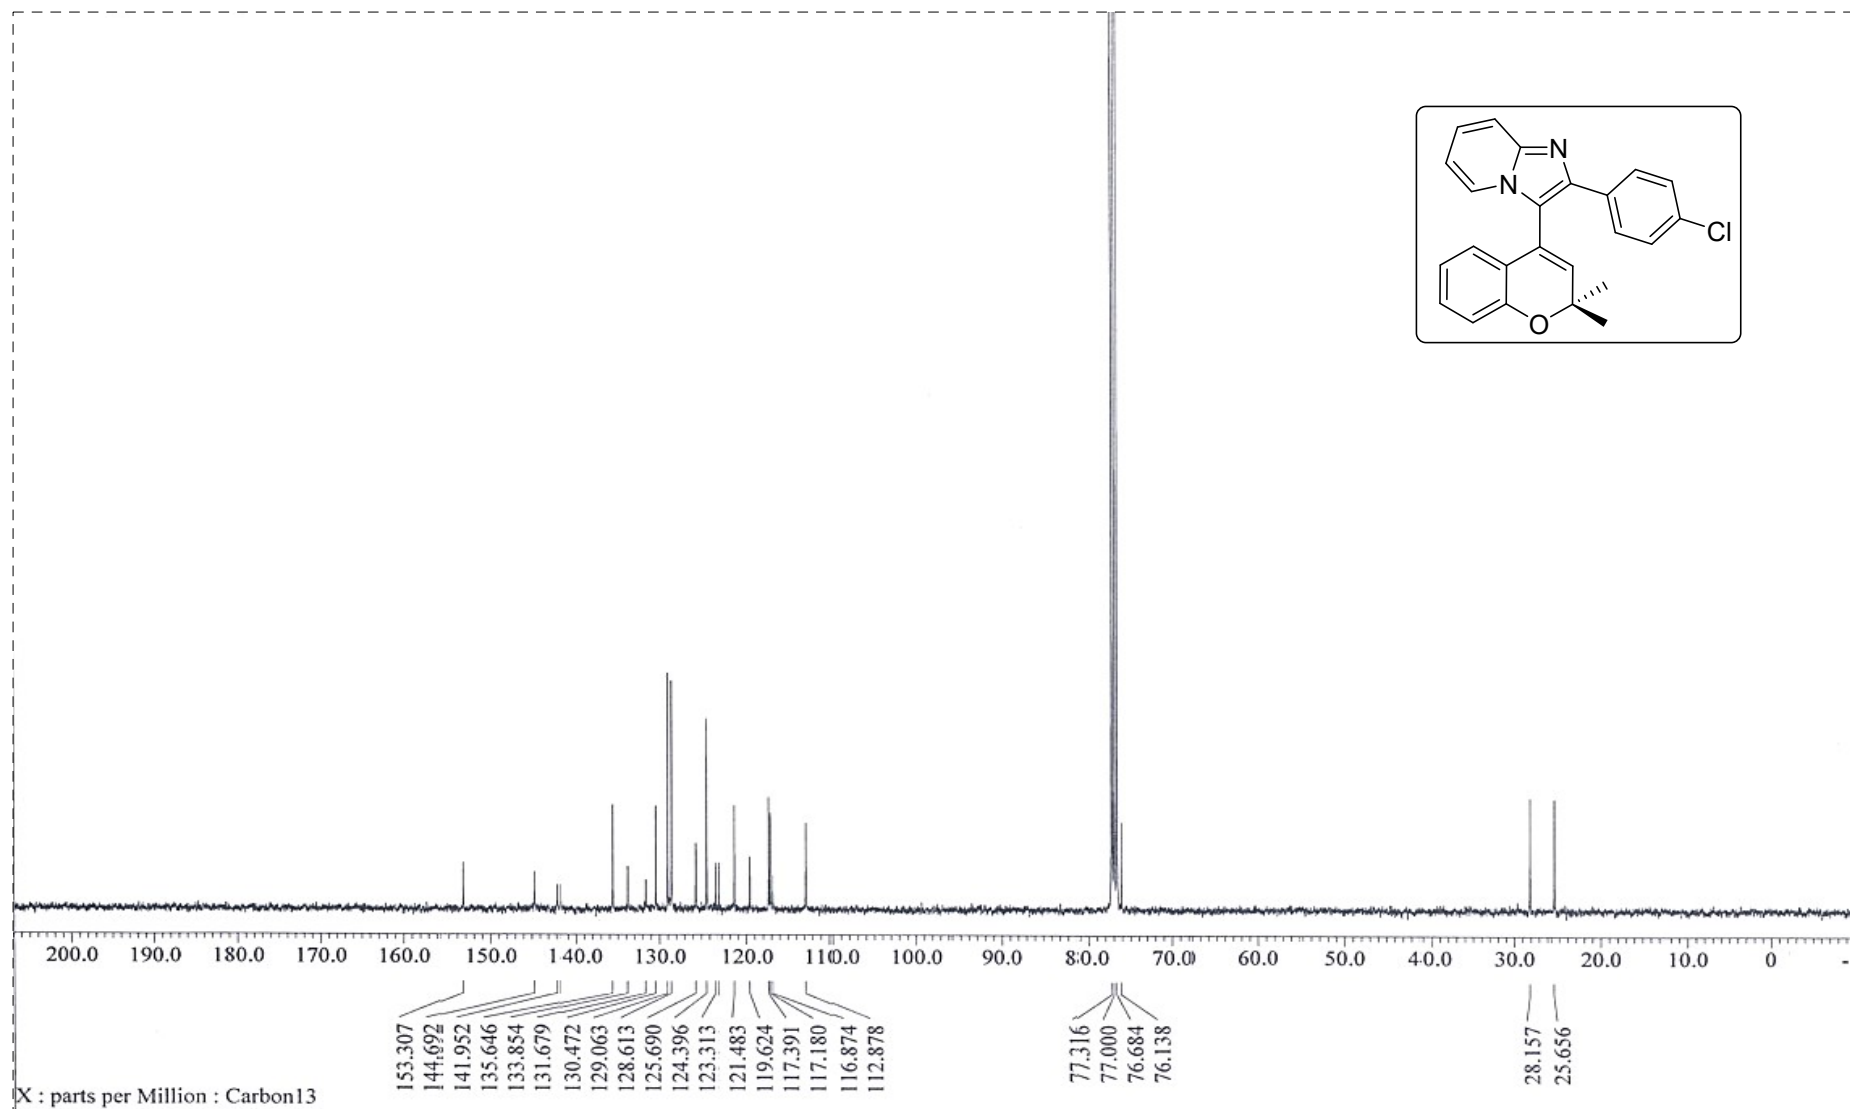

**Fig S11:** <sup>13</sup>C NMR of 2-(4-Chlorophenyl)-3-(2,2-dimethyl-2H-Chromen-4-yl)-imidazo[1,2-a]pyridine (**16d**)

BM

IISER BERHAMPUR  
CAIF HRMS FACILITY  
XEVO-G2XSQTOF#YFA1829

25-Jan-2024 18:37:58

RNM-9 16 (0.310) AM2 (Ar,22000.0,556.28,0.00,LS 10)

1: TOF MS ES+  
2.70e7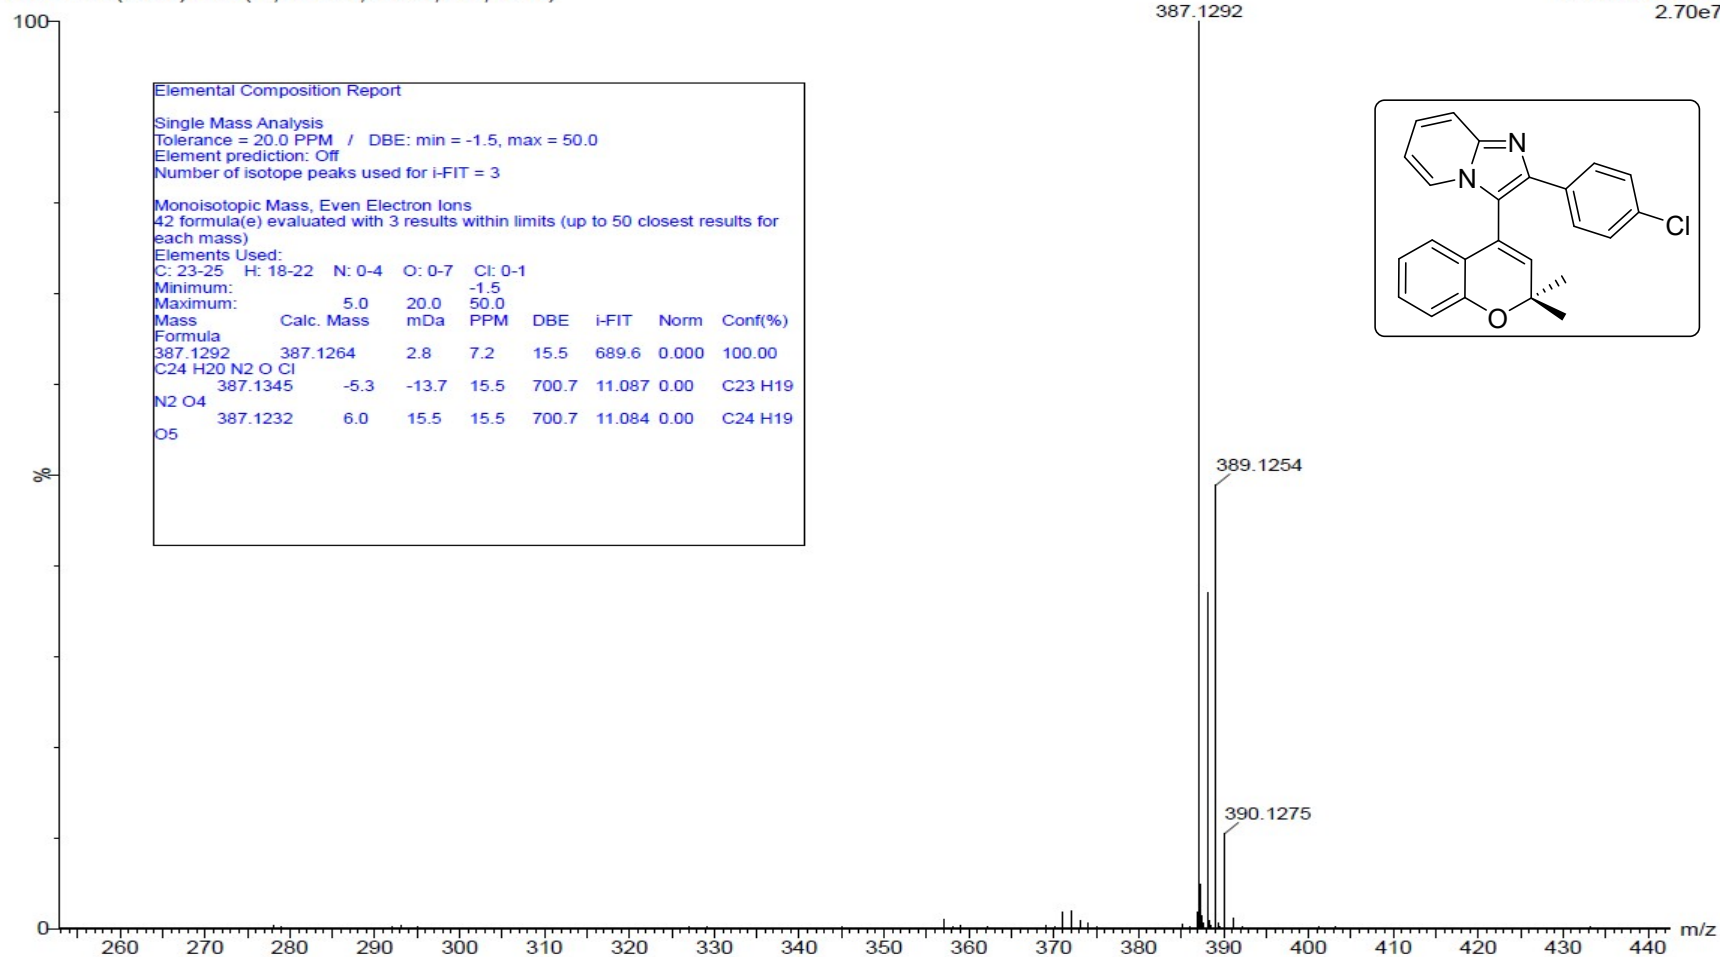

Fig S12: HR-MS of 2-(4-Chlorophenyl)-3-(2,2-dimethyl-2H-Chromen-4-yl)-imidazo[1,2-a]pyridine (16d)

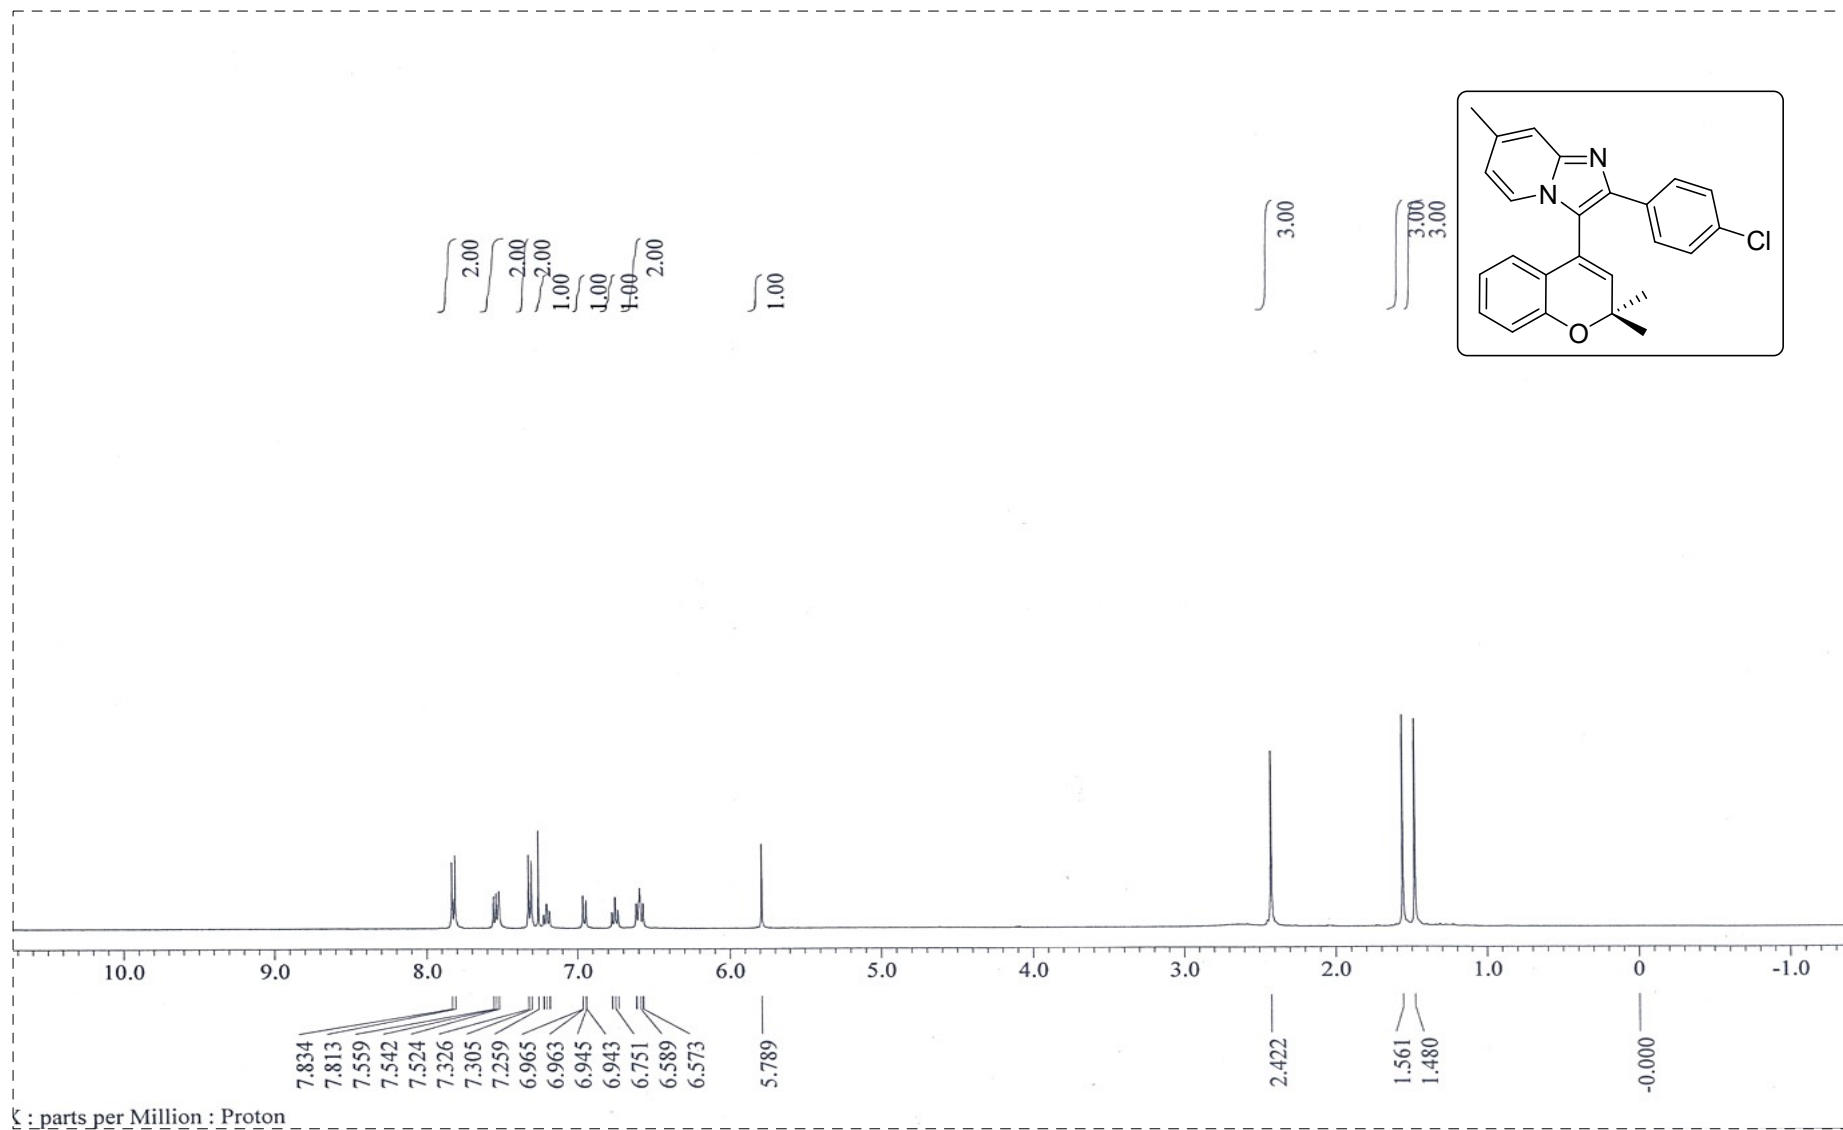

**Fig S13:**  $^1\text{H}$  NMR of 2-(4-chlorophenyl)-3-(2,2-dimethyl-2H-chromen-4-yl)-7-methylimidazo-[1,2-a]pyridine (**16e**)

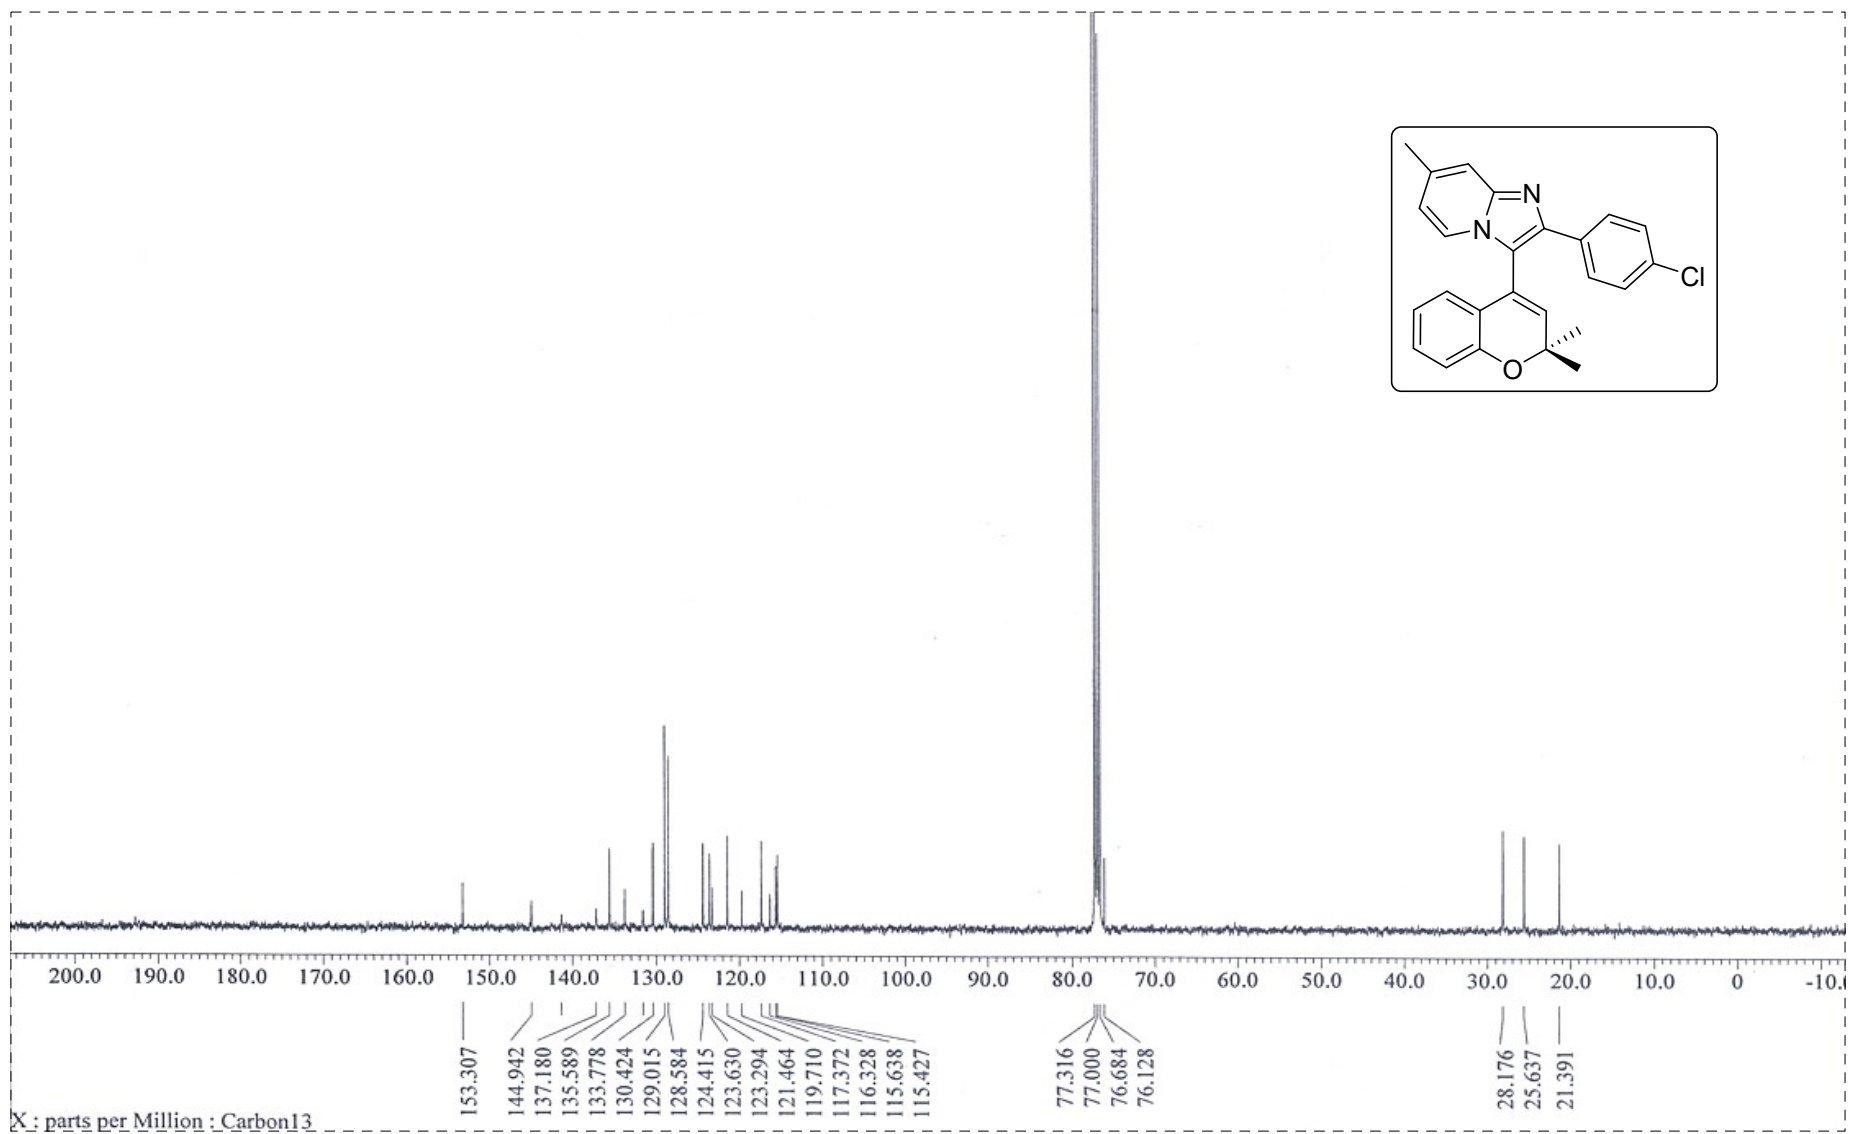

**Fig S14:**  $^{13}\text{C}$  NMR of 2-(4-chlorophenyl)-3-(2,2-dimethyl-2H-chromen-4-yl)-7-methylimidazo-[1,2-a]pyridine (**16e**)

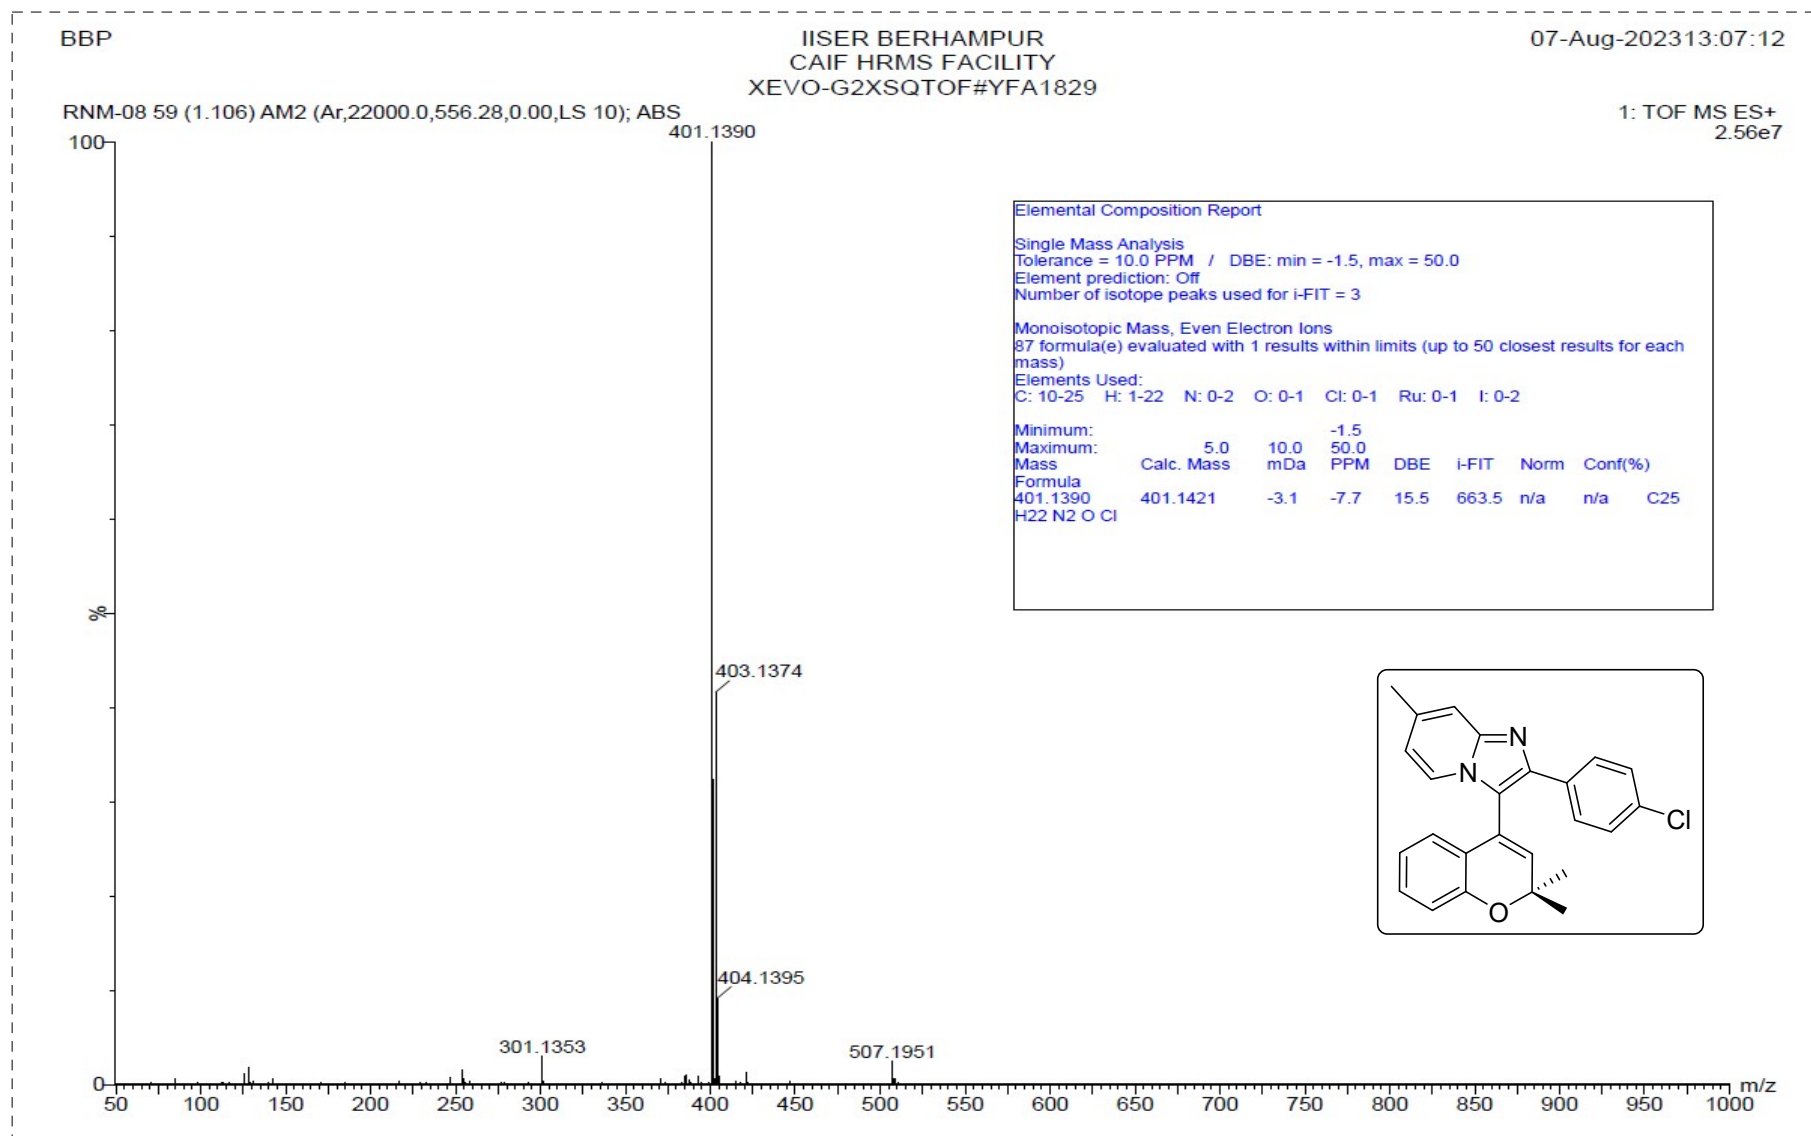

**Fig S15:** HR-MS of 2-(4-chlorophenyl)-3-(2,2-dimethyl-2H-chromen-4-yl)-7-methylimidazo-[1,2-a]pyridine (16e)



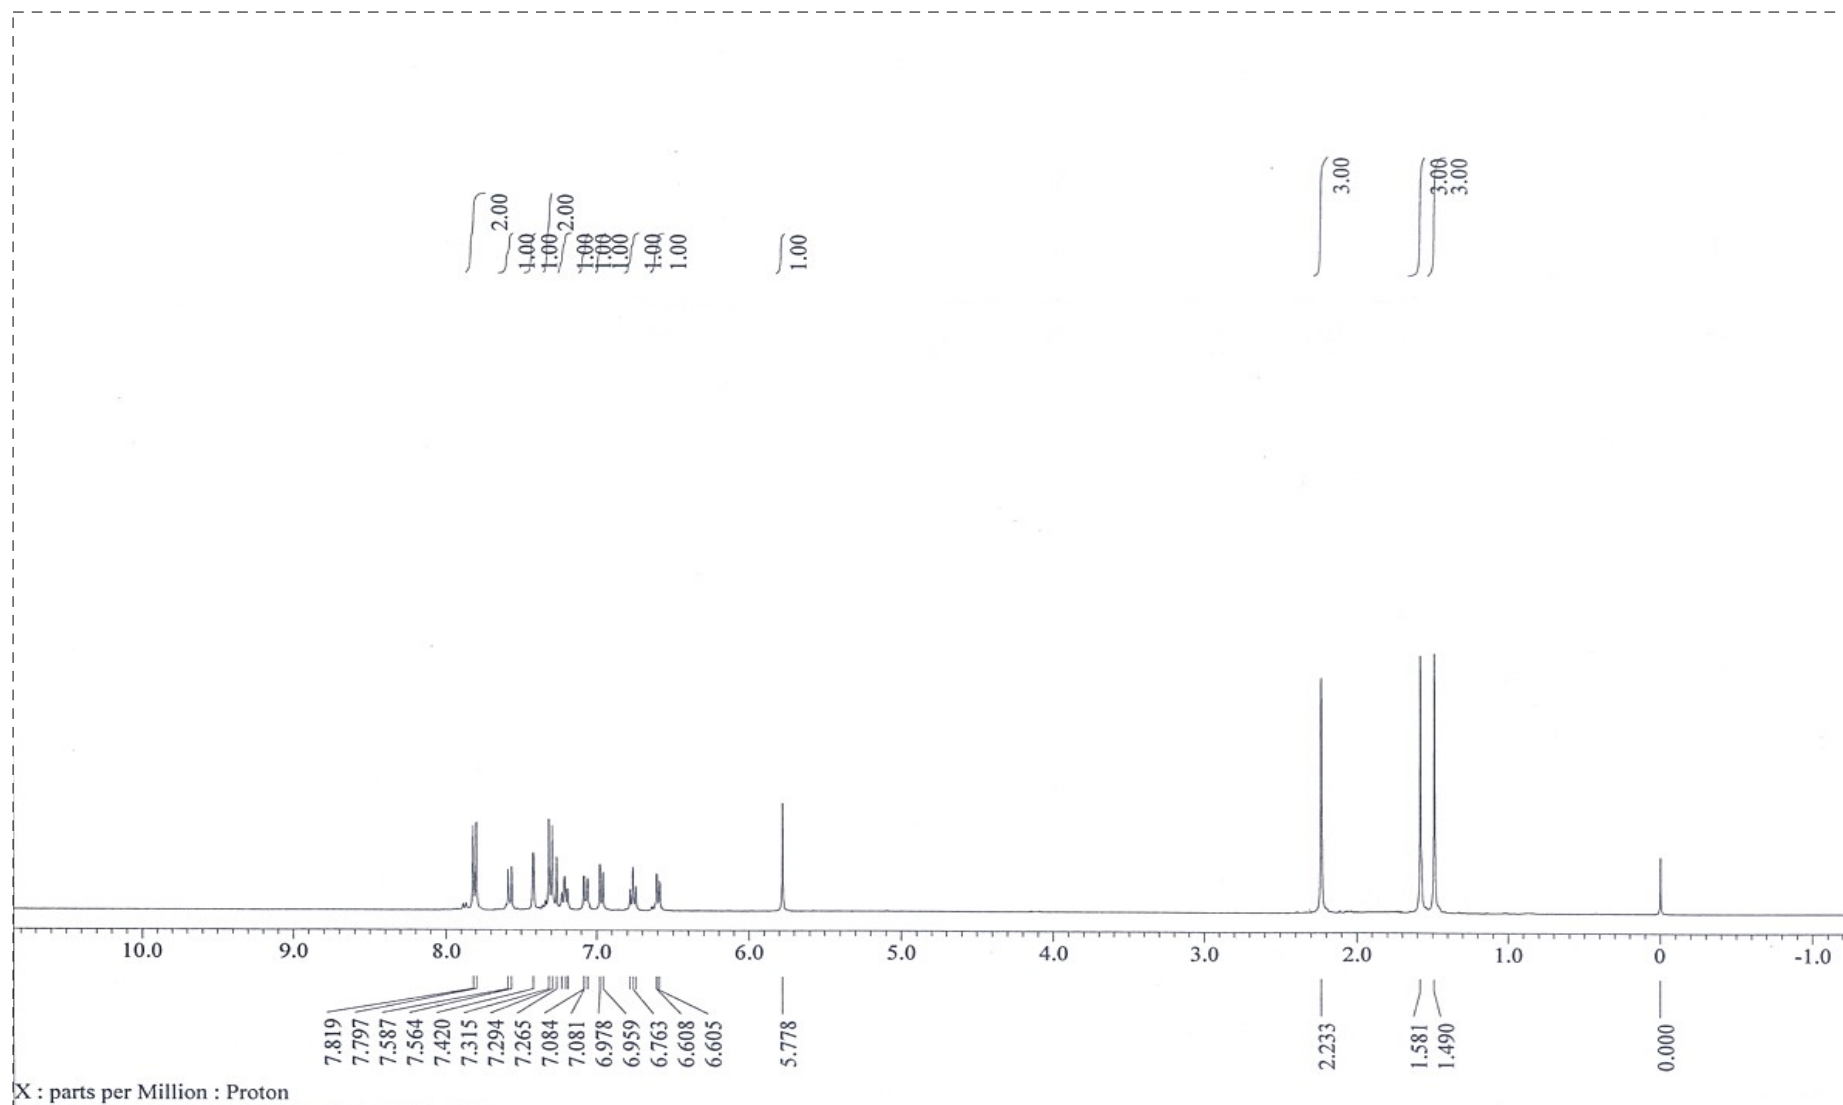

**Fig S16:**  $^1\text{H}$  NMR of 2-(4-chlorophenyl)-3-(2,2-dimethyl-2H-chromen-4-yl)-6-methylimidazo-[1,2-a]pyridine (**16f**)

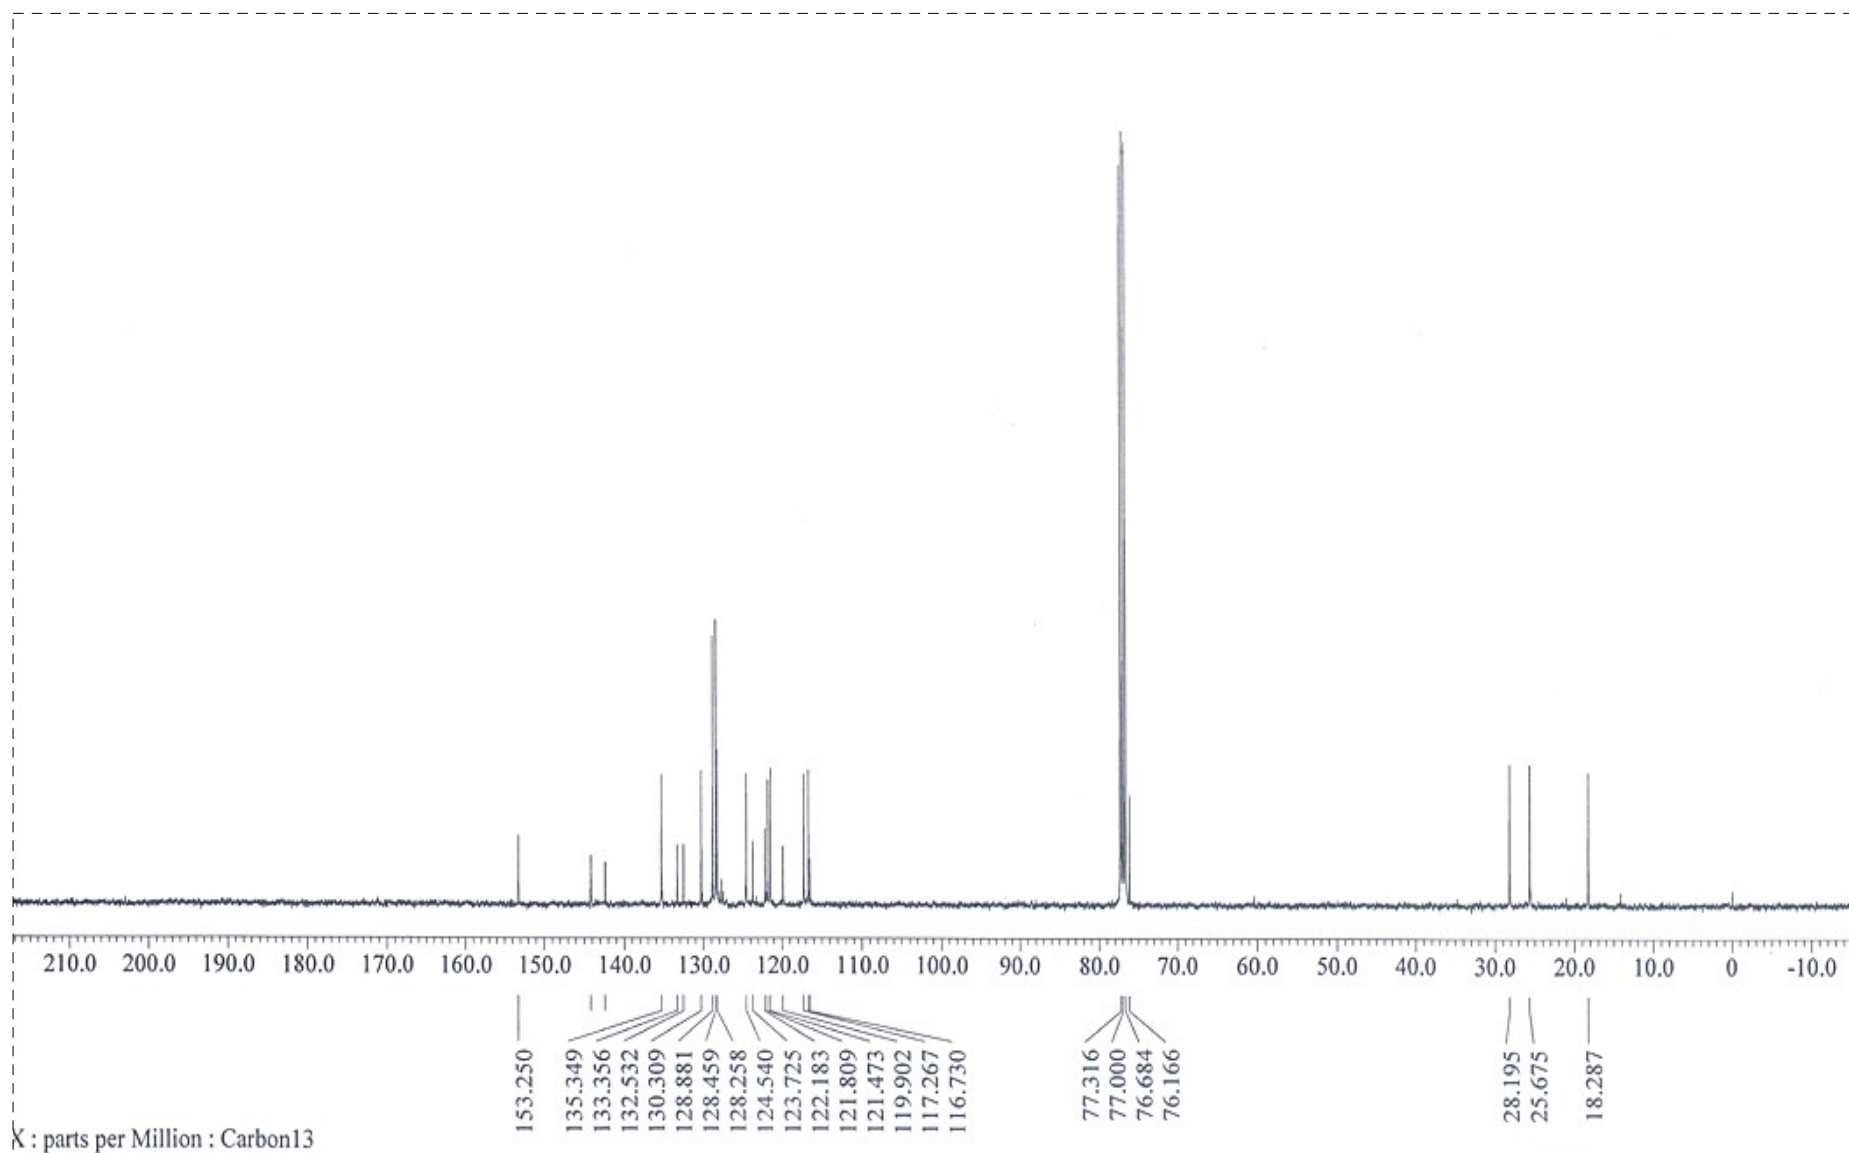

**Fig S17:**  $^{13}\text{C}$  NMR of 2-(4-chlorophenyl)-3-(2,2-dimethyl-2H-chromen-4-yl)-6-methylimidazo-[1,2-a]pyridine (**16f**)

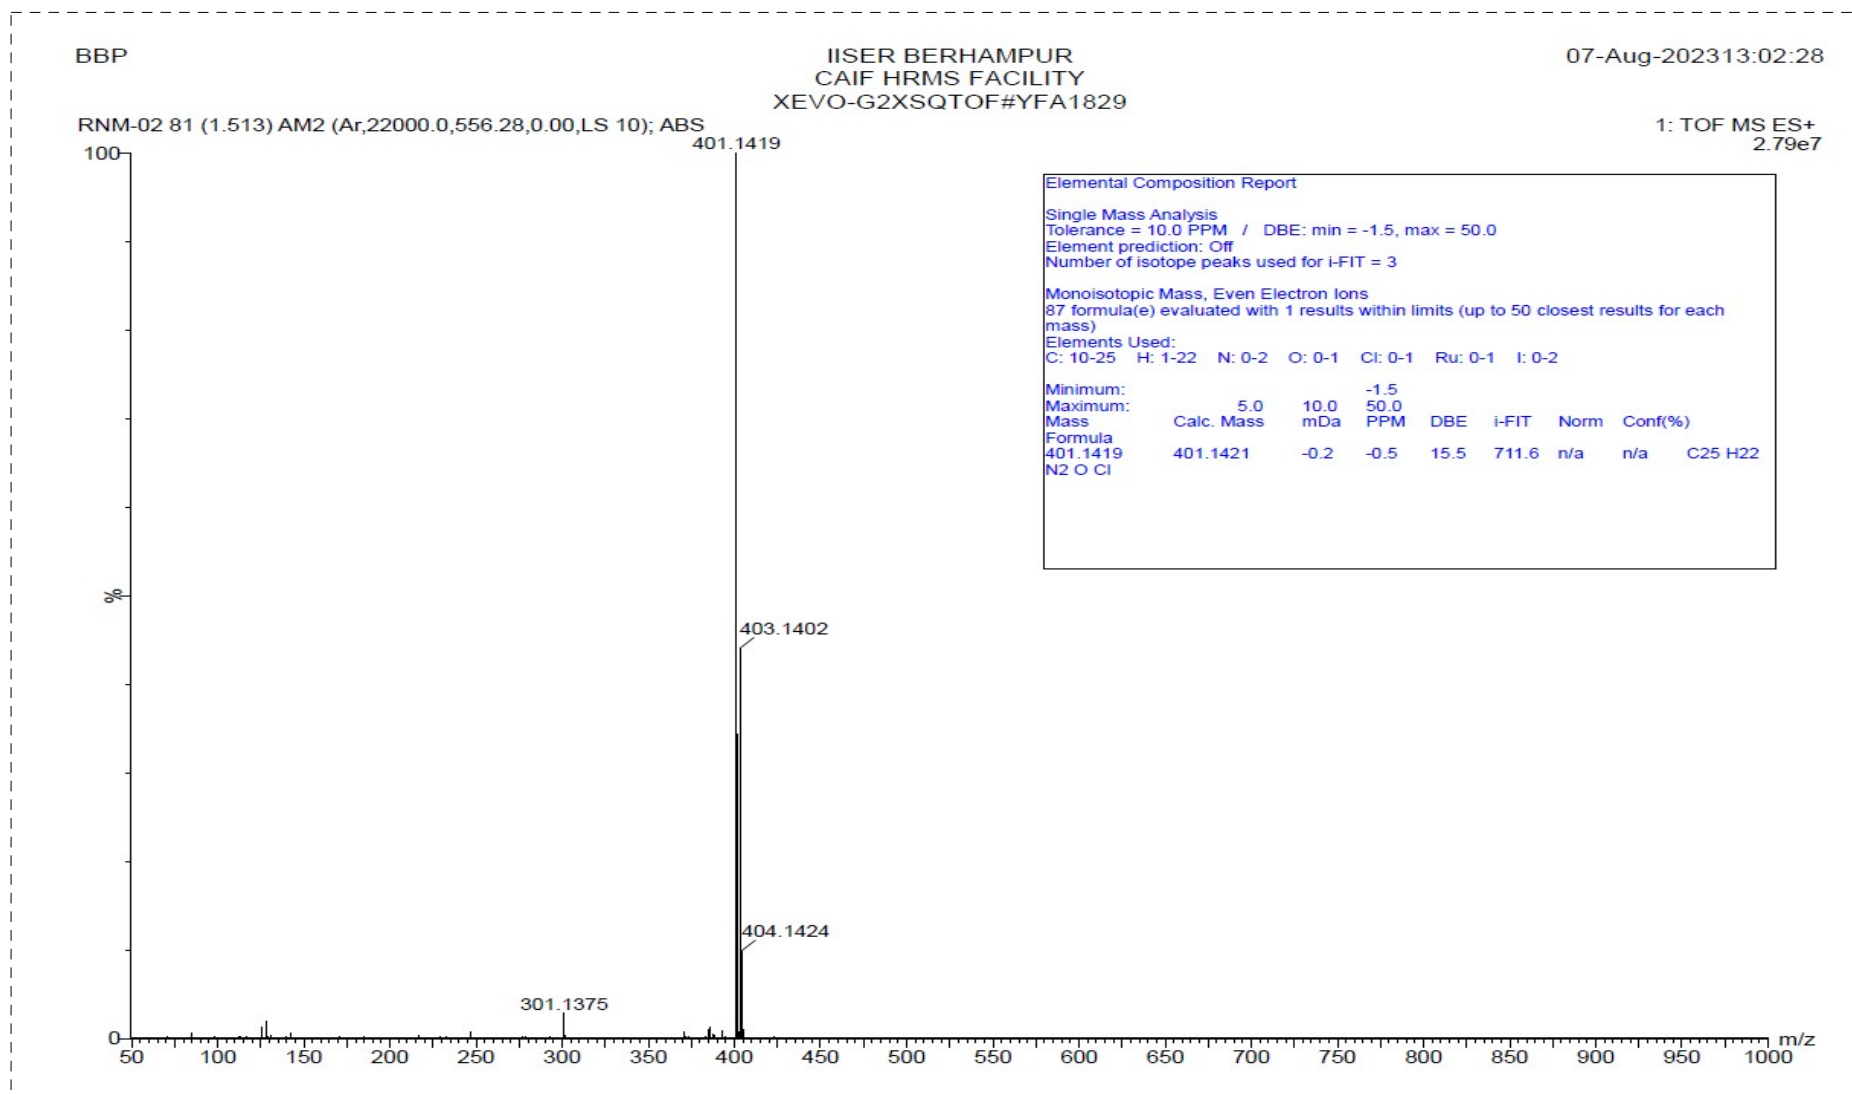

**Fig S18:** HR-MS of 2-(4-chlorophenyl)-3-(2,2-dimethyl-2H-chromen-4-yl)-6-methylimidazo-[1,2-a]pyridine (**16f**)

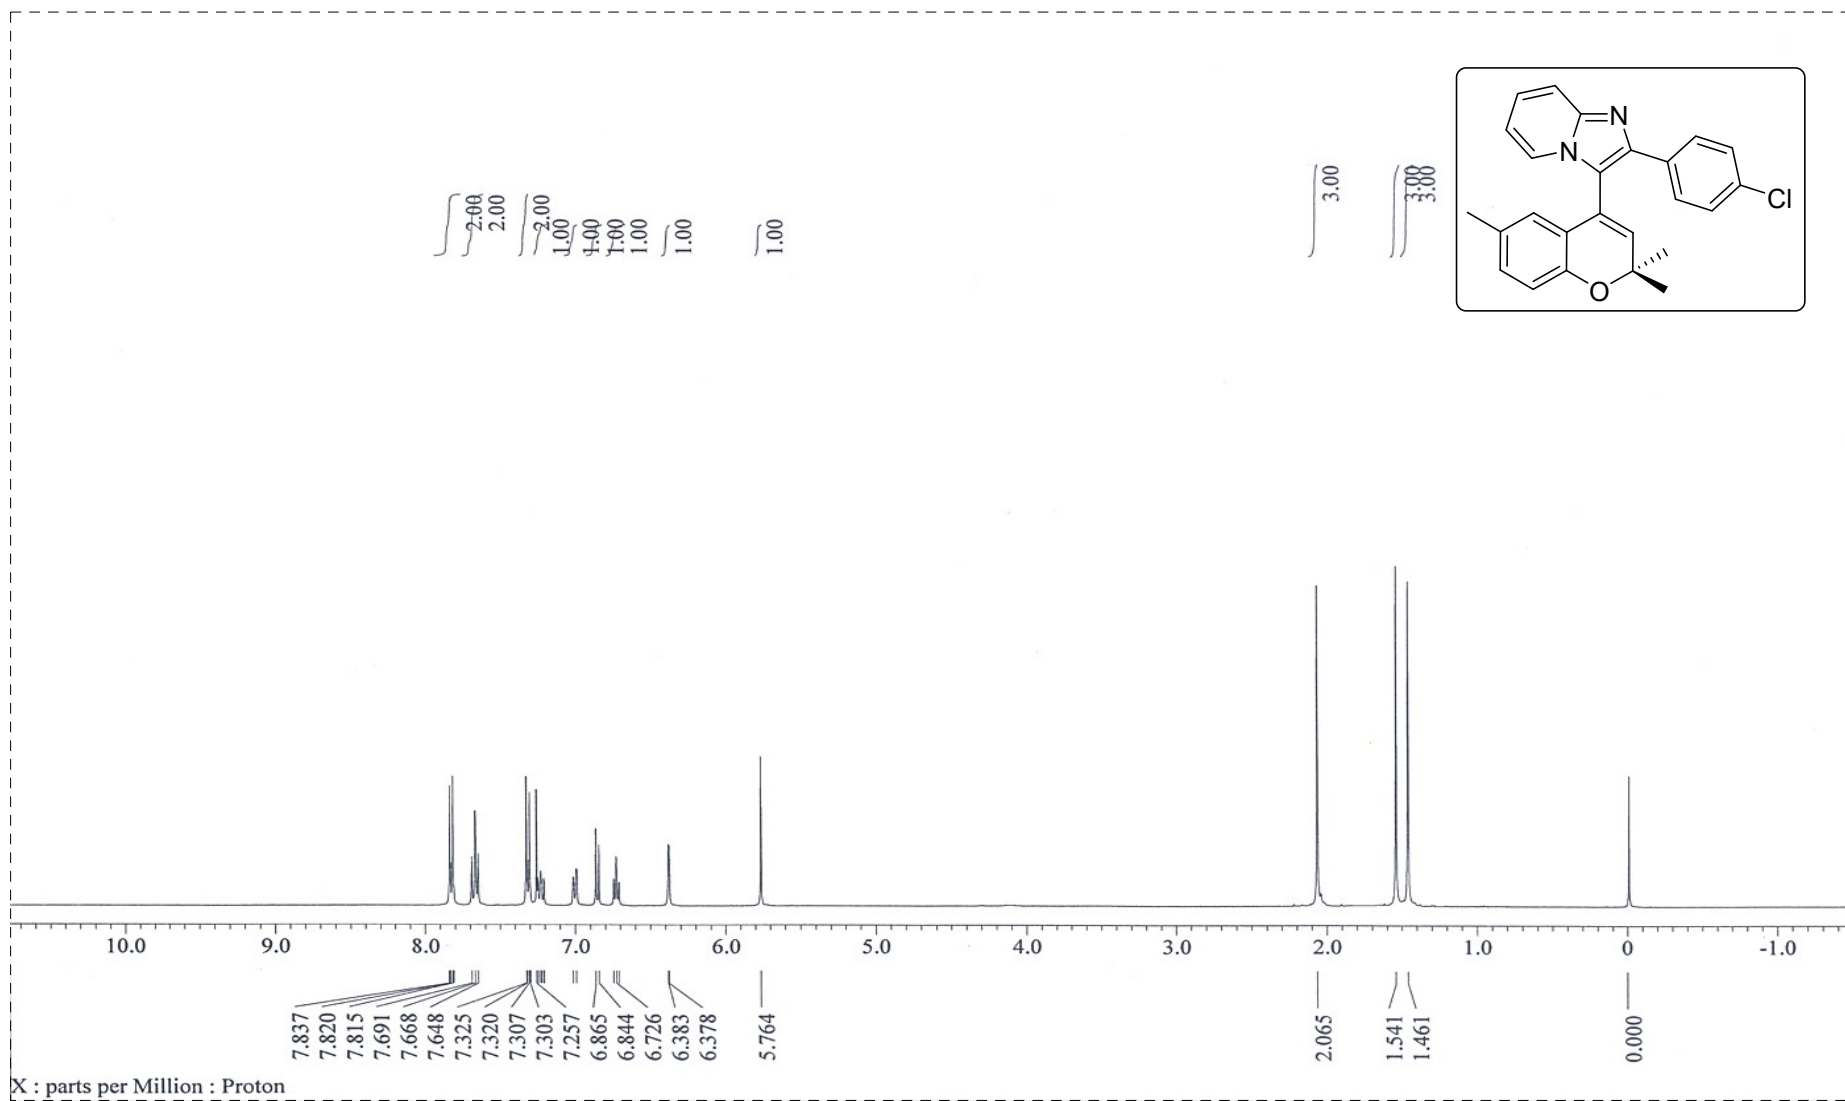

**Fig S19:** <sup>1</sup>H NMR of 2-(4-chlorophenyl)-3-(2,2,6-trimethyl-2H-chromen-4-yl)-imidazo-[1,2-a]pyridine (16g)

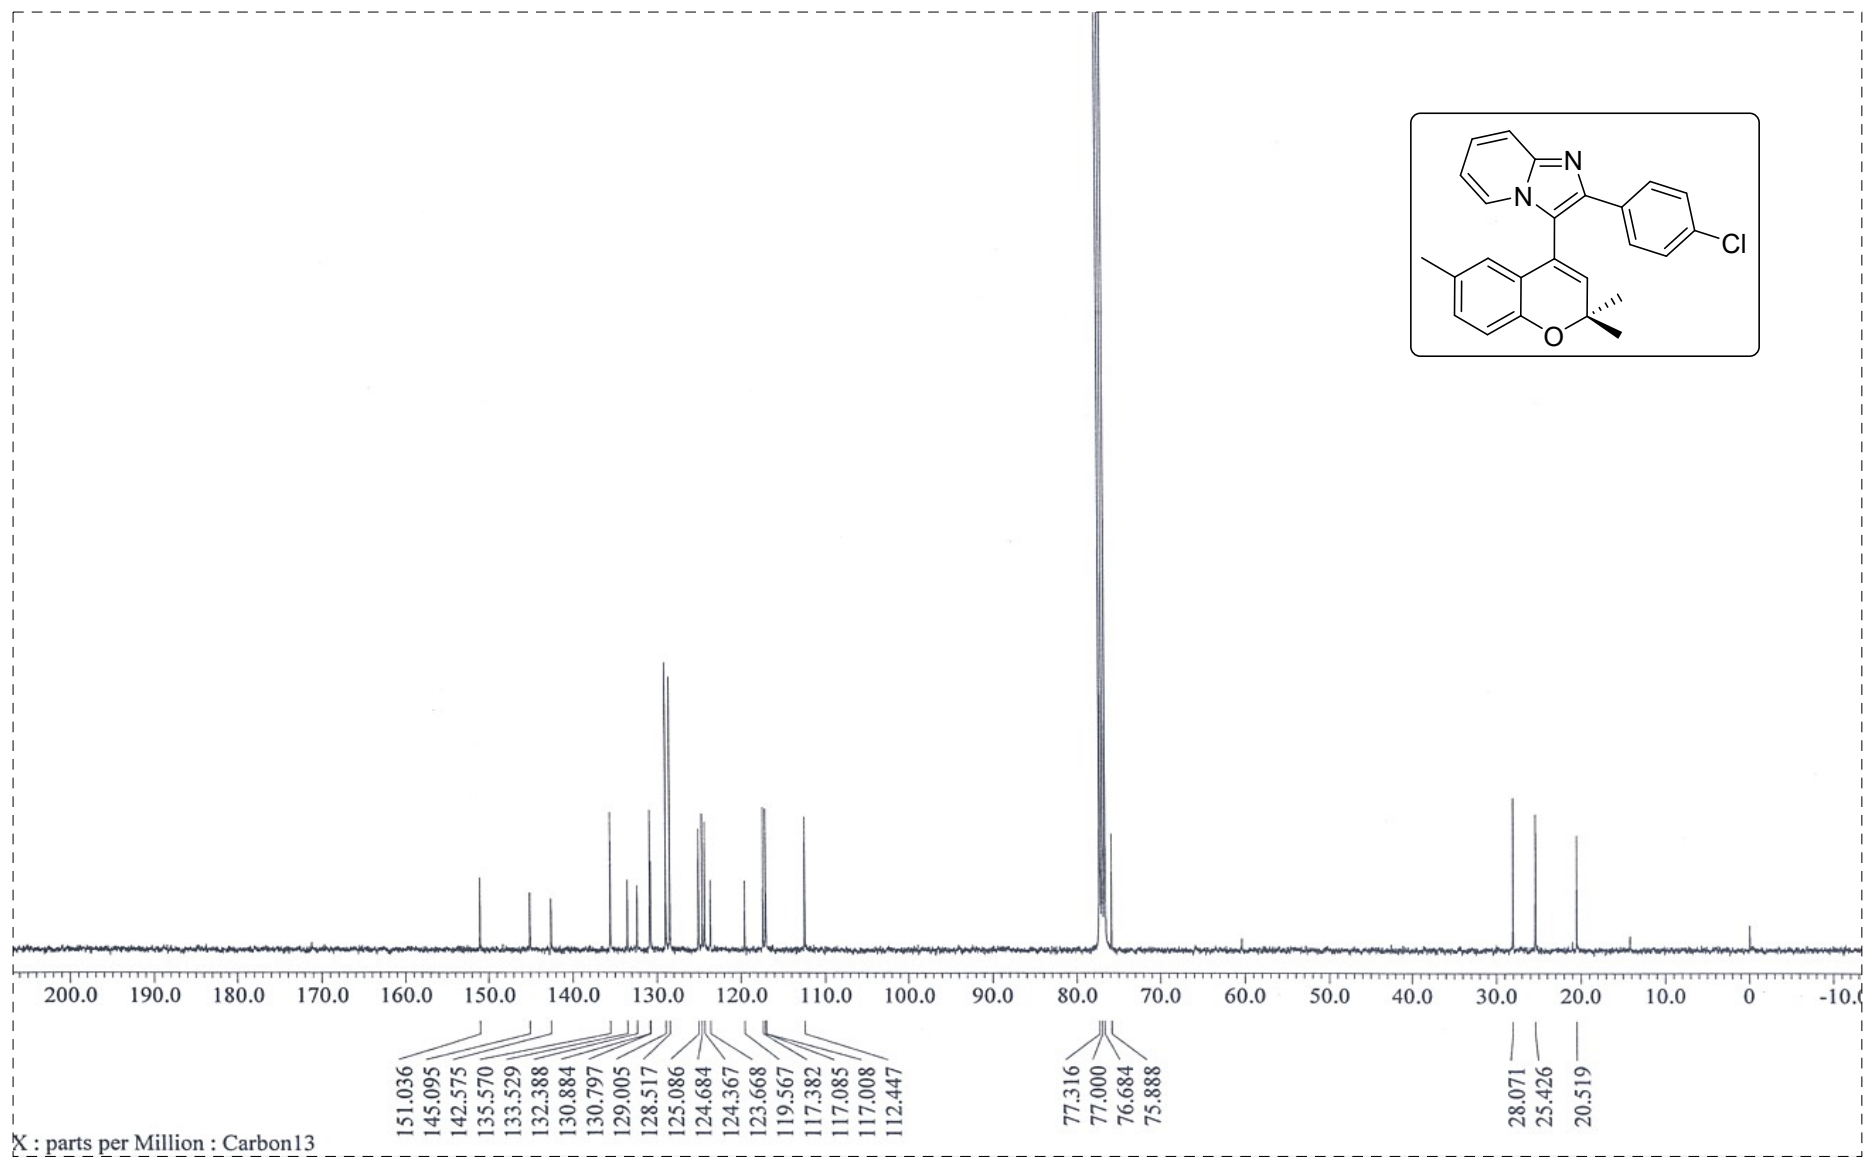

**Fig S20:** <sup>13</sup>C NMR of 2-(4-chlorophenyl)-3-(2,2,6-trimethyl-2H-chromen-4-yl)-imidazo-[1,2-a]pyridine (**16g**)

BBP

IISER BERHAMPUR  
CAIF HRMS FACILITY  
XEVO-G2XSQTOF#YFA1829

07-Aug-2023 13:45:41

RNM-20 114 (2.117) AM2 (Ar,22000.0,556.28,0.00,LS 10); ABS

1: TOF MS ES+  
4.07e7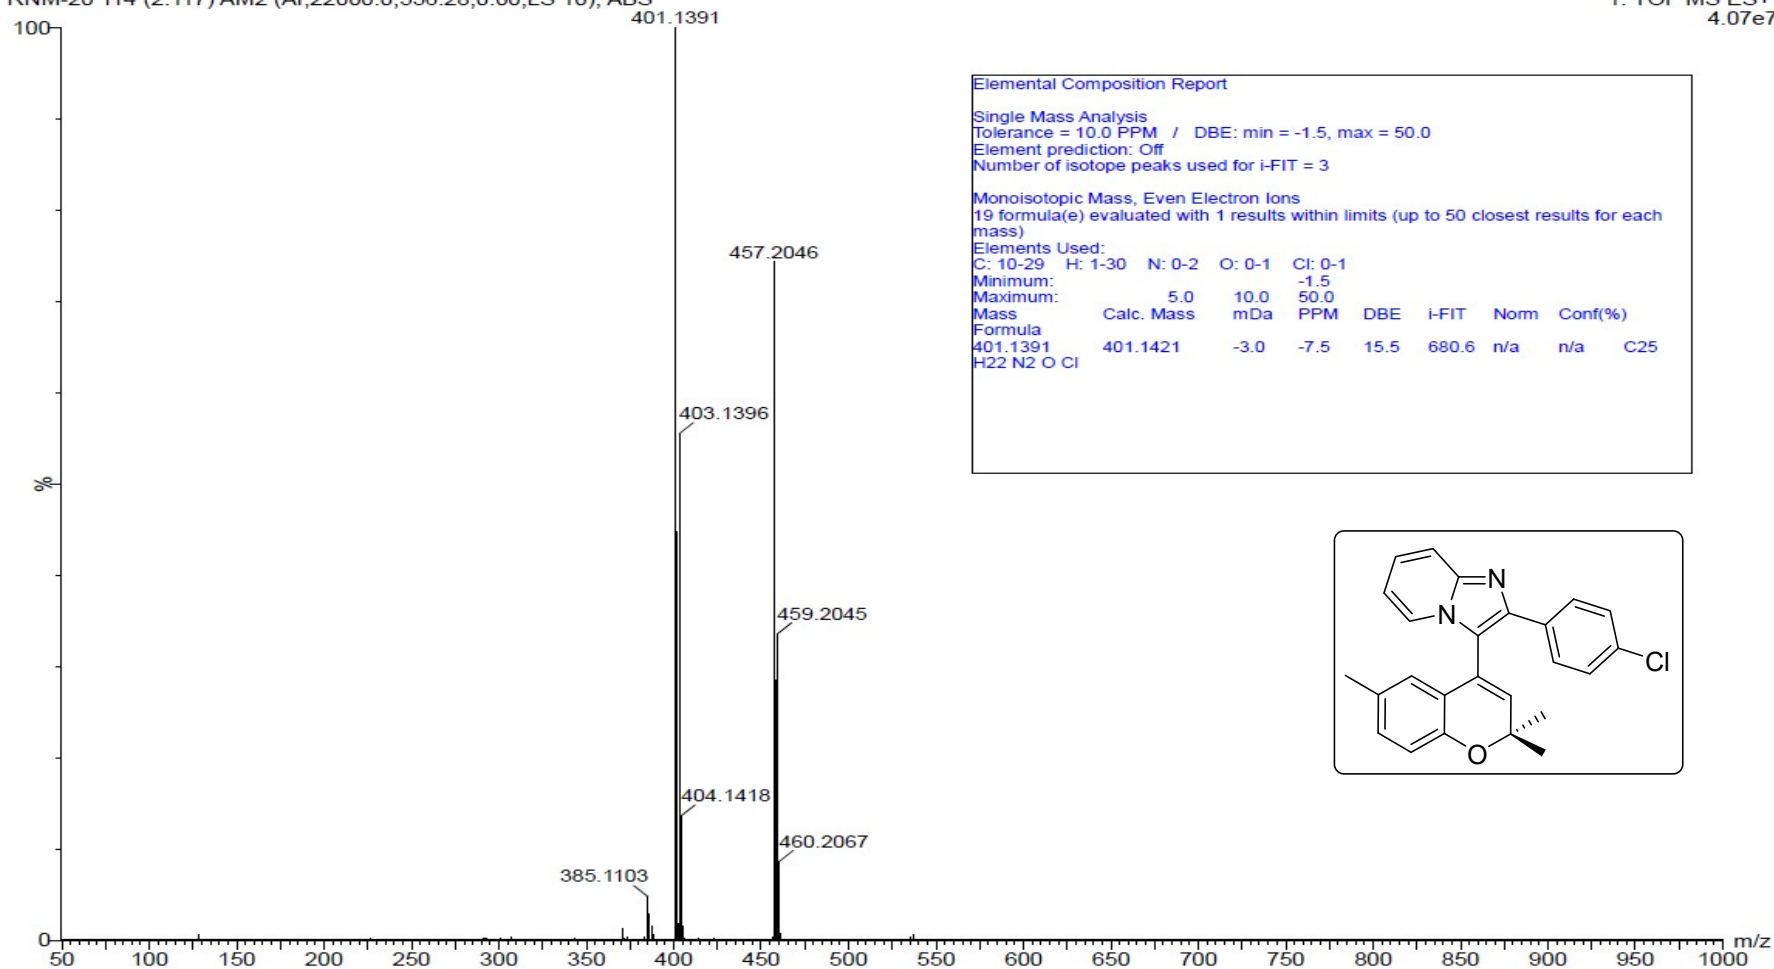

Fig S21: HR-MS of 2-(4-chlorophenyl)-3-(2,2,6-trimethyl-2H-chromen-4-yl)-imidazo-[1,2-a]pyridine (**16g**)

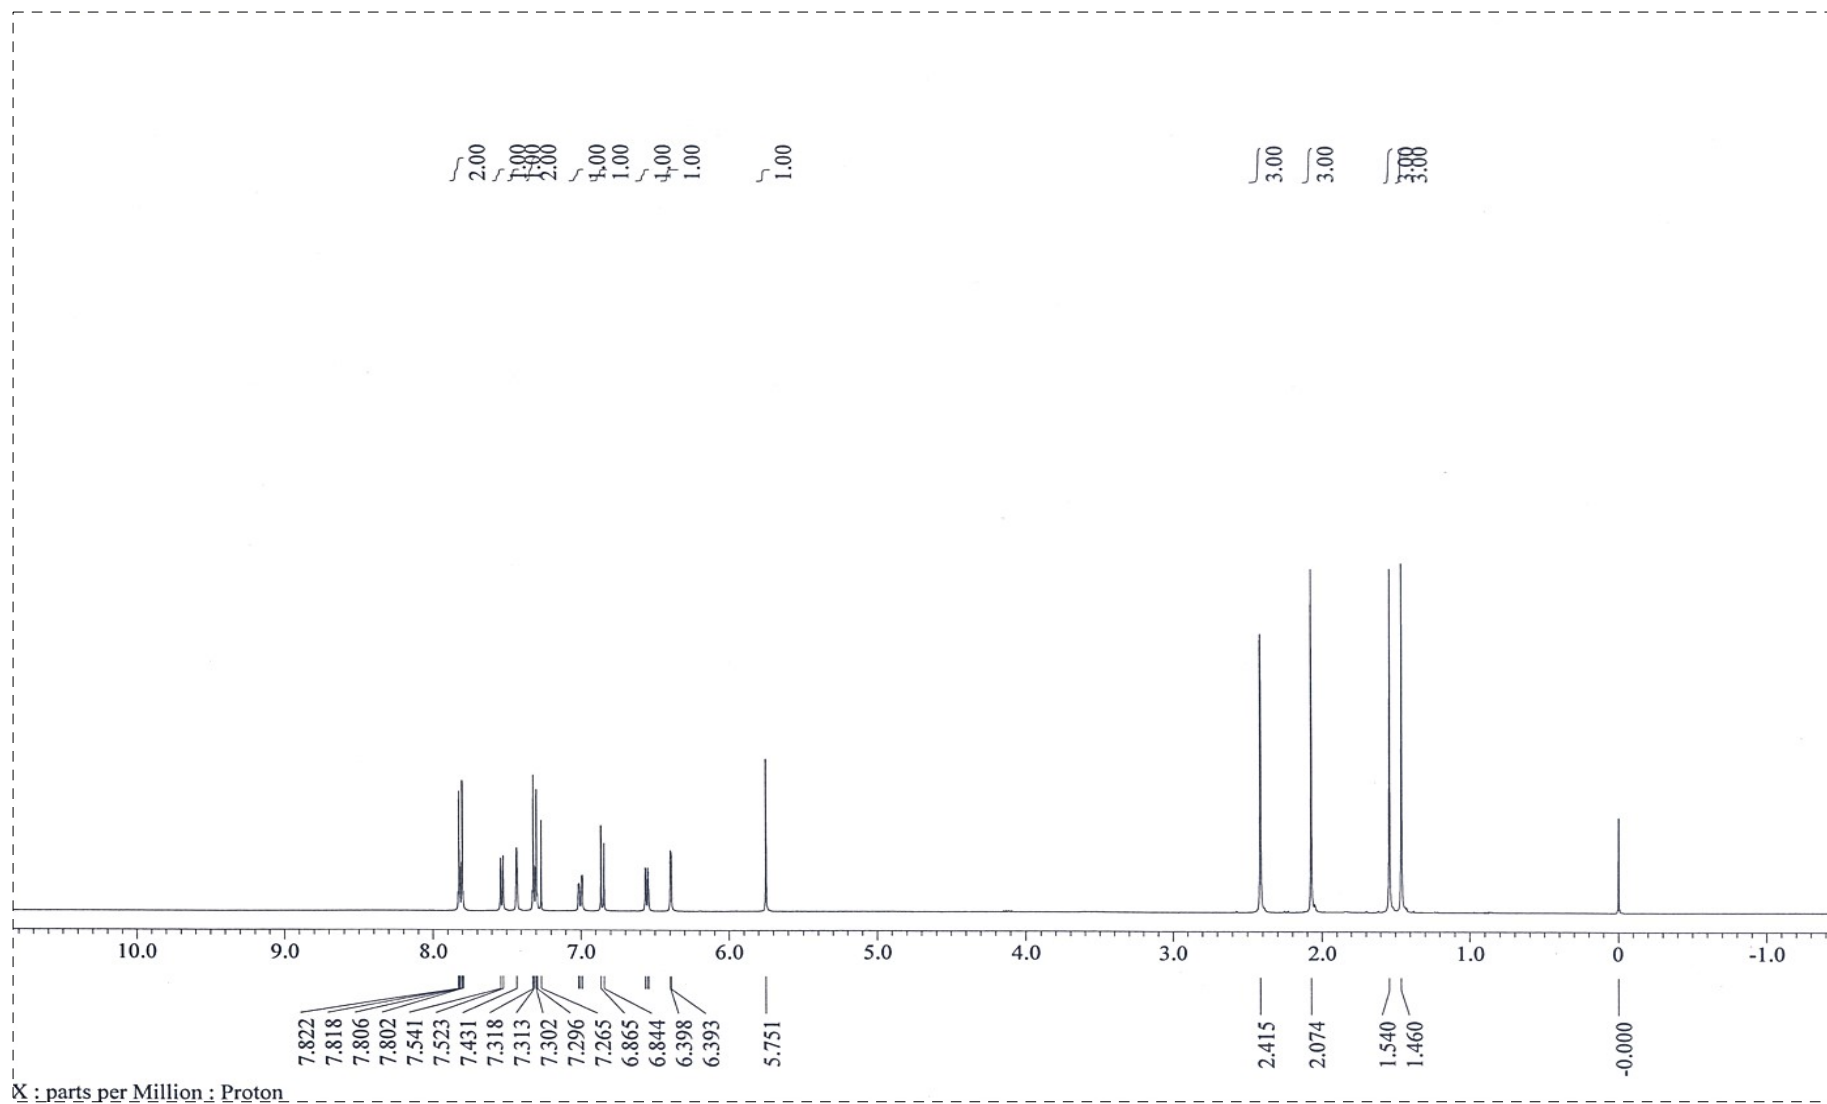

**Fig S22:**  $^1\text{H}$  NMR of 2-(4-chlorophenyl)-7-methyl-3-(2,2,6-trimethyl-2H-chromen-4-yl)-imidazo-[1,2-a]pyridine (**16h**)

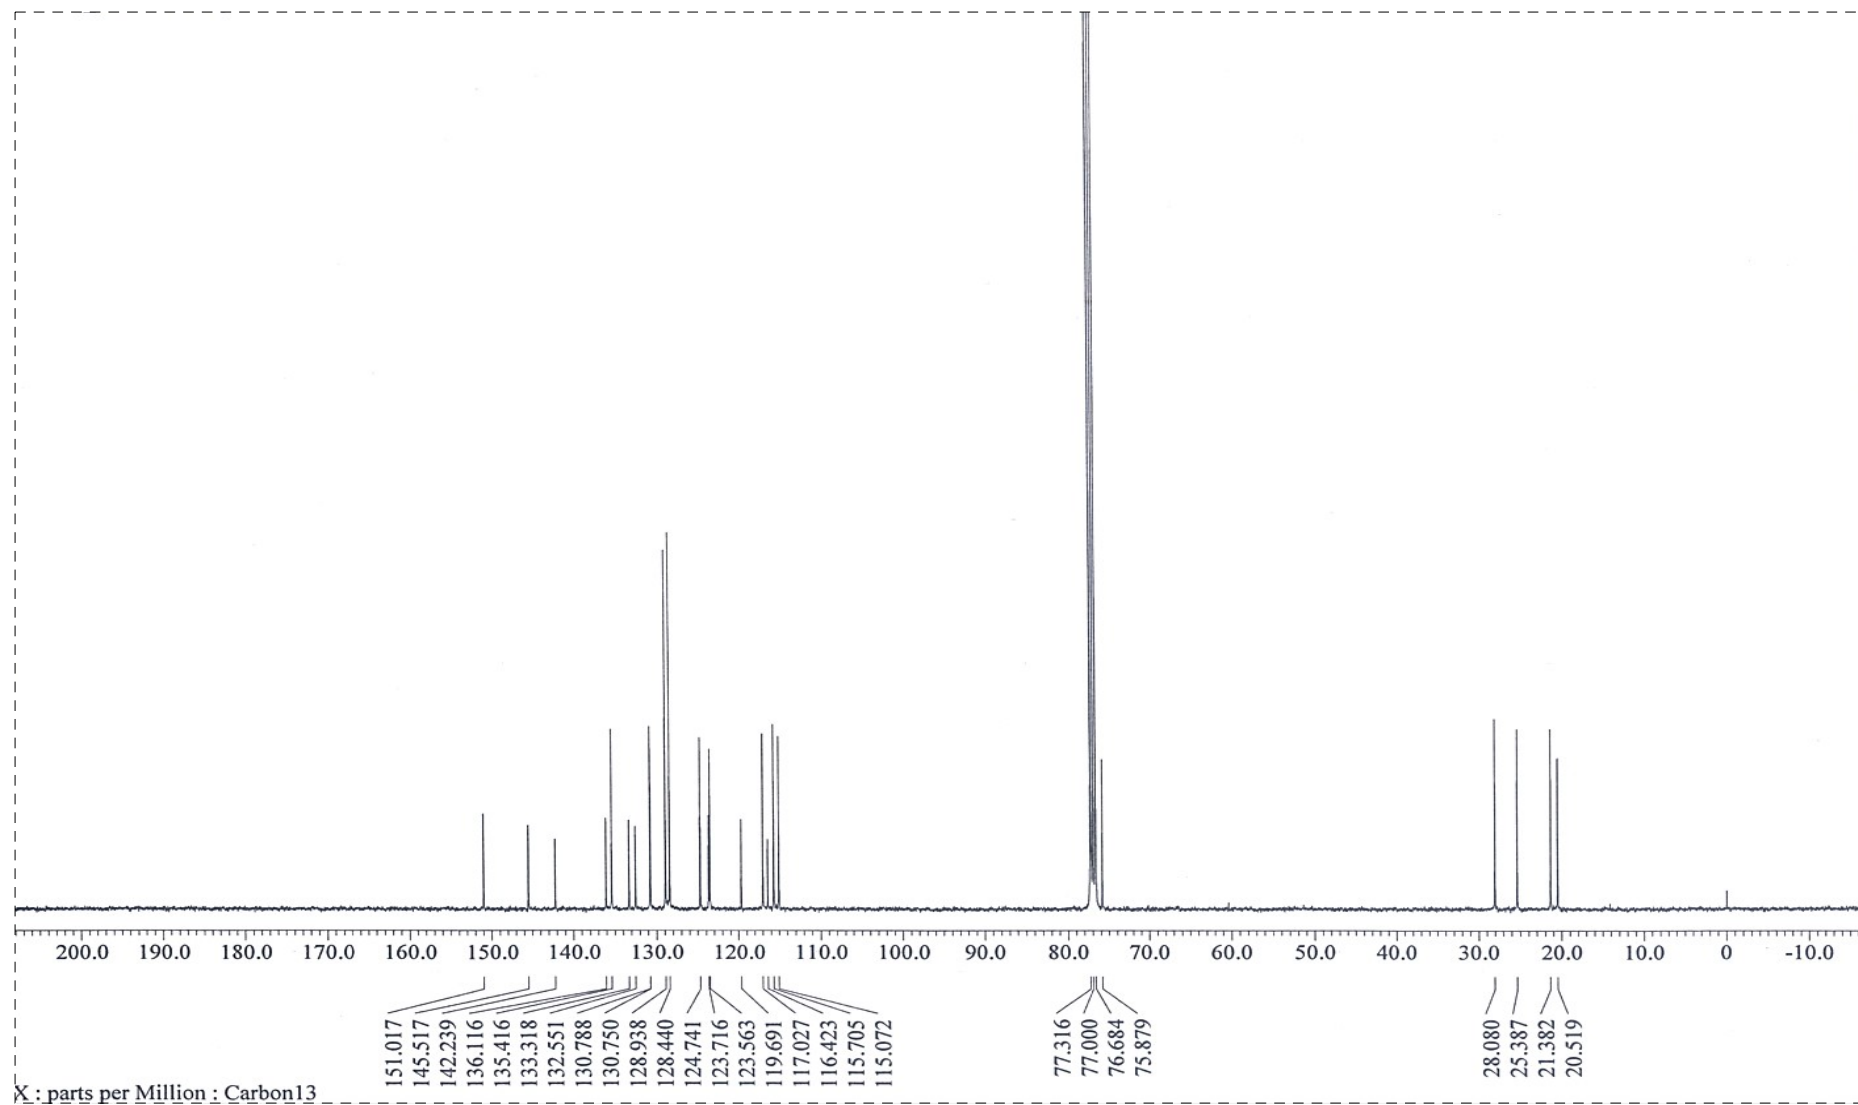

**Fig S23:**  $^{13}\text{C}$  NMR of 2-(4-chlorophenyl)-7-methyl-3-(2,2,6-trimethyl-2H-chromen-4-yl)-imidazo-[1,2-a]pyridine (**16h**)



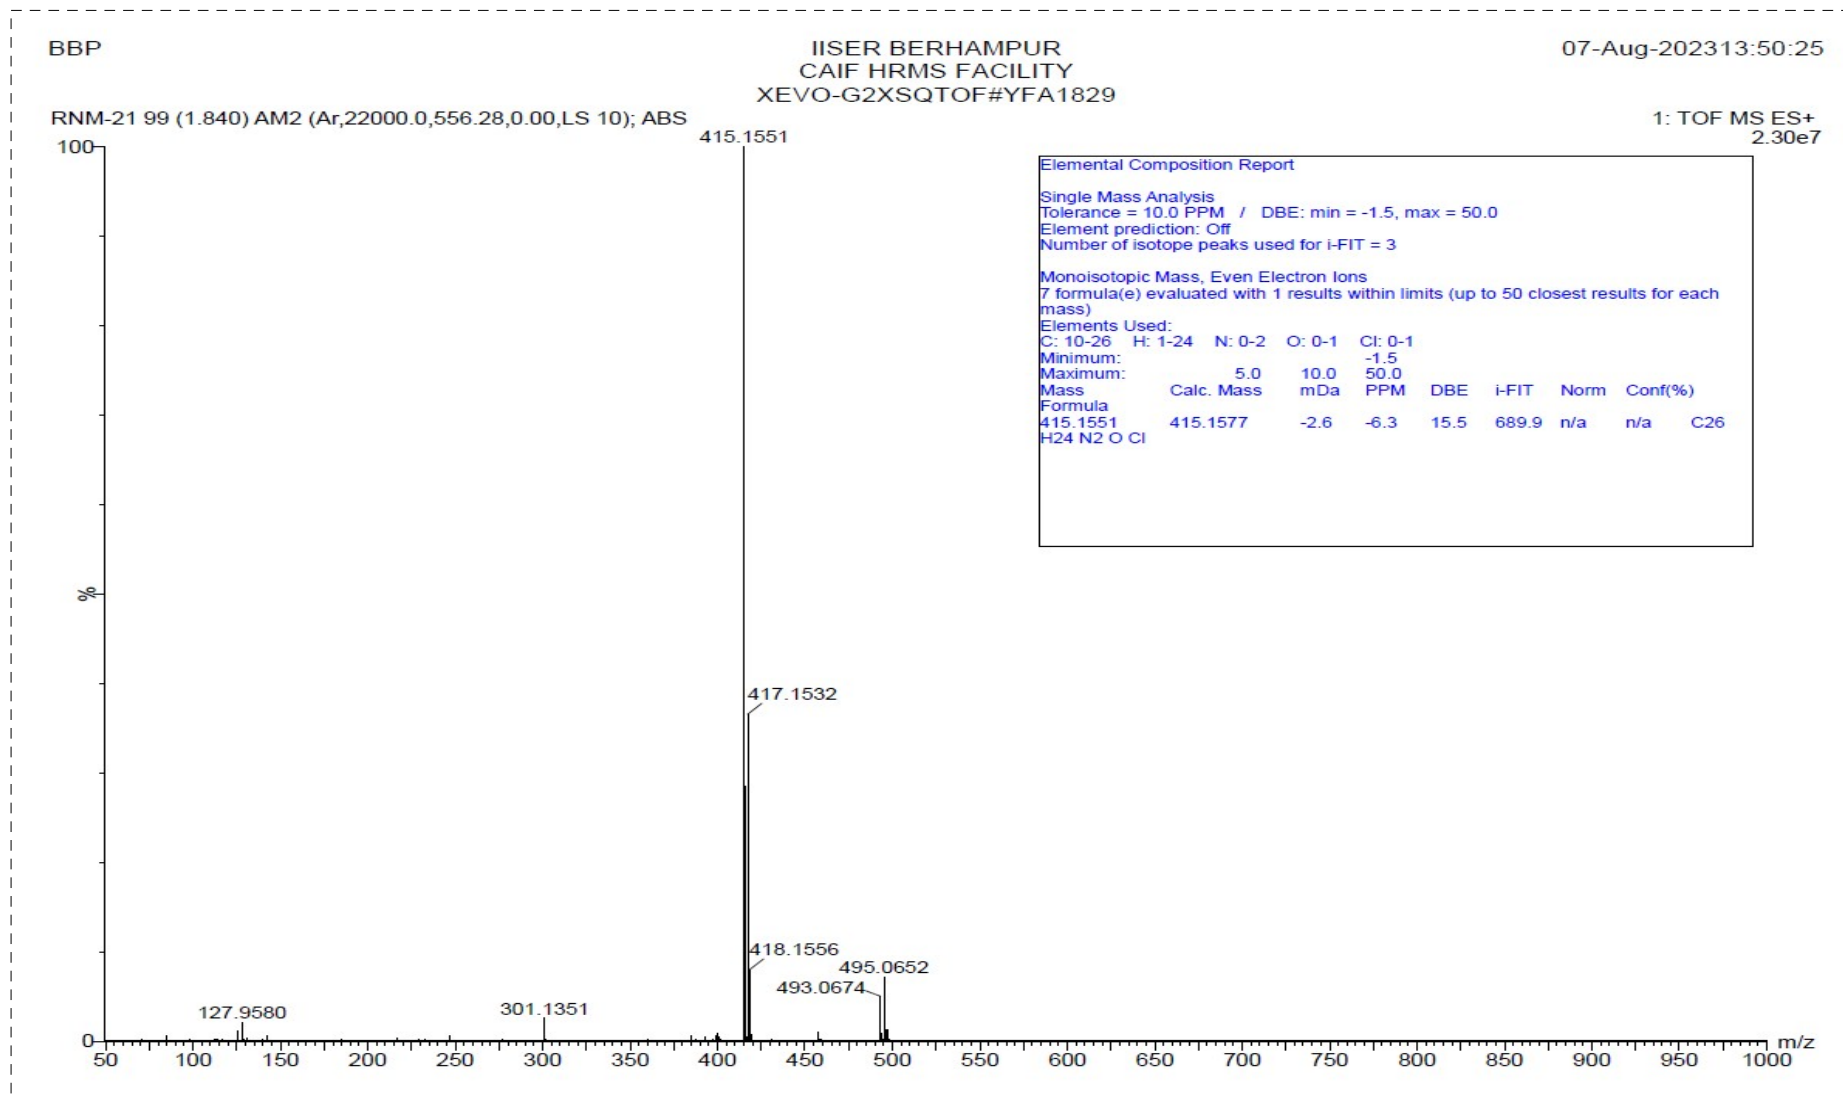

Fig S24: HR-MS of 2-(4-chlorophenyl)-7-methyl-3-(2,2,6-trimethyl-2H-chromen-4-yl)-imidazo-[1,2-a]pyridine (16h)

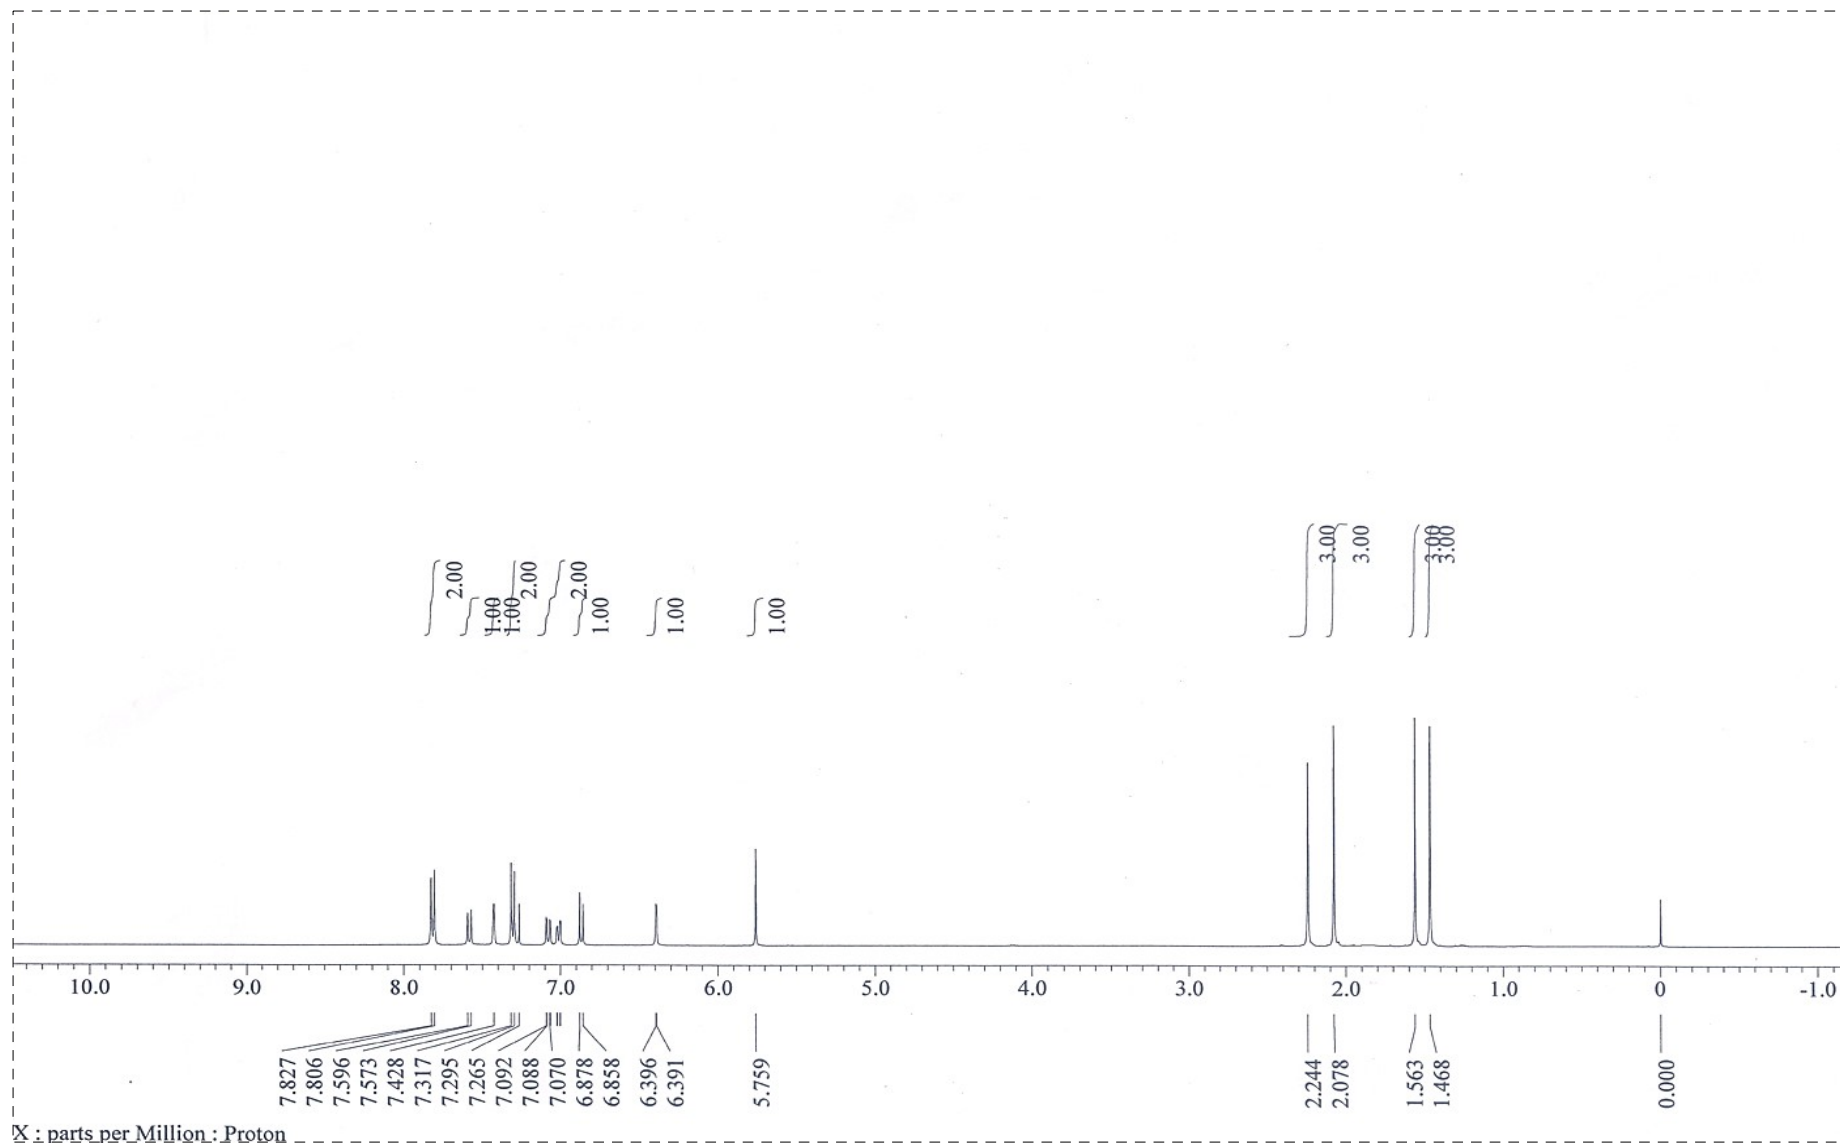

**Fig S25:**  $^1\text{H}$  NMR of 2-(4-chlorophenyl)-6-methyl-3-(2,2,6-trimethyl-2H-chromen-4-yl)-imidazo-[1,2-a]pyridine (**16i**)

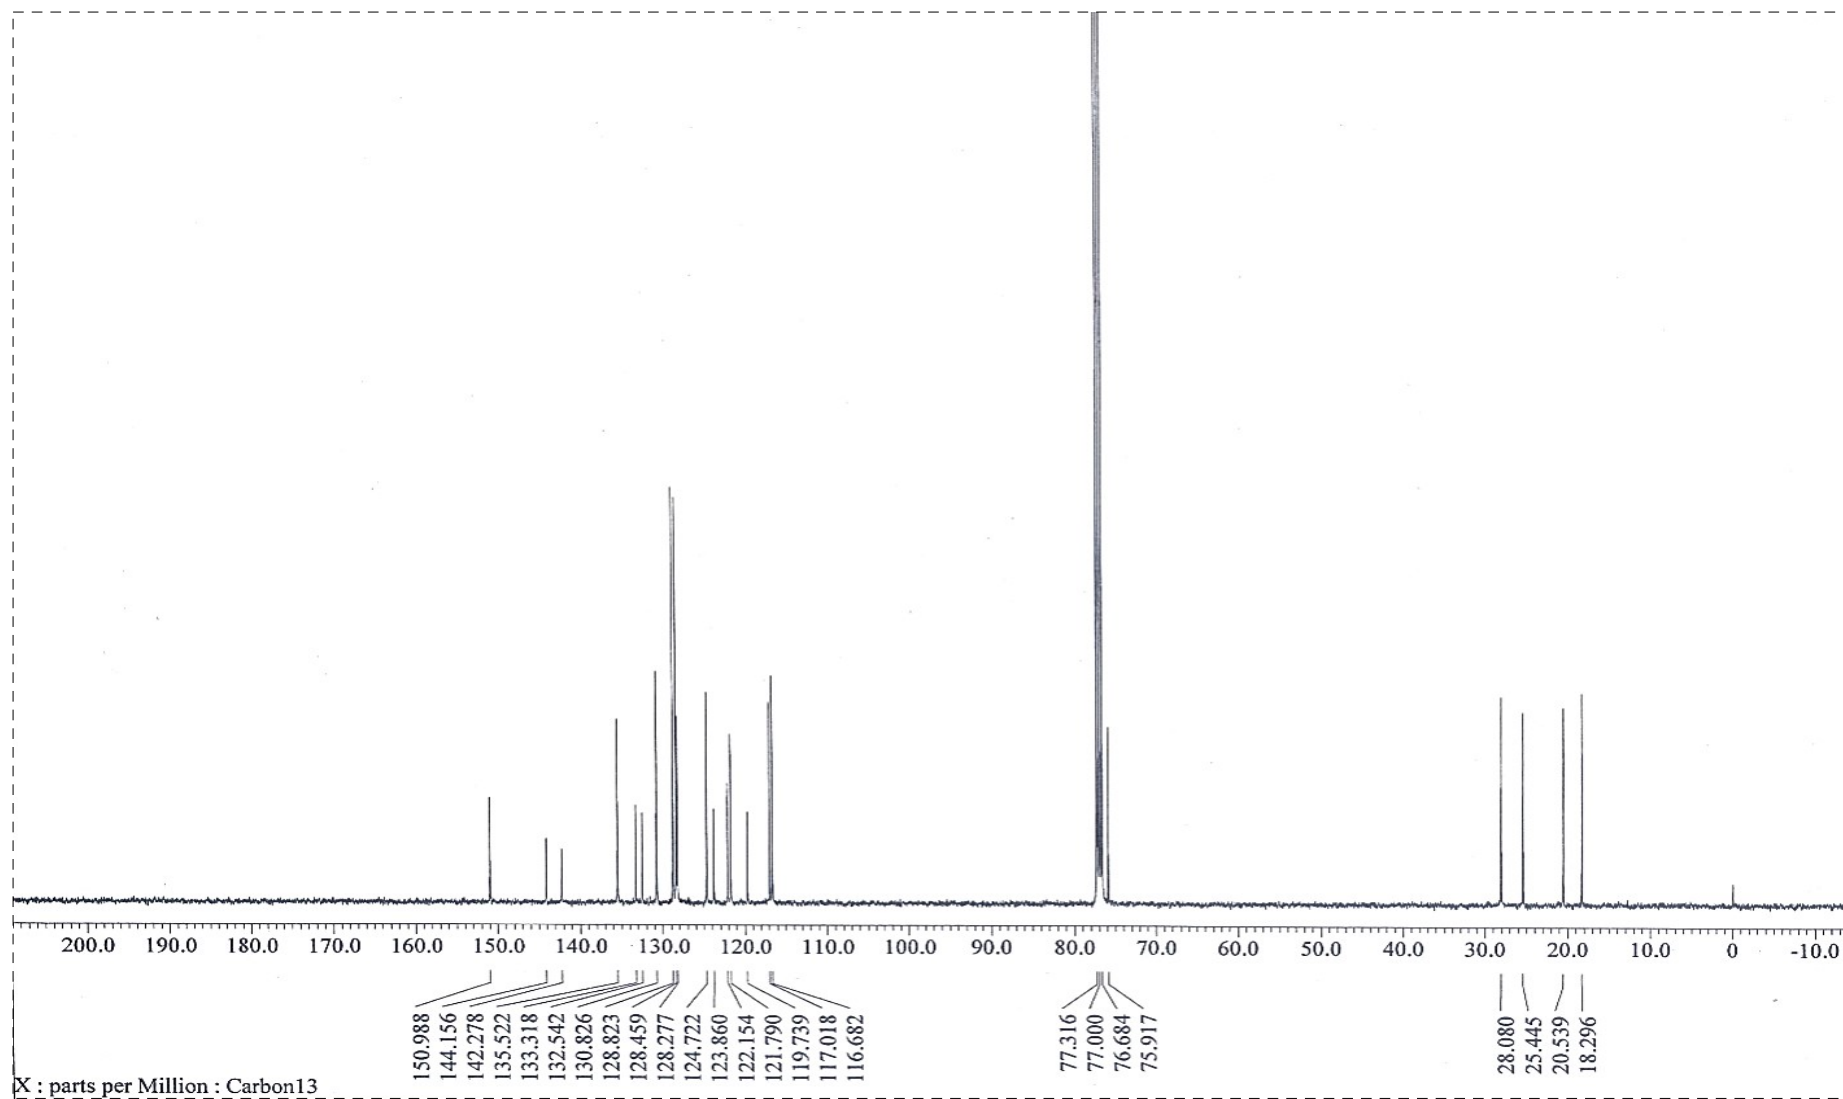

**Fig S26:**  $^{13}\text{C}$  NMR of 2-(4-chlorophenyl)-6-methyl-3-(2,2,6-trimethyl-2H-chromen-4-yl)-imidazo-[1,2-a]pyridine (**16i**)

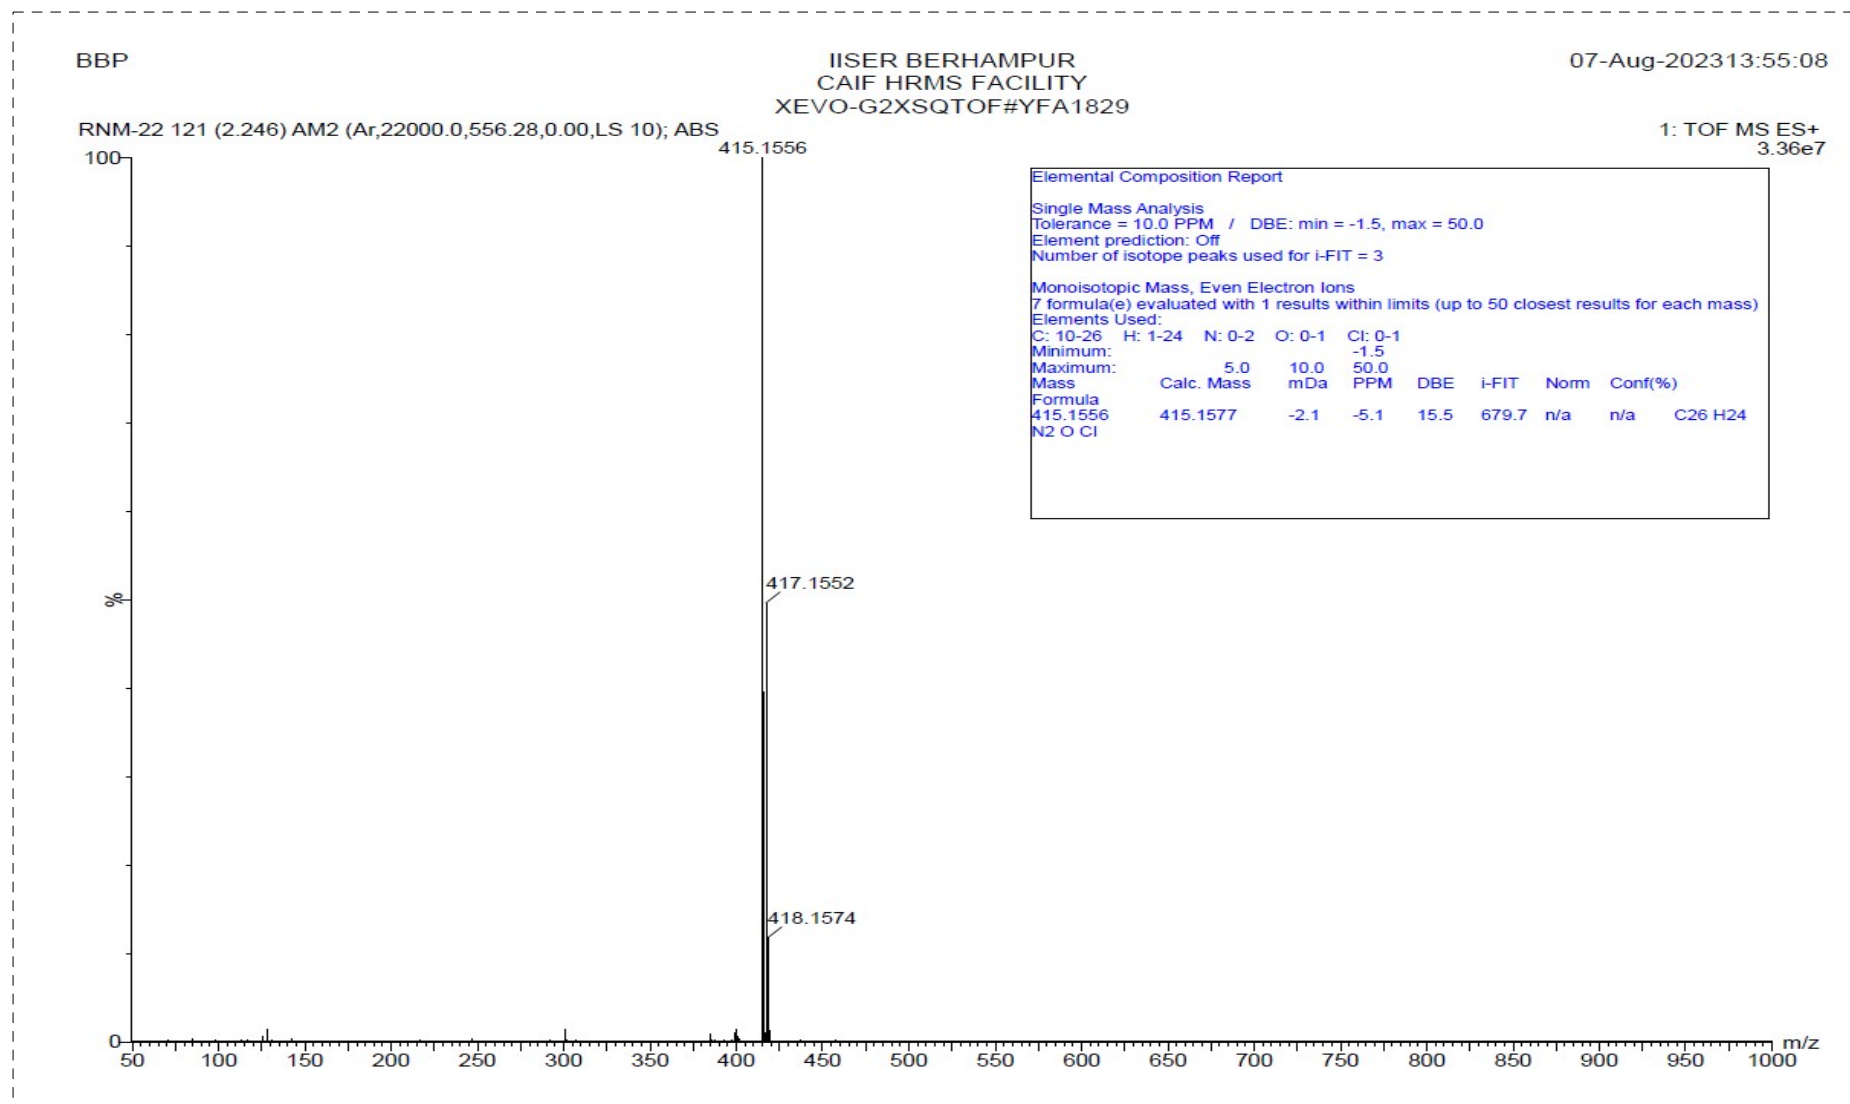

Fig S27: HR-MS of 2-(4-chlorophenyl)-6-methyl-3-(2,2,6-trimethyl-2H-chromen-4-yl)-imidazo-[1,2-a]pyridine (**16i**)

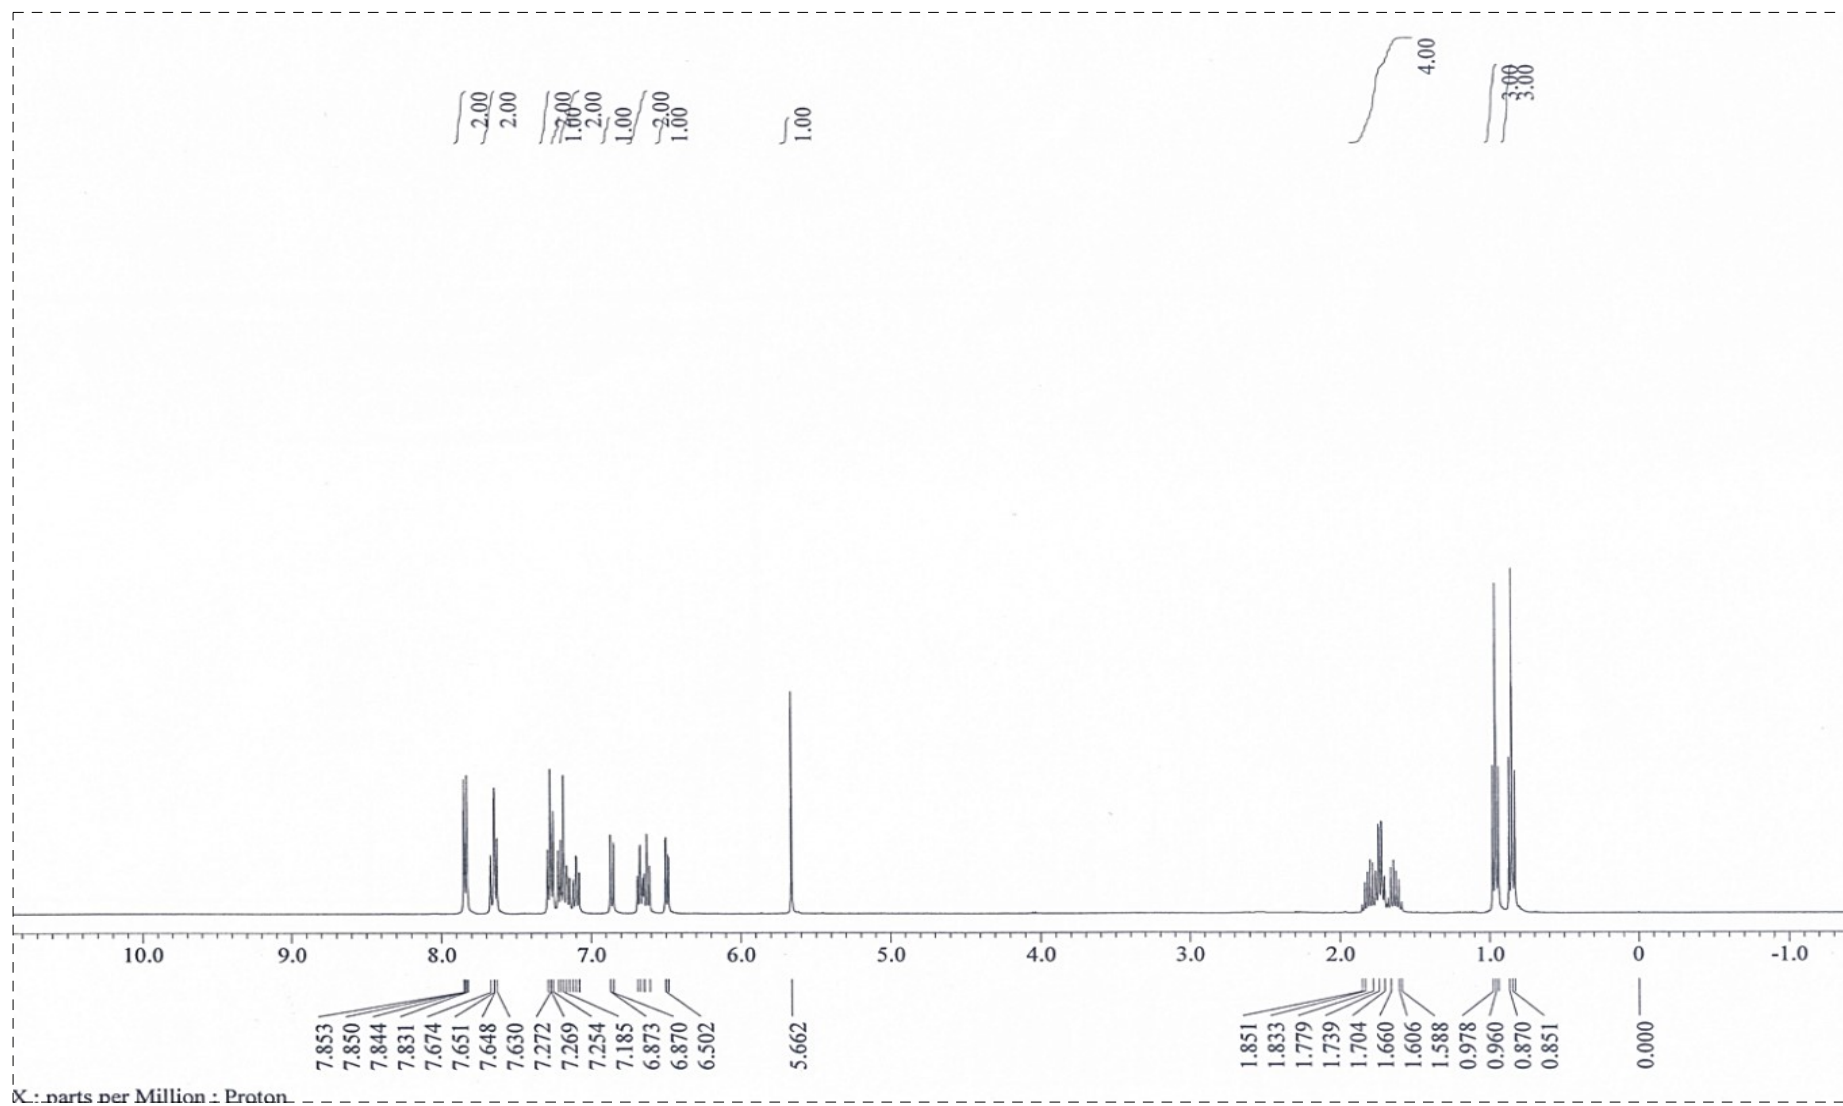

**Fig S28:**  $^1\text{H}$  NMR of 3-(2, 2-diethyl-2H-chromen-4-yl)-2-phenylimidazo-[1,2-a]pyridine (**16j**)

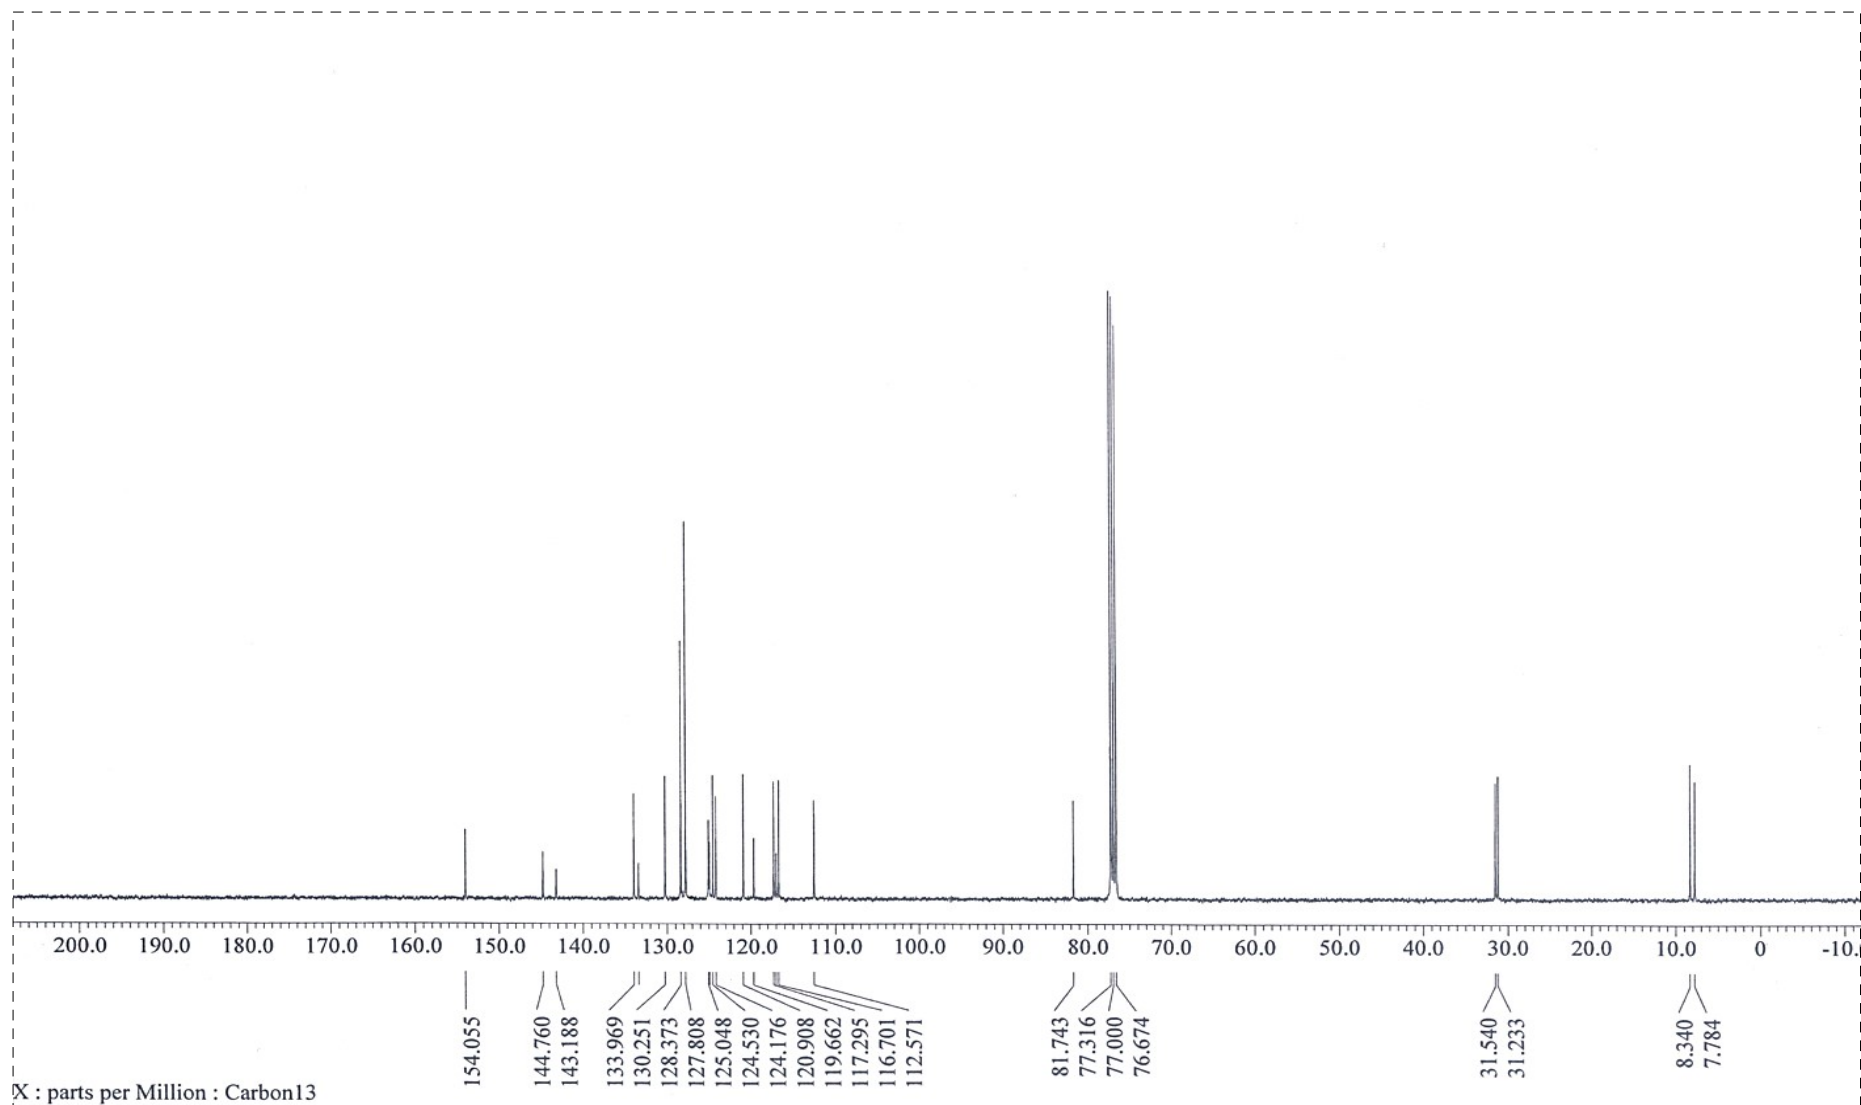

**Fig S29:**  $^{13}\text{C}$  NMR of 3-(2, 2-diethyl-2H-chromen-4-yl)-2-phenylimidazo-[1,2-a]pyridine (**16j**)

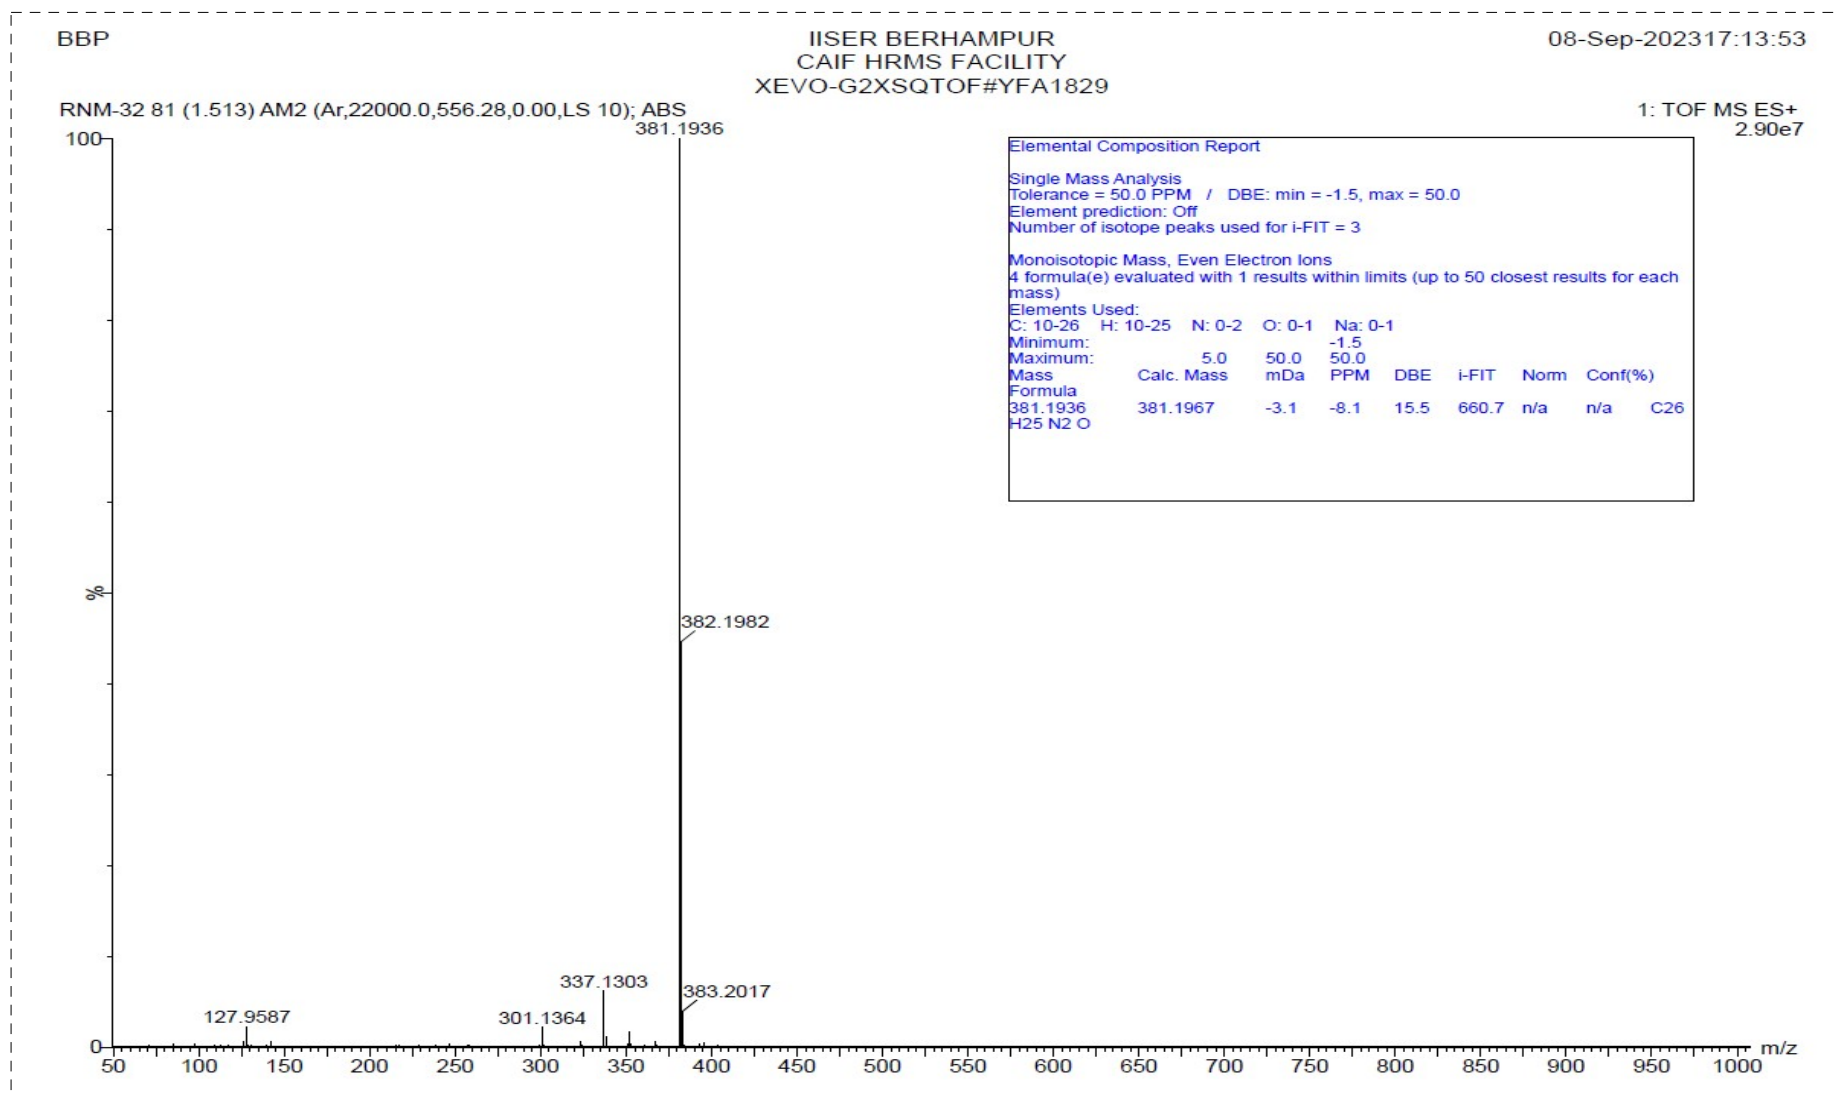

**Fig S30:** HR-MS of 3-(2, 2-diethyl-2H-chromen-4-yl)-2-phenylimidazo-[1,2-a]pyridine (**16j**)

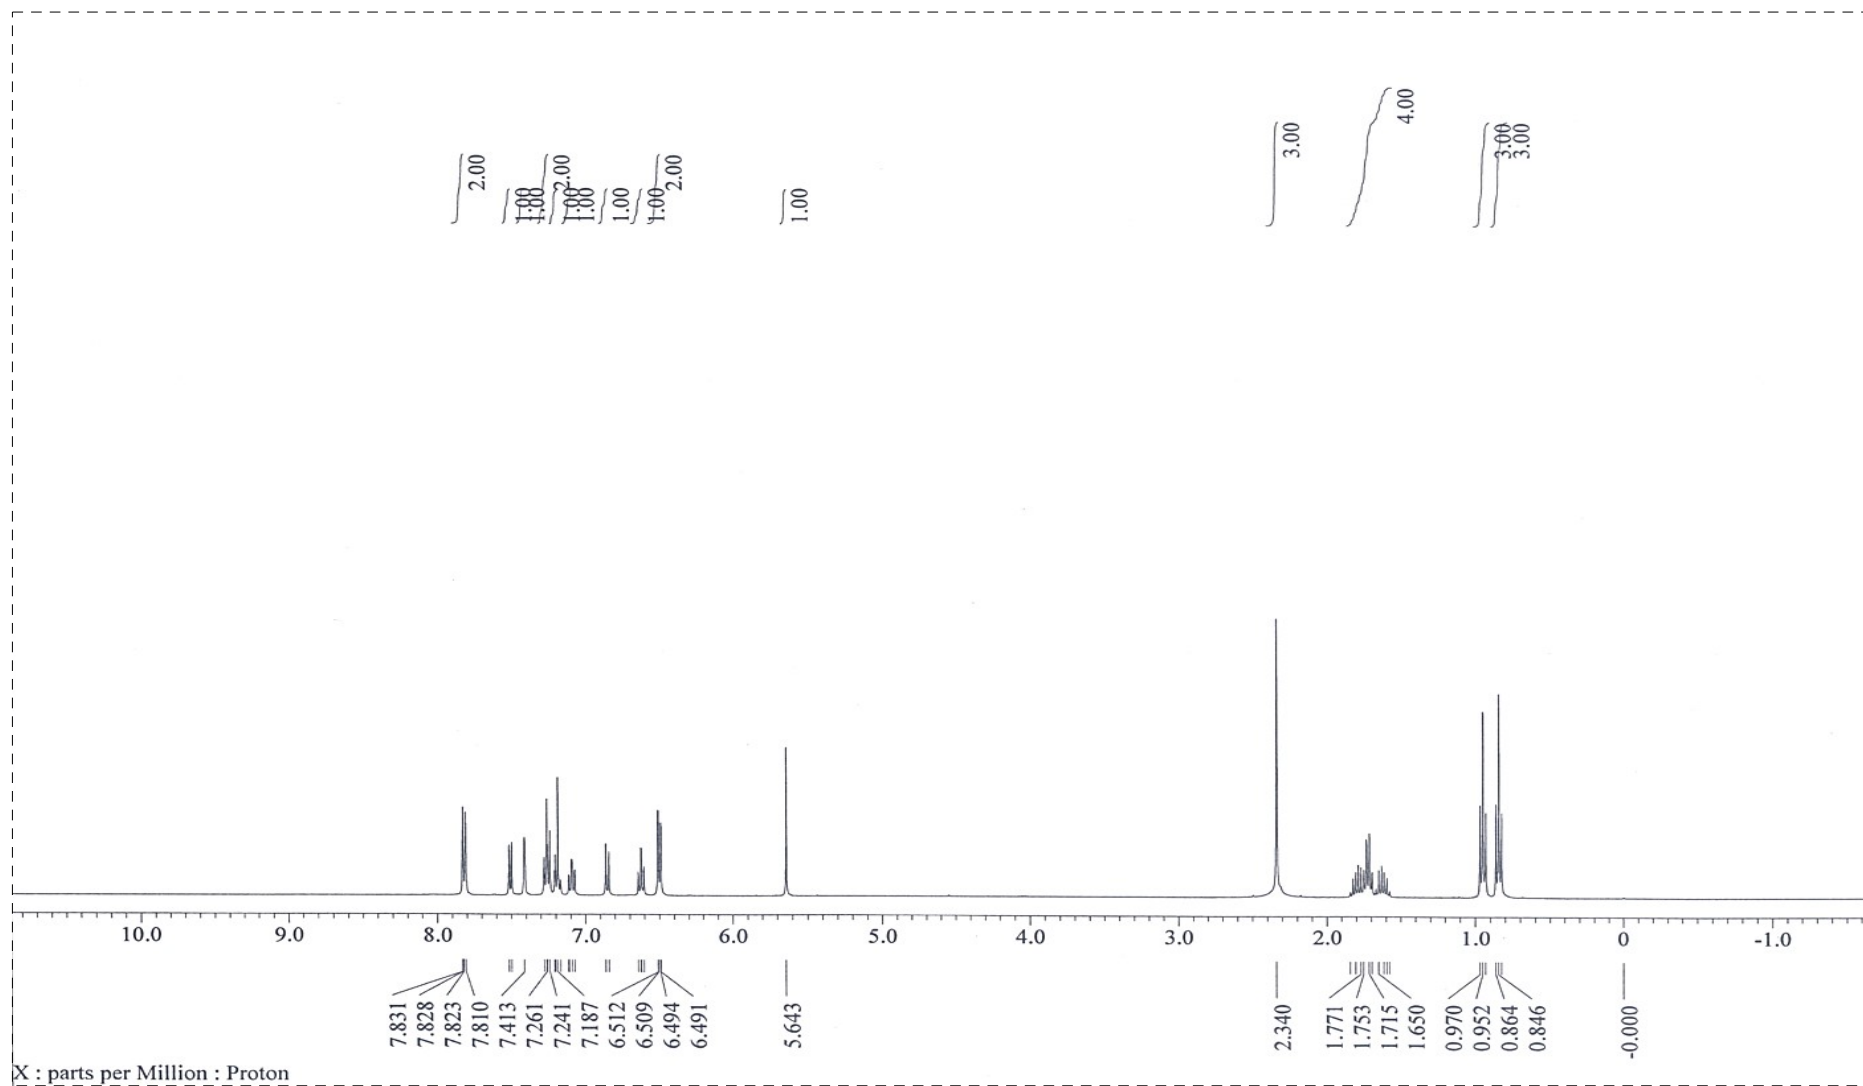

**Fig S31:**  $^1\text{H}$  NMR of 3-(2, 2-diethyl-2H-chromen-4-yl)-7-methyl-2-phenylimidazo-[1,2-a]pyridine (**16k**)



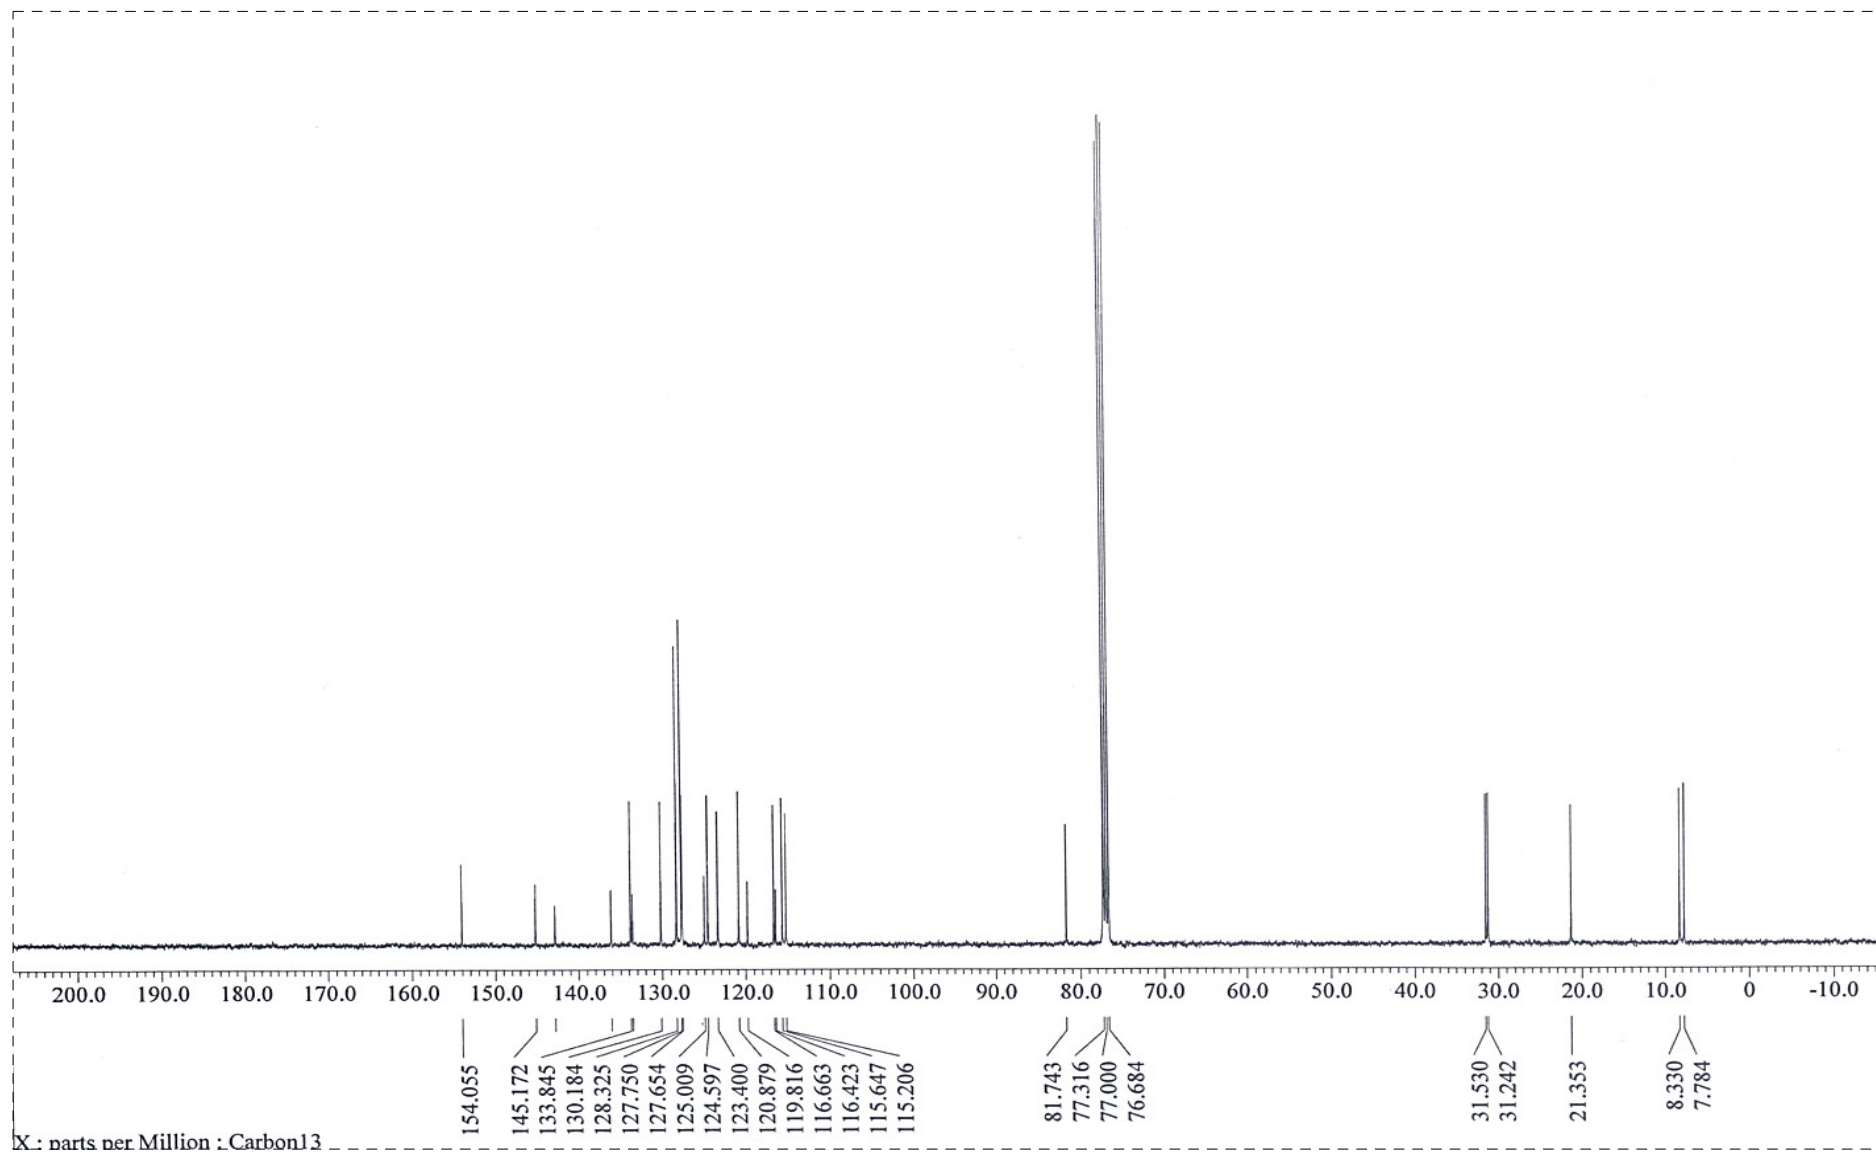

**Fig S32:**  $^{13}\text{C}$  NMR of 3-(2, 2-diethyl-2H-chromen-4-yl)-7-methyl-2-phenylimidazo-[1,2-a]pyridine (**16k**)

BBP

IISER BERHAMPUR  
CAIF HRMS FACILITY  
XEVO-G2XSQTOF#YFA1829

08-Sep-2023 17:18:39

RNM-33 79 (1.467) AM2 (Ar,22000.0,556.28,0.00,LS 10); ABS

1: TOF MS ES+  
2.23e7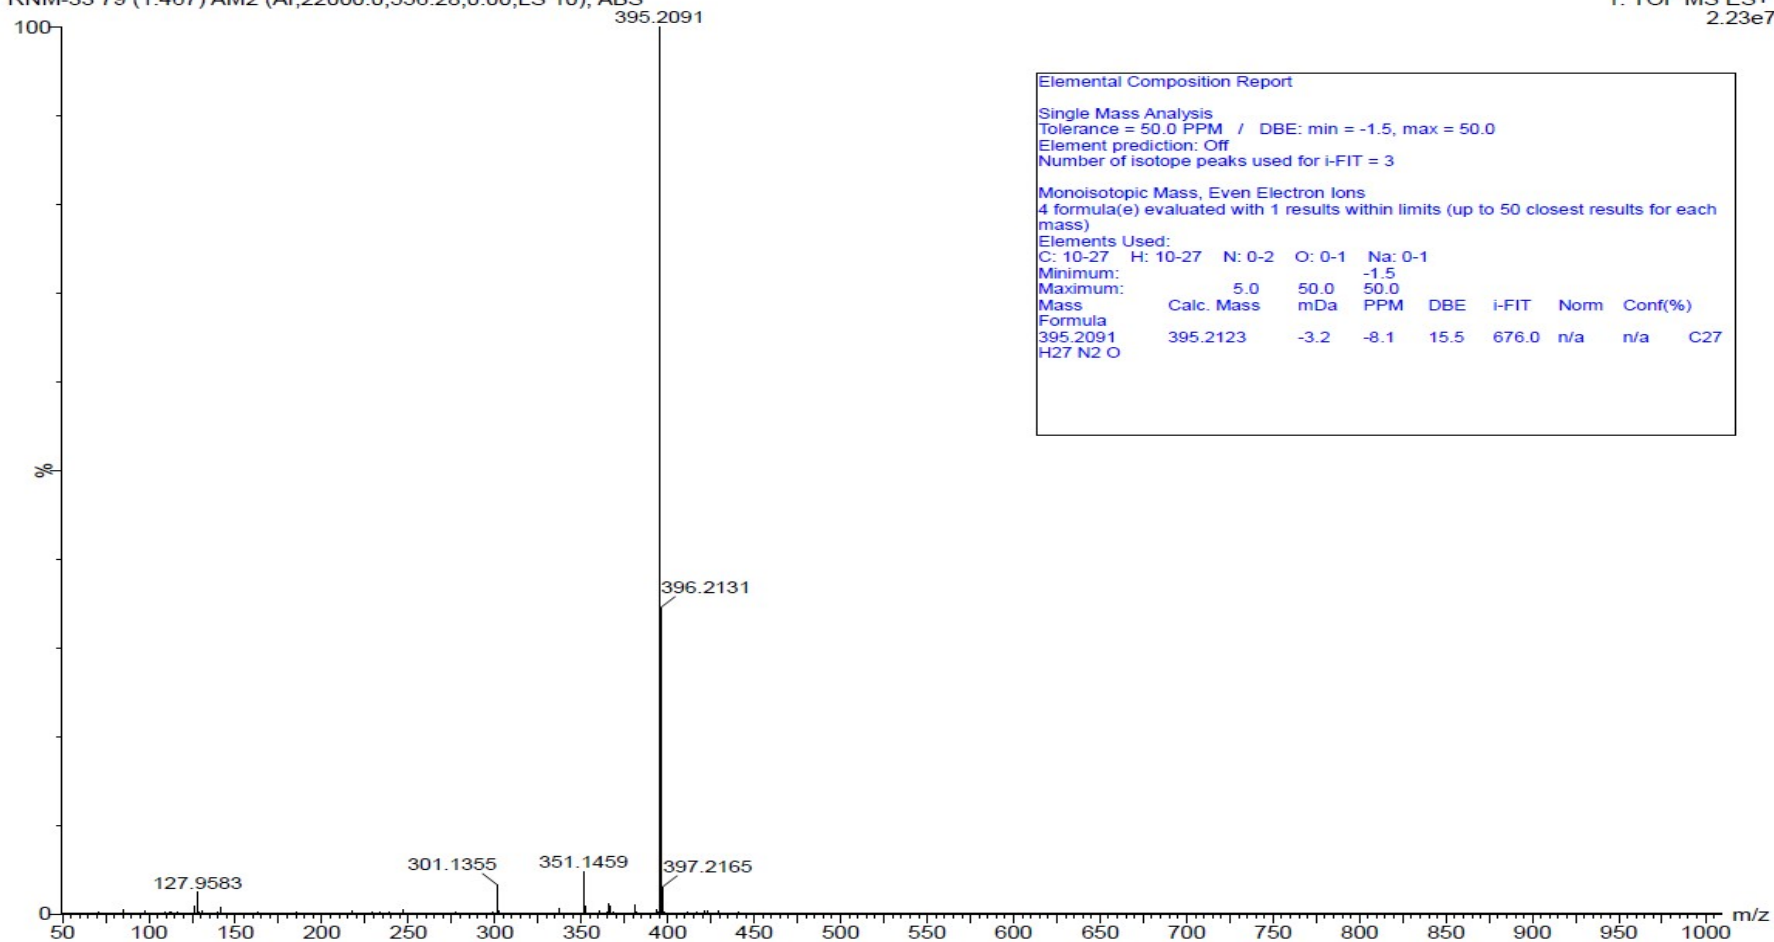

Fig S33: HR-MS of 3-(2, 2-diethyl-2H-chromen-4-yl)-7-methyl-2-phenylimidazo-[1,2-a]pyridine (16k)

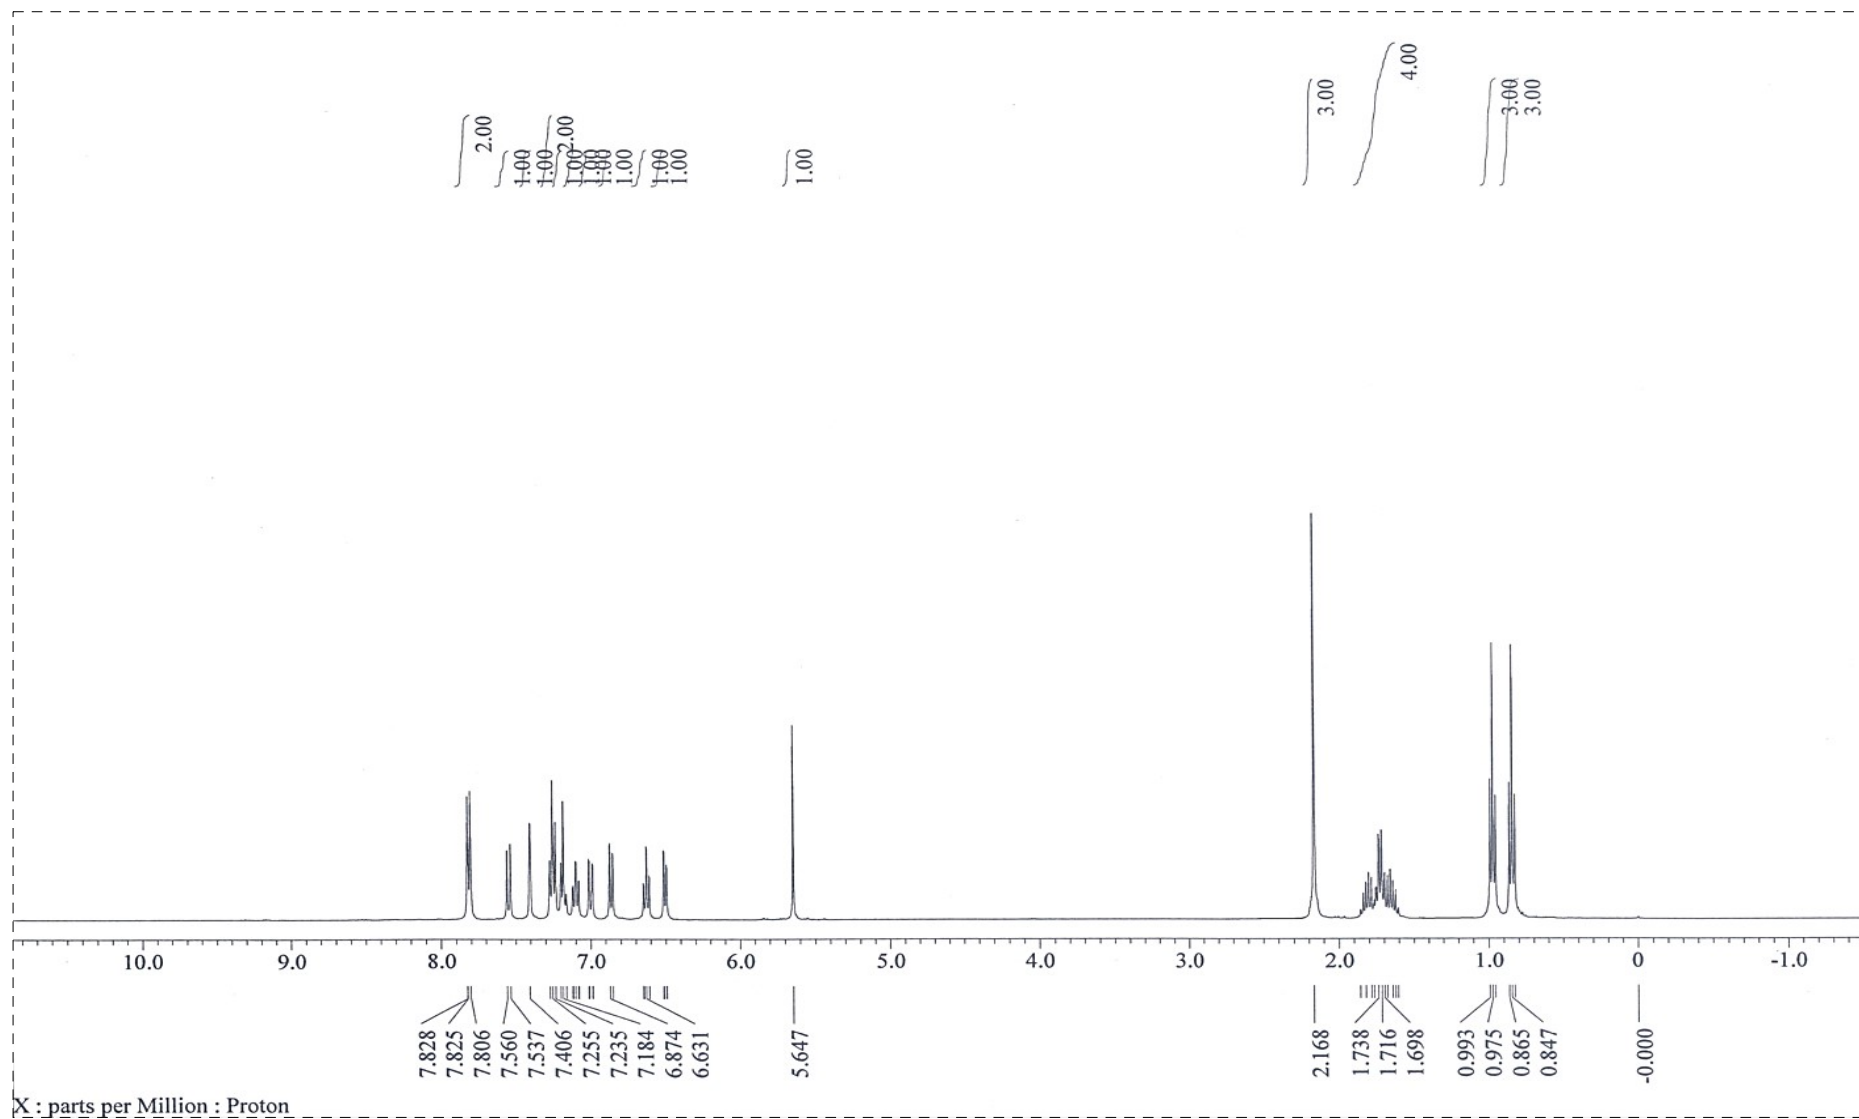

**Fig S34:**  $^1\text{H}$  NMR of 3-(2, 2-diethyl-2H-chromen-4-yl)-6-methyl-2-phenylimidazo-[1,2-a]pyridine (**16l**)

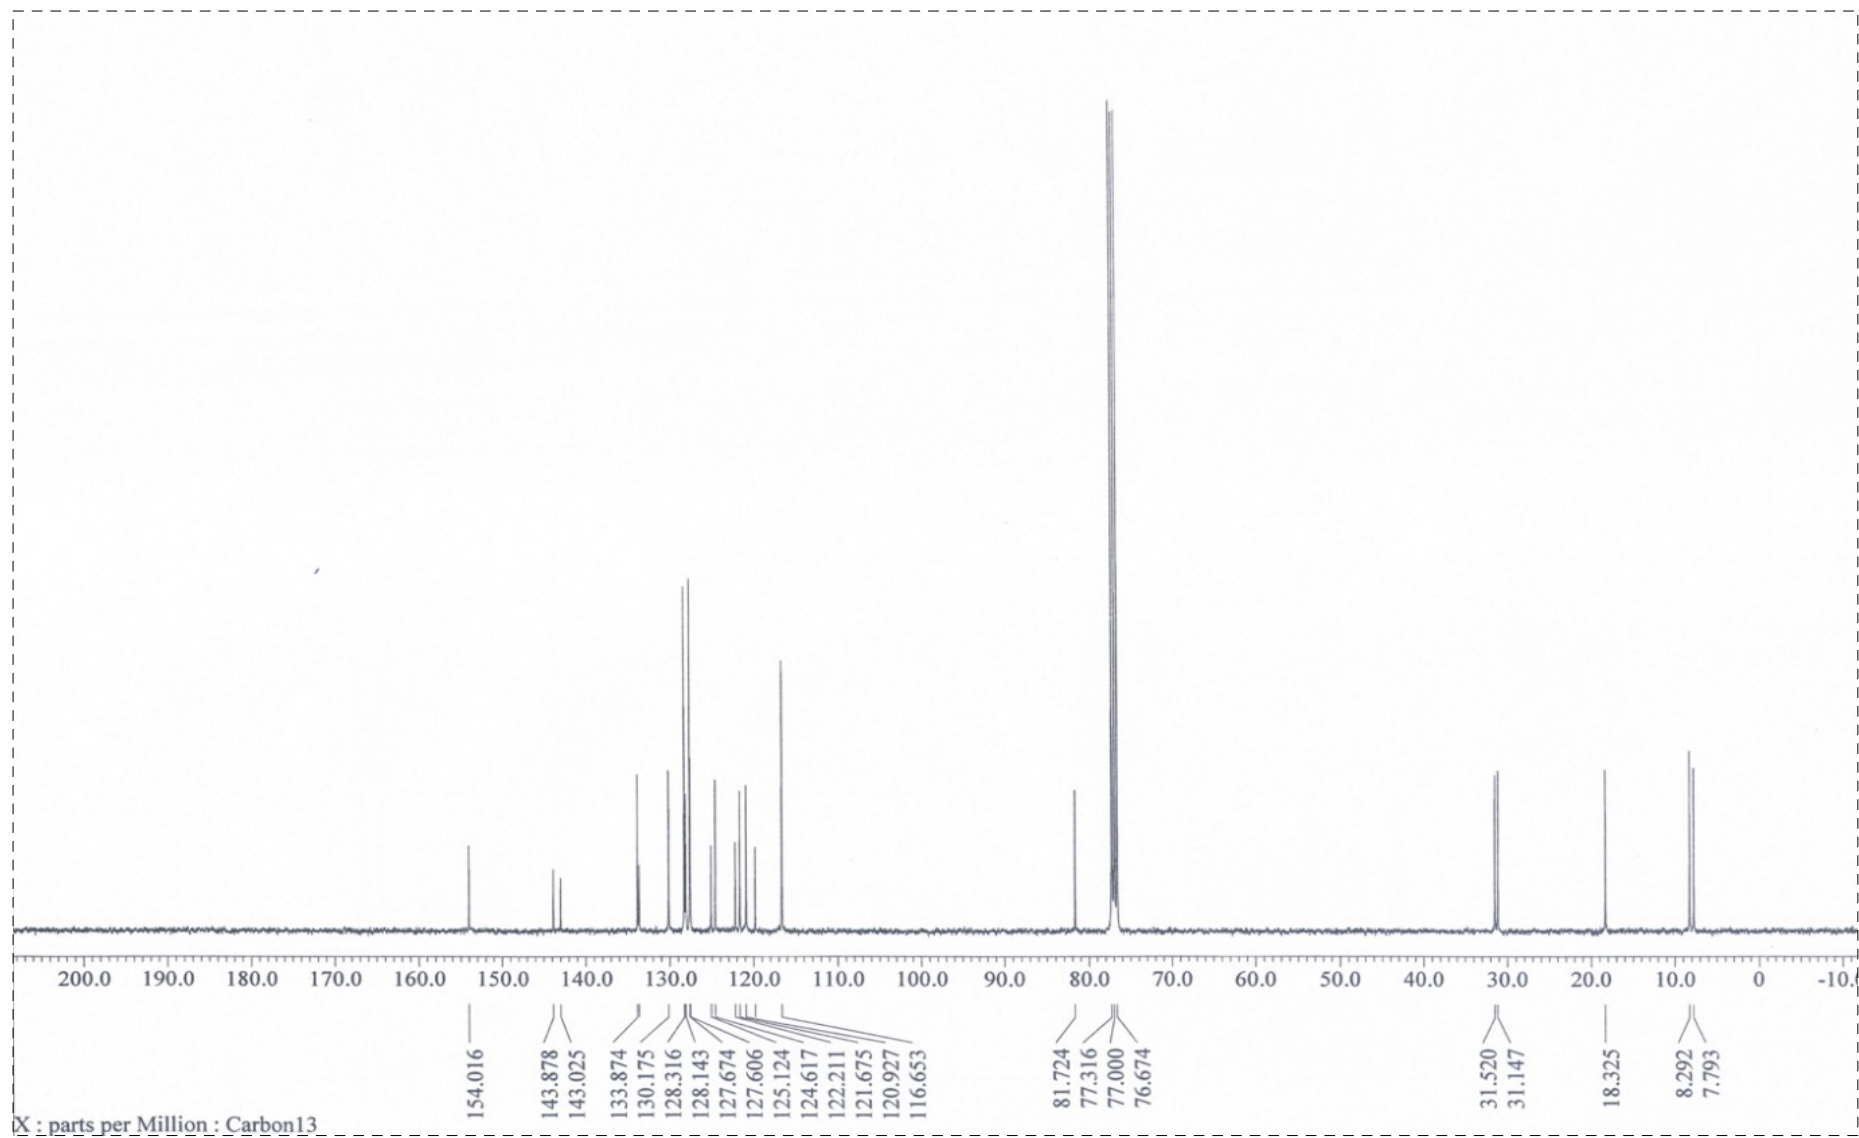

**Fig S35:**  $^{13}\text{C}$  NMR of 3-(2, 2-diethyl-2H-chromen-4-yl)-6-methyl-2-phenylimidazo-[1,2-a]pyridine (**16**)

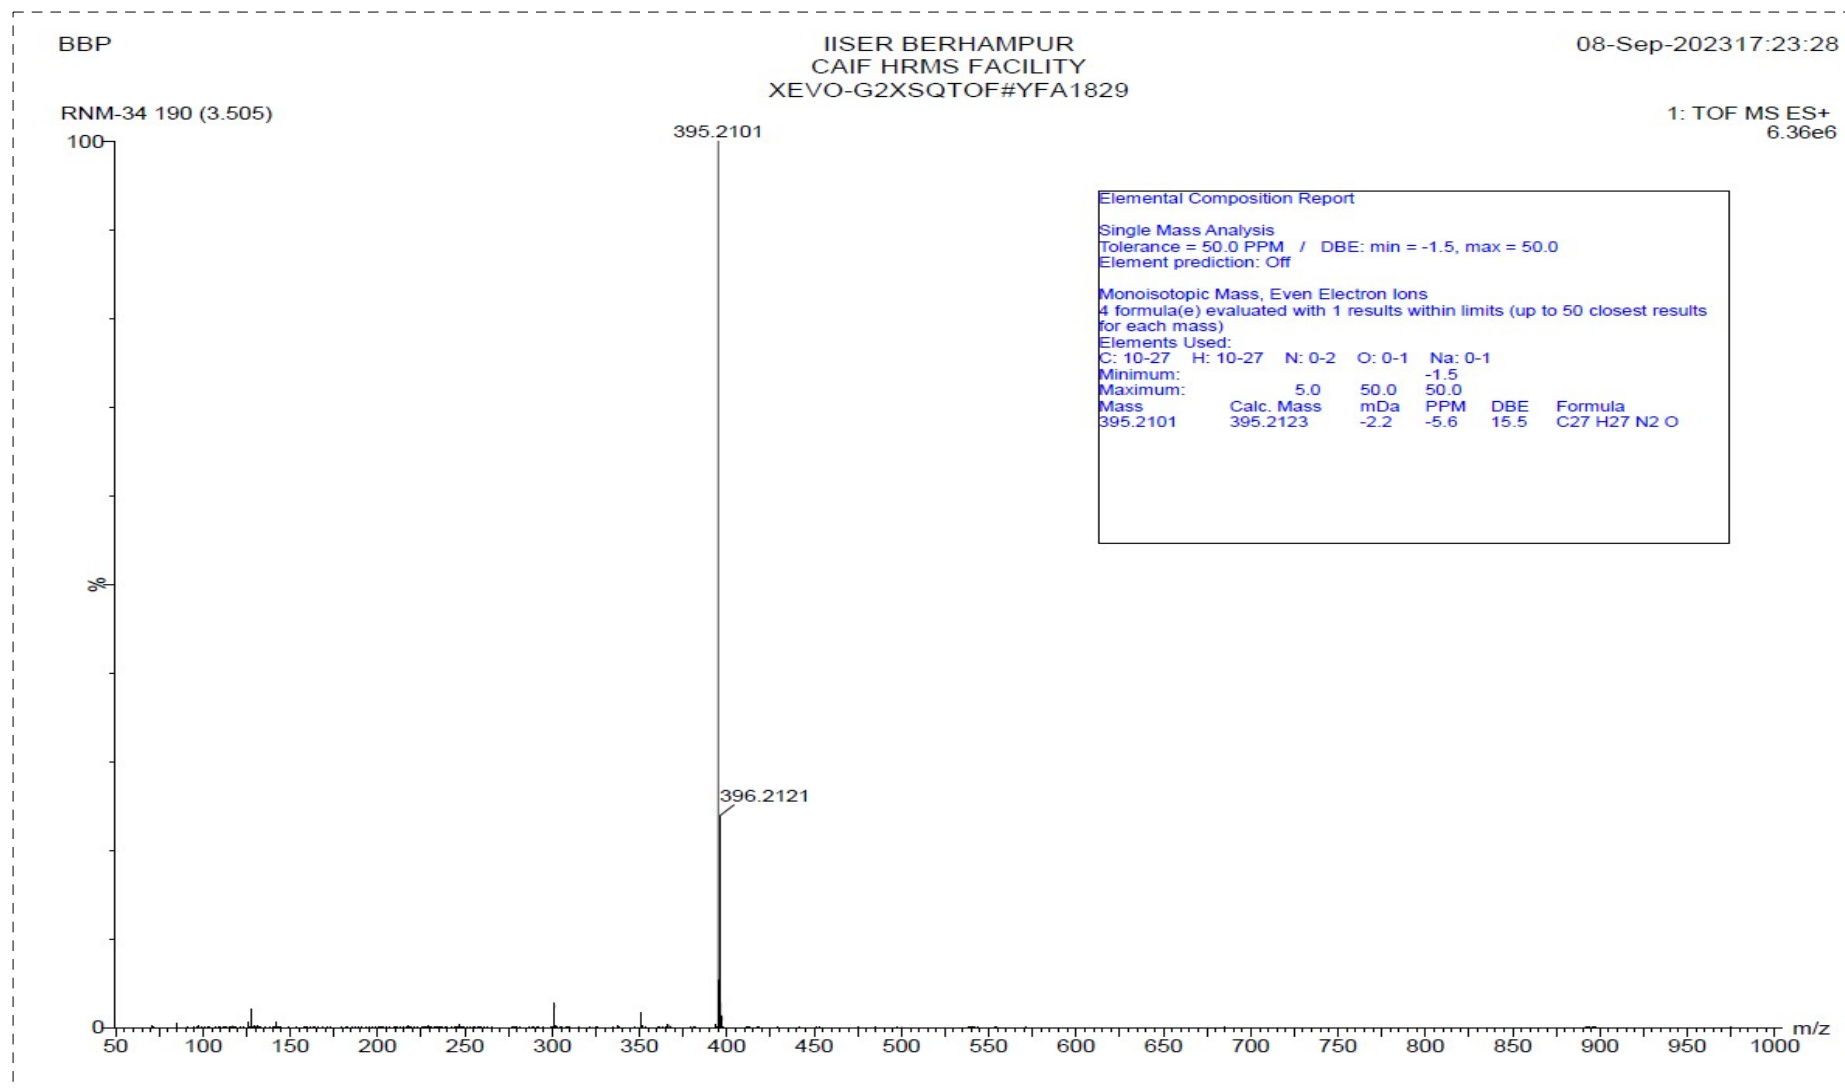

**Fig S36:** HR-MS of 3-(2, 2-diethyl-2H-chromen-4-yl)-6-methyl-2-phenylimidazo-[1,2-a]pyridine (**16l**)

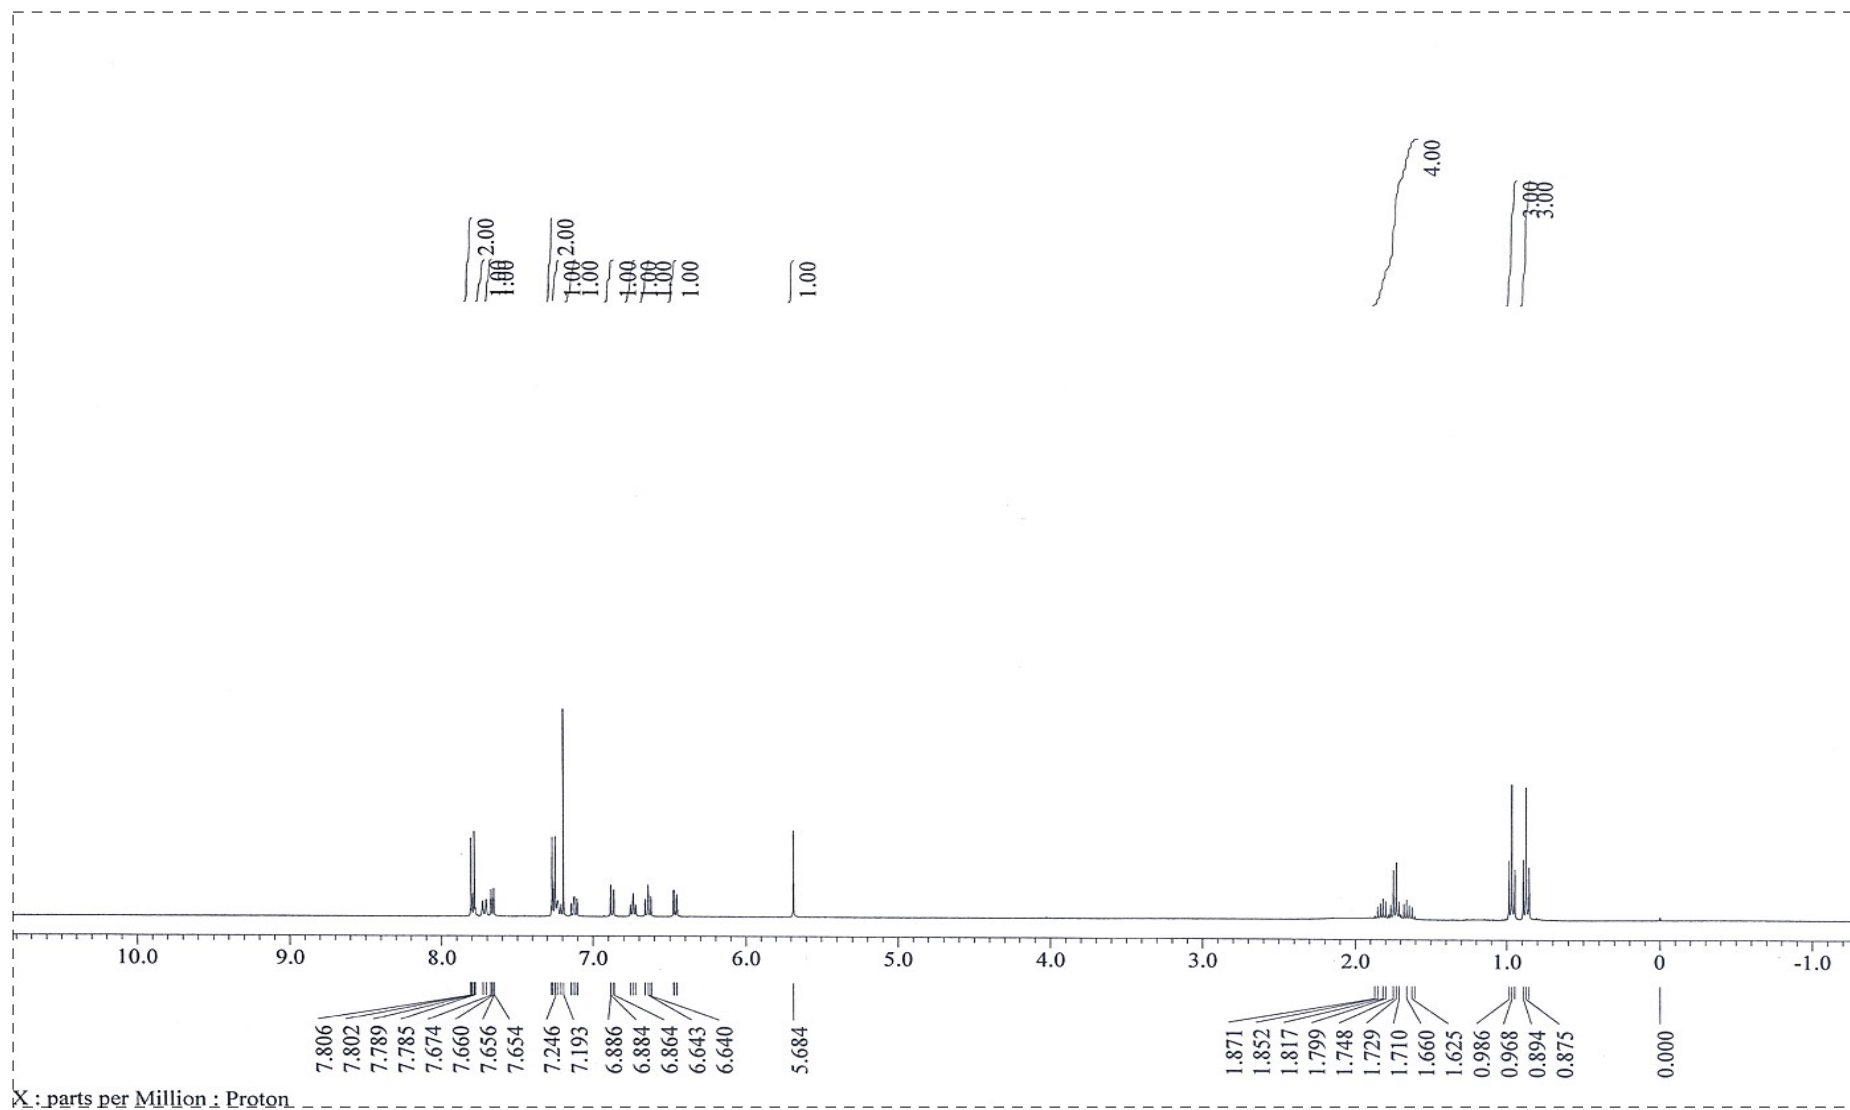

**Fig S37:**  $^1\text{H}$  NMR of 2-(4-Chlorophenyl)-3-(2,2-diethyl-2H-Chromen-4-yl)-imidazo[1,2-a]pyridine (**16m**)

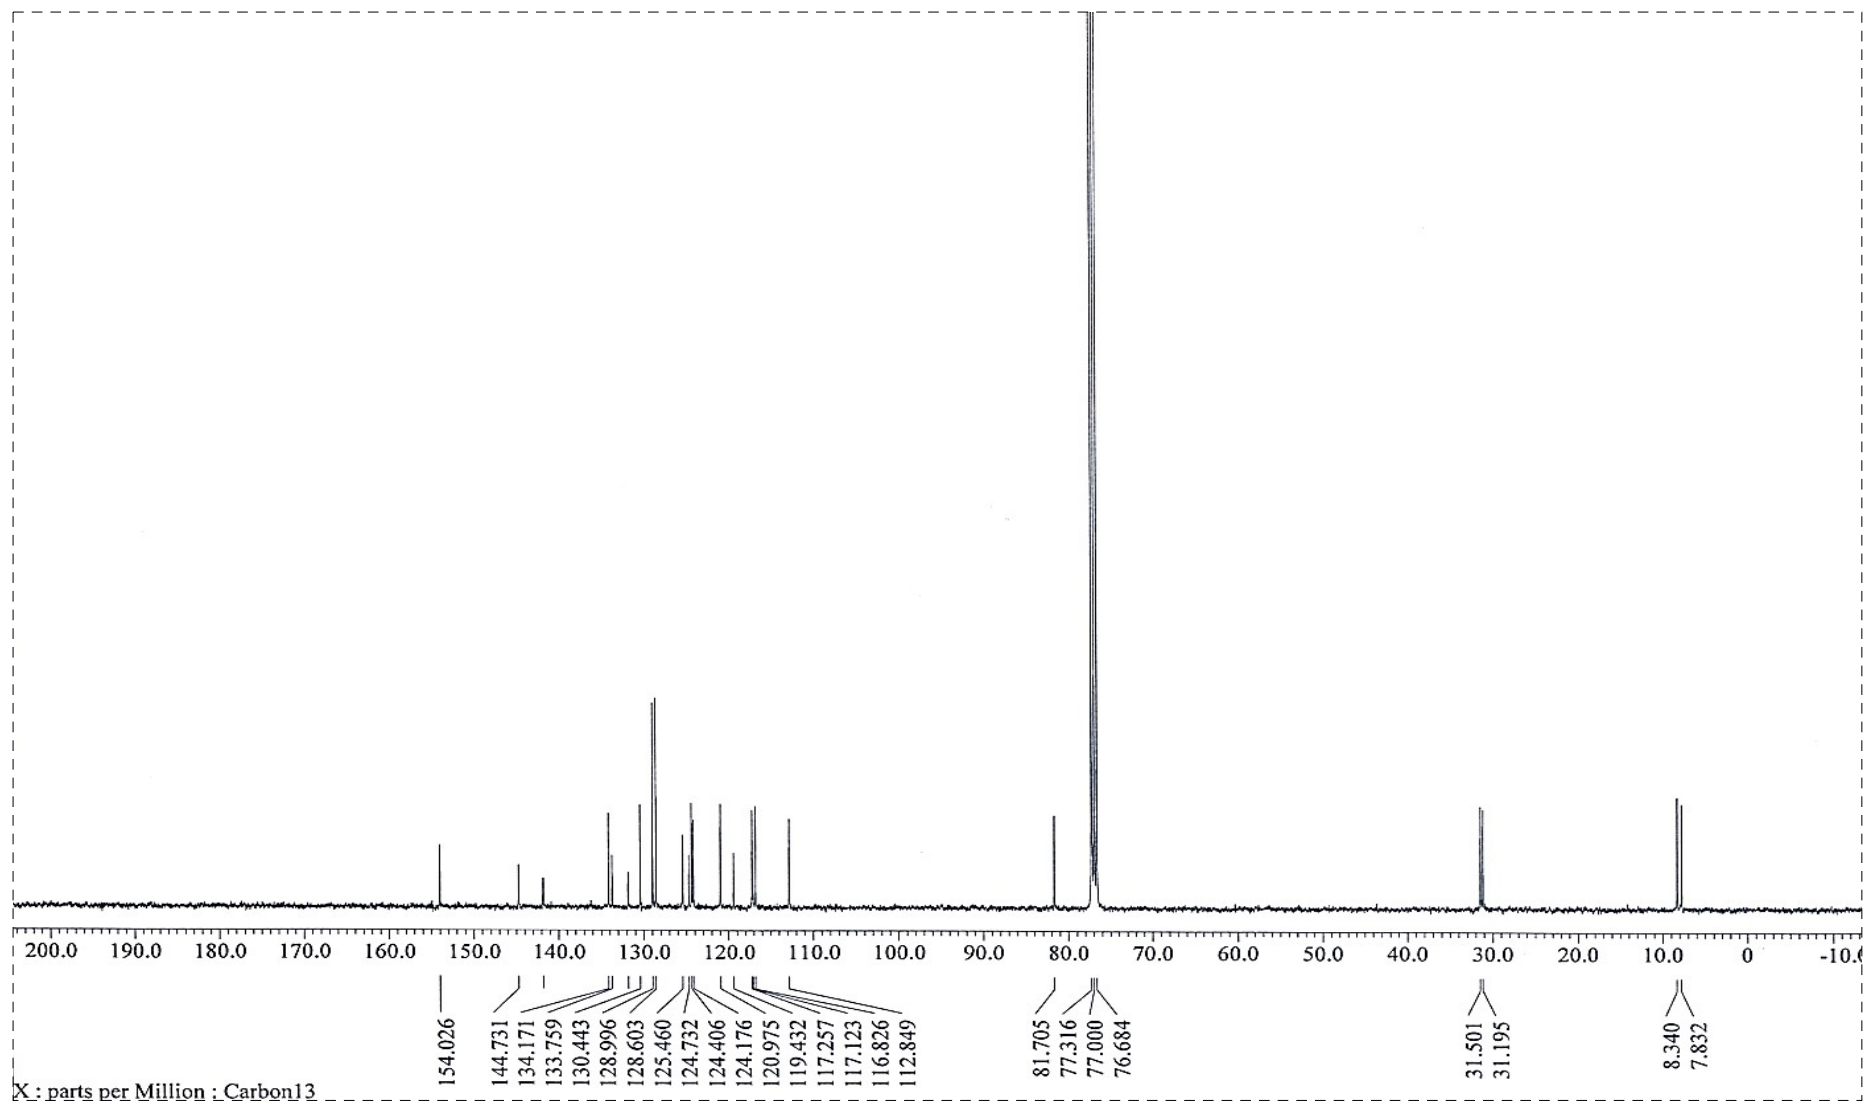

**Fig S38:**  $^{13}\text{C}$  NMR of 2-(4-Chlorophenyl)-3-(2,2-diethyl-2H-Chromen-4-yl)-imidazo[1,2-a]pyridine (**16m**)

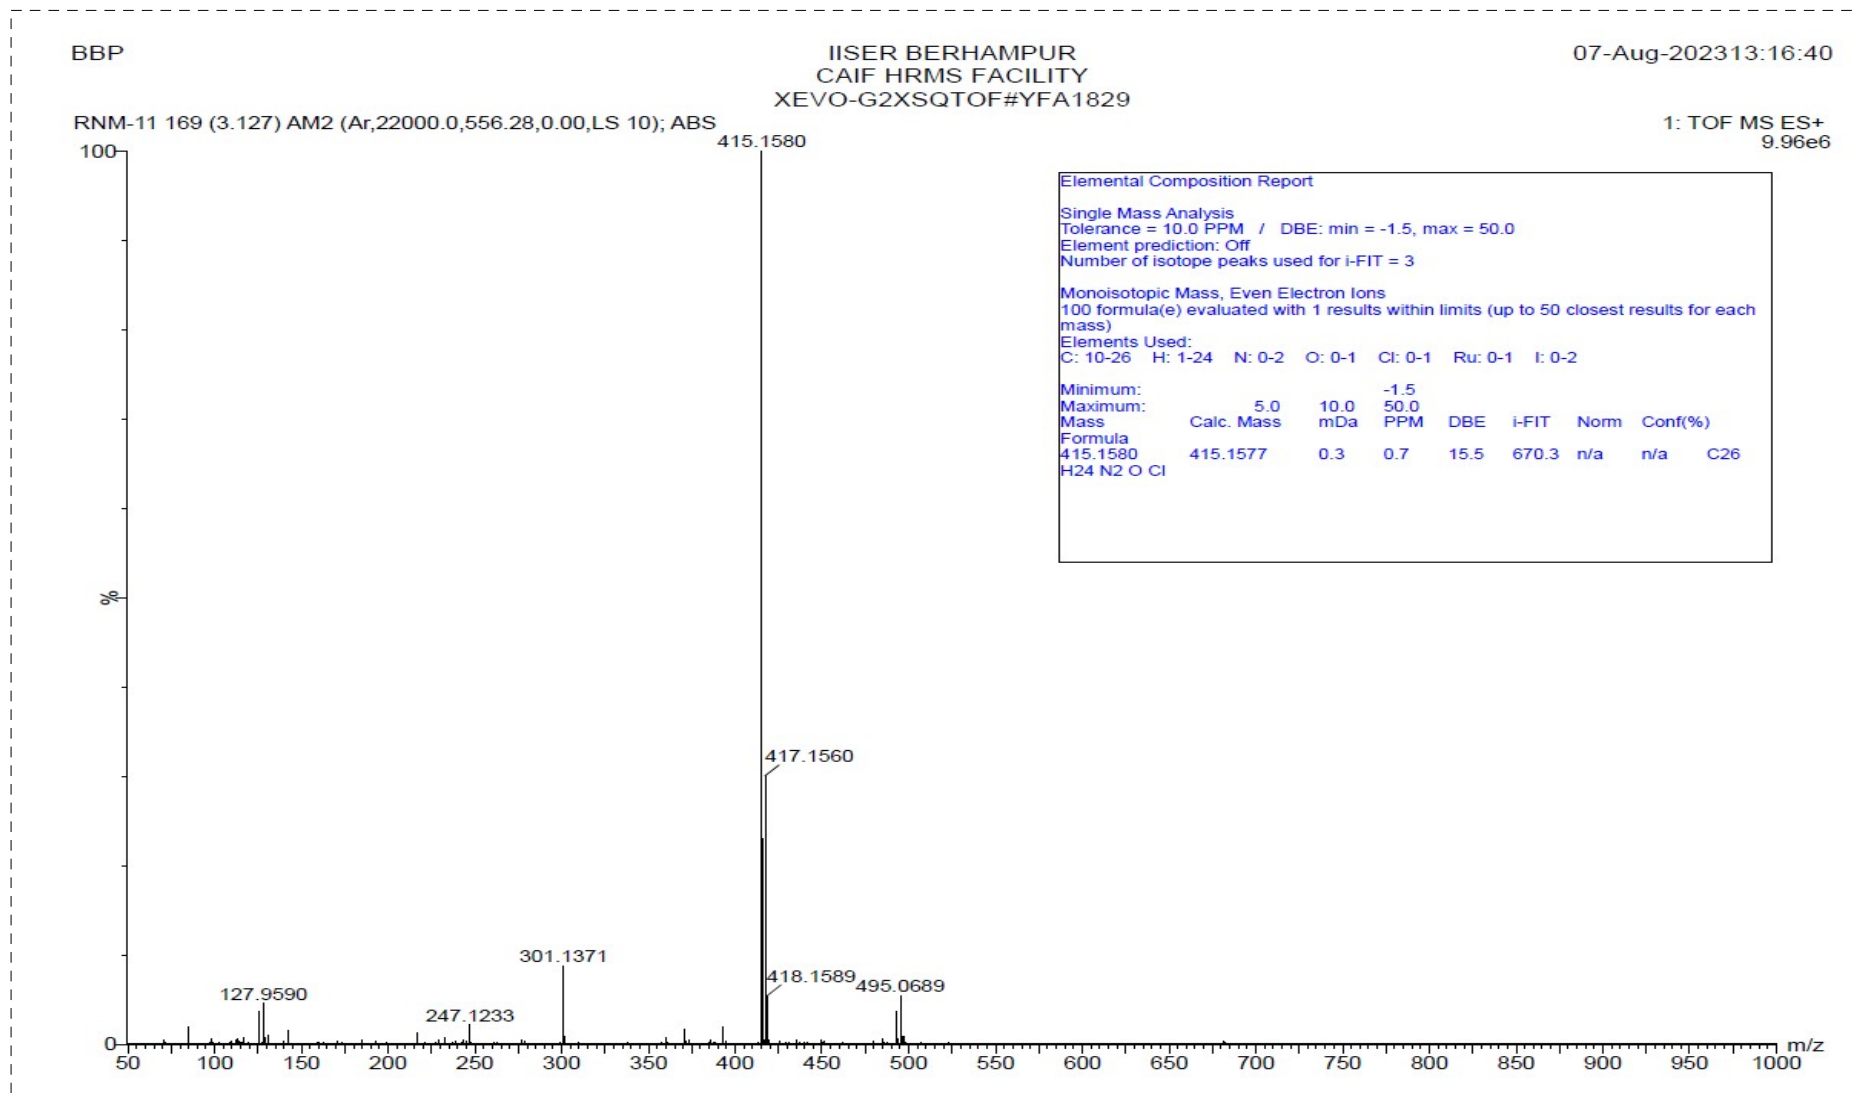

**Fig S39:** HR-MS of 2-(4-Chlorophenyl)-3-(2,2-diethyl-2H-Chromen-4-yl)-imidazo[1,2-a]pyridine (**16m**)



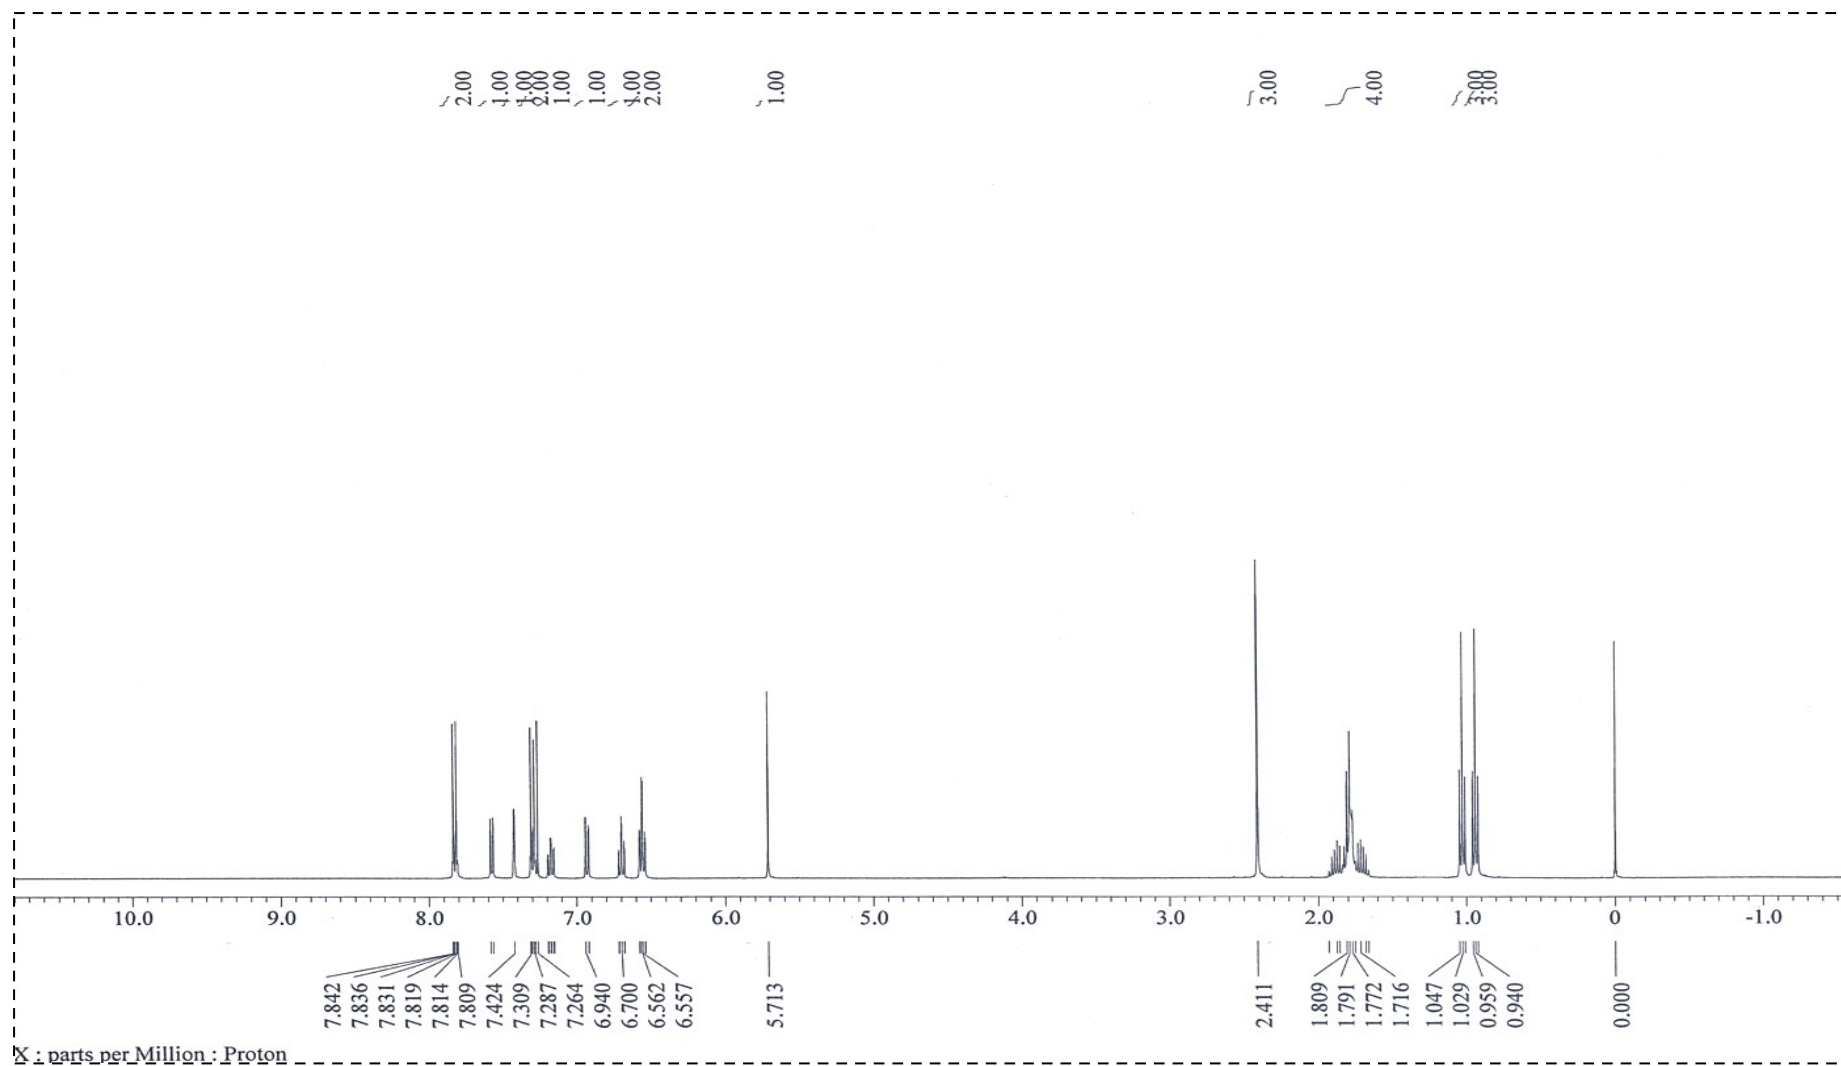

**Fig S40:**  $^1\text{H}$  NMR of 2-(4-chlorophenyl)-3-(2,2-diethyl-2H-chromen-4-yl)-7-methylimidazo[1,2-a]pyridine (**16n**)

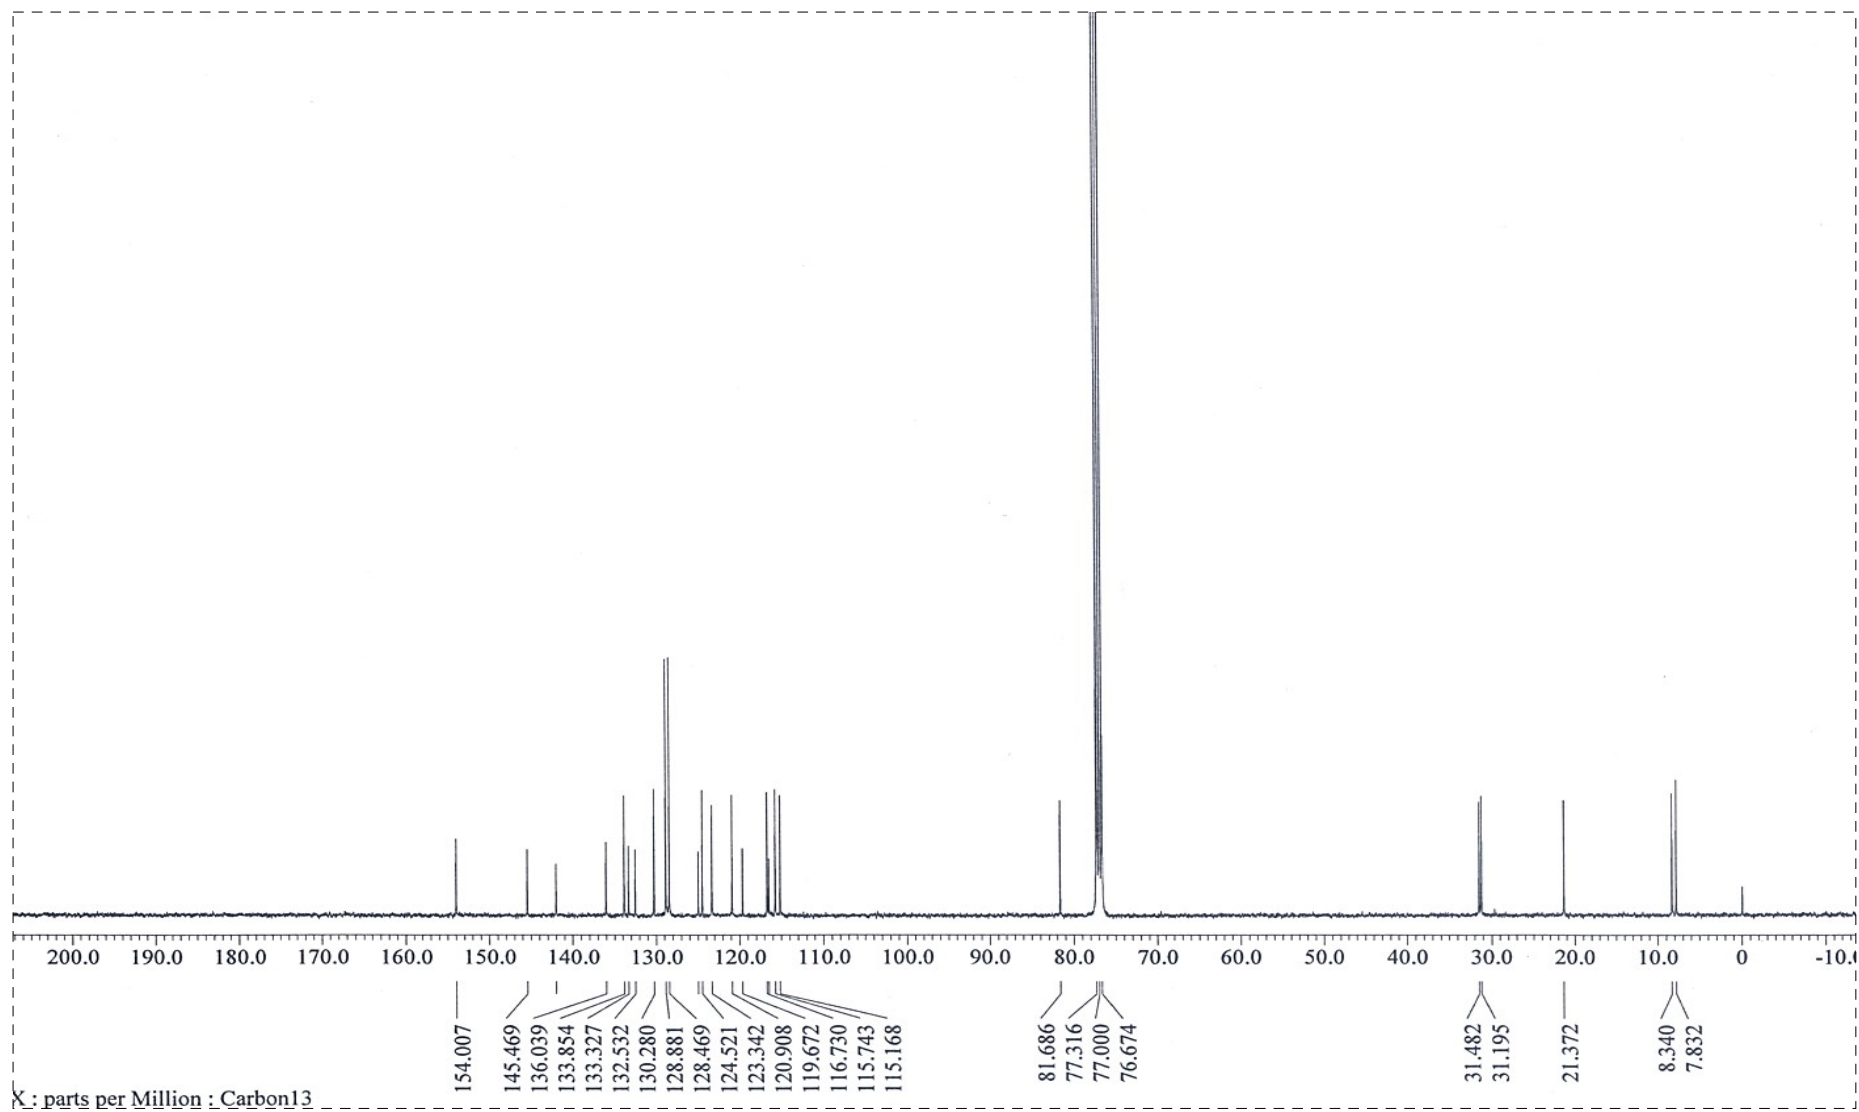

**Fig S41:**  $^{13}\text{C}$  NMR of 2-(4-chlorophenyl)-3-(2,2-diethyl-2H-chromen-4-yl)-7-methylimidazo[1,2-a]pyridine (**16n**)

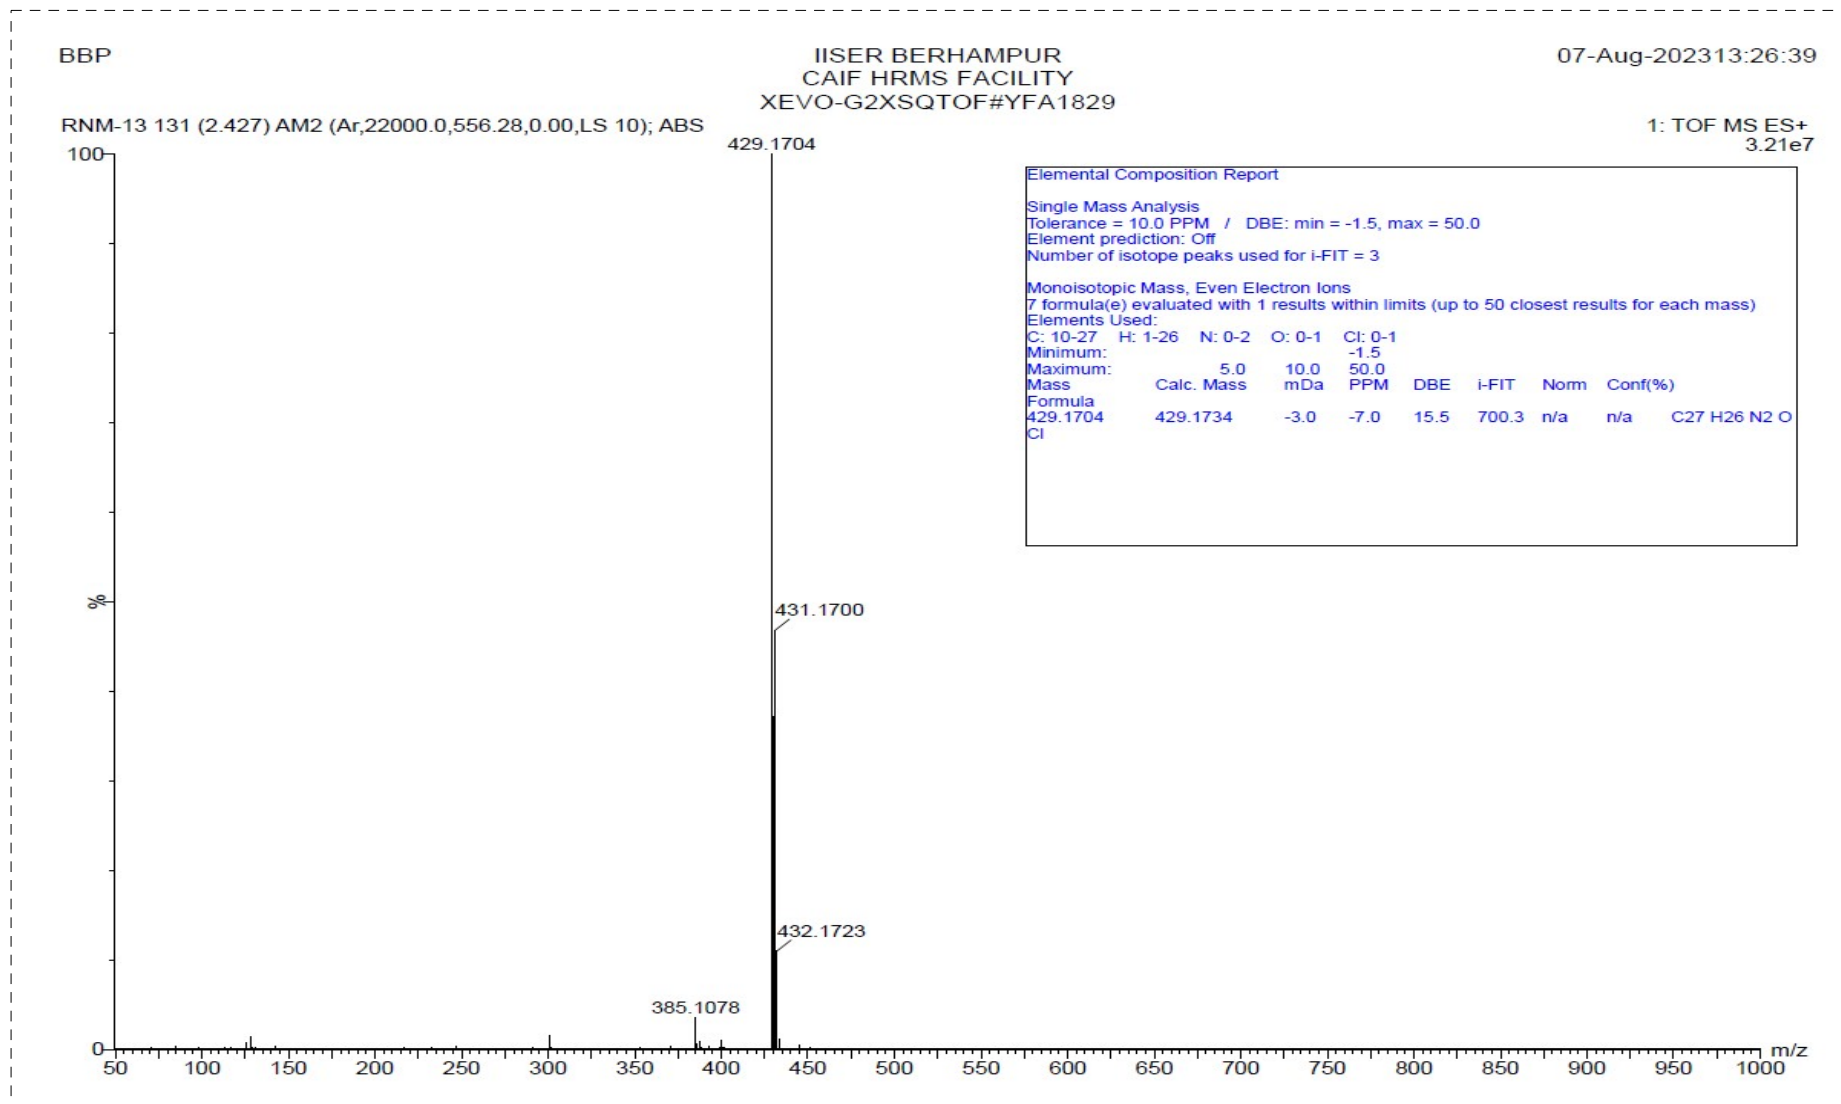

**Fig S42:** HRMS of 2-(4-chlorophenyl)-3-(2,2-diethyl-2H-chromen-4-yl)-7-methylimidazo[1,2-a]pyridine (**16n**)

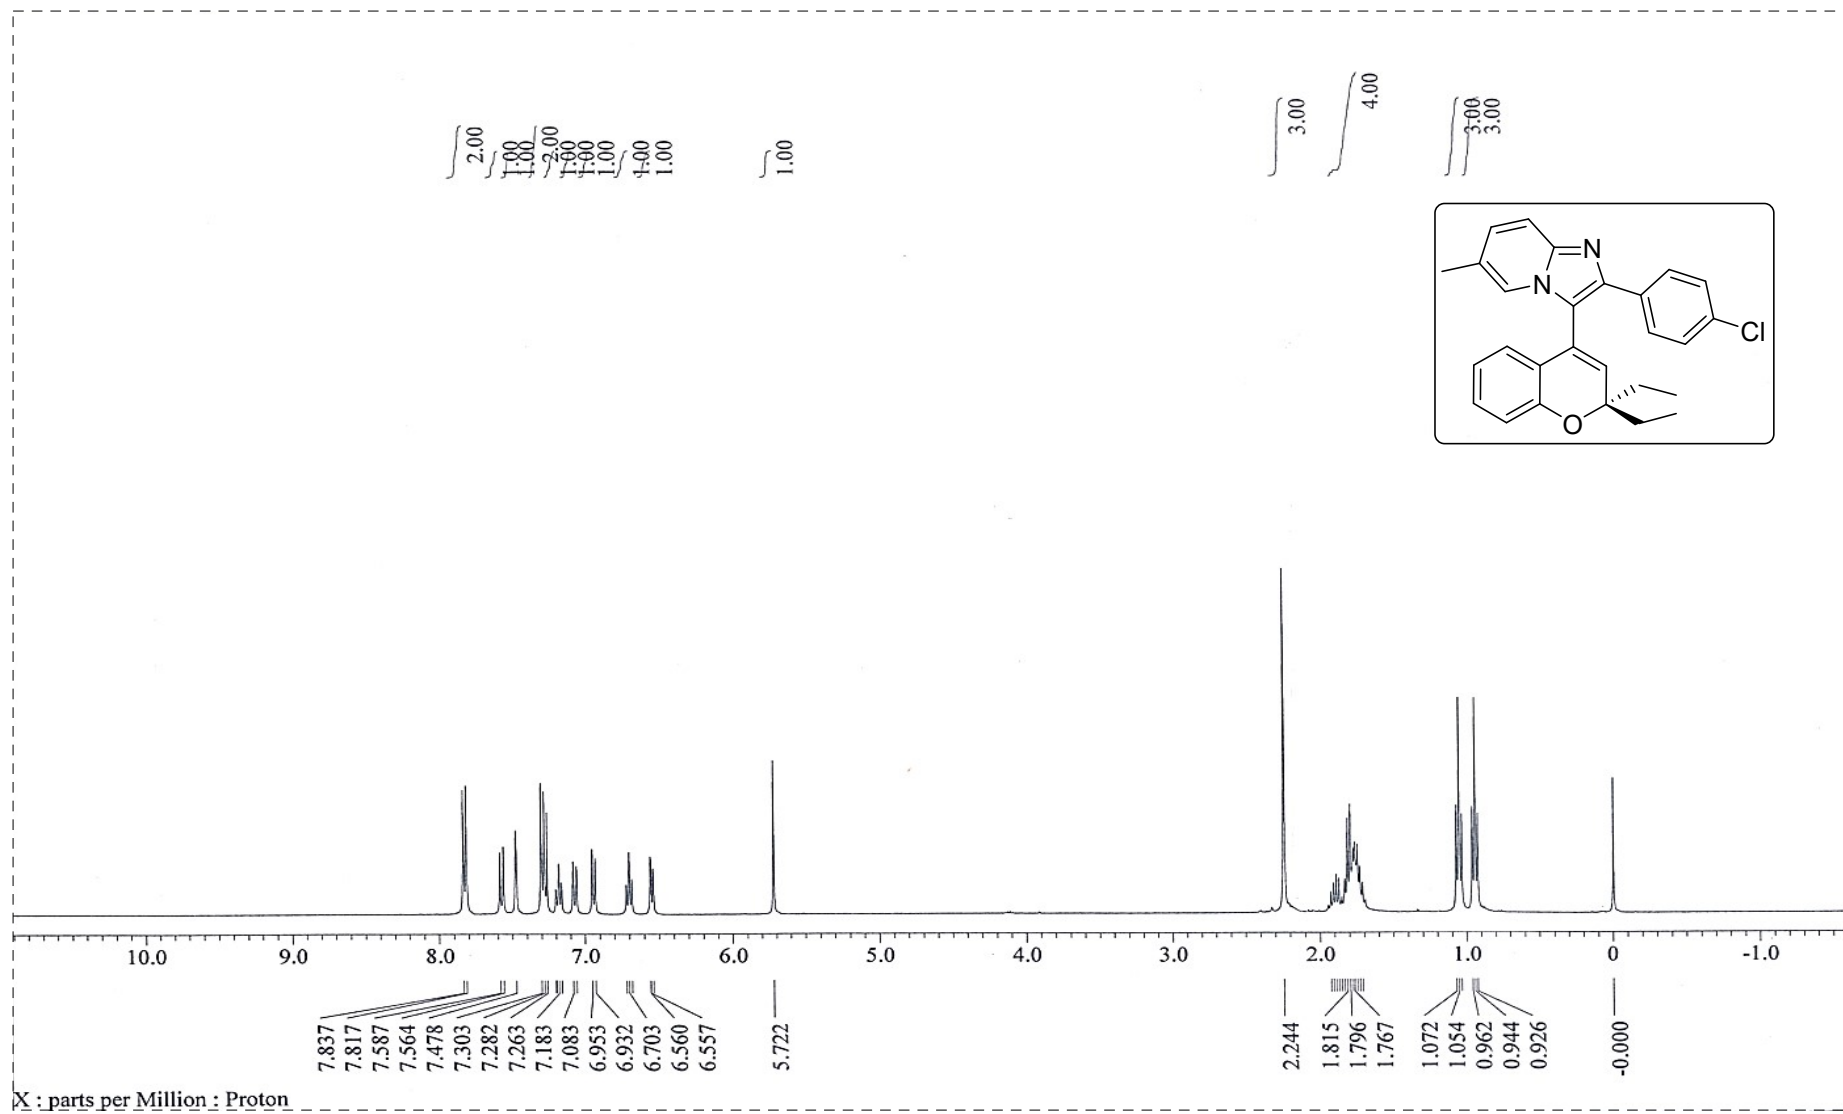

**Fig S43:**  $^1\text{H}$  NMR of 2-(4-chlorophenyl)-3-(2,2-diethyl-2H-chromen-4-yl)-6-methylimidazo[1,2-a]pyridine (**160**)

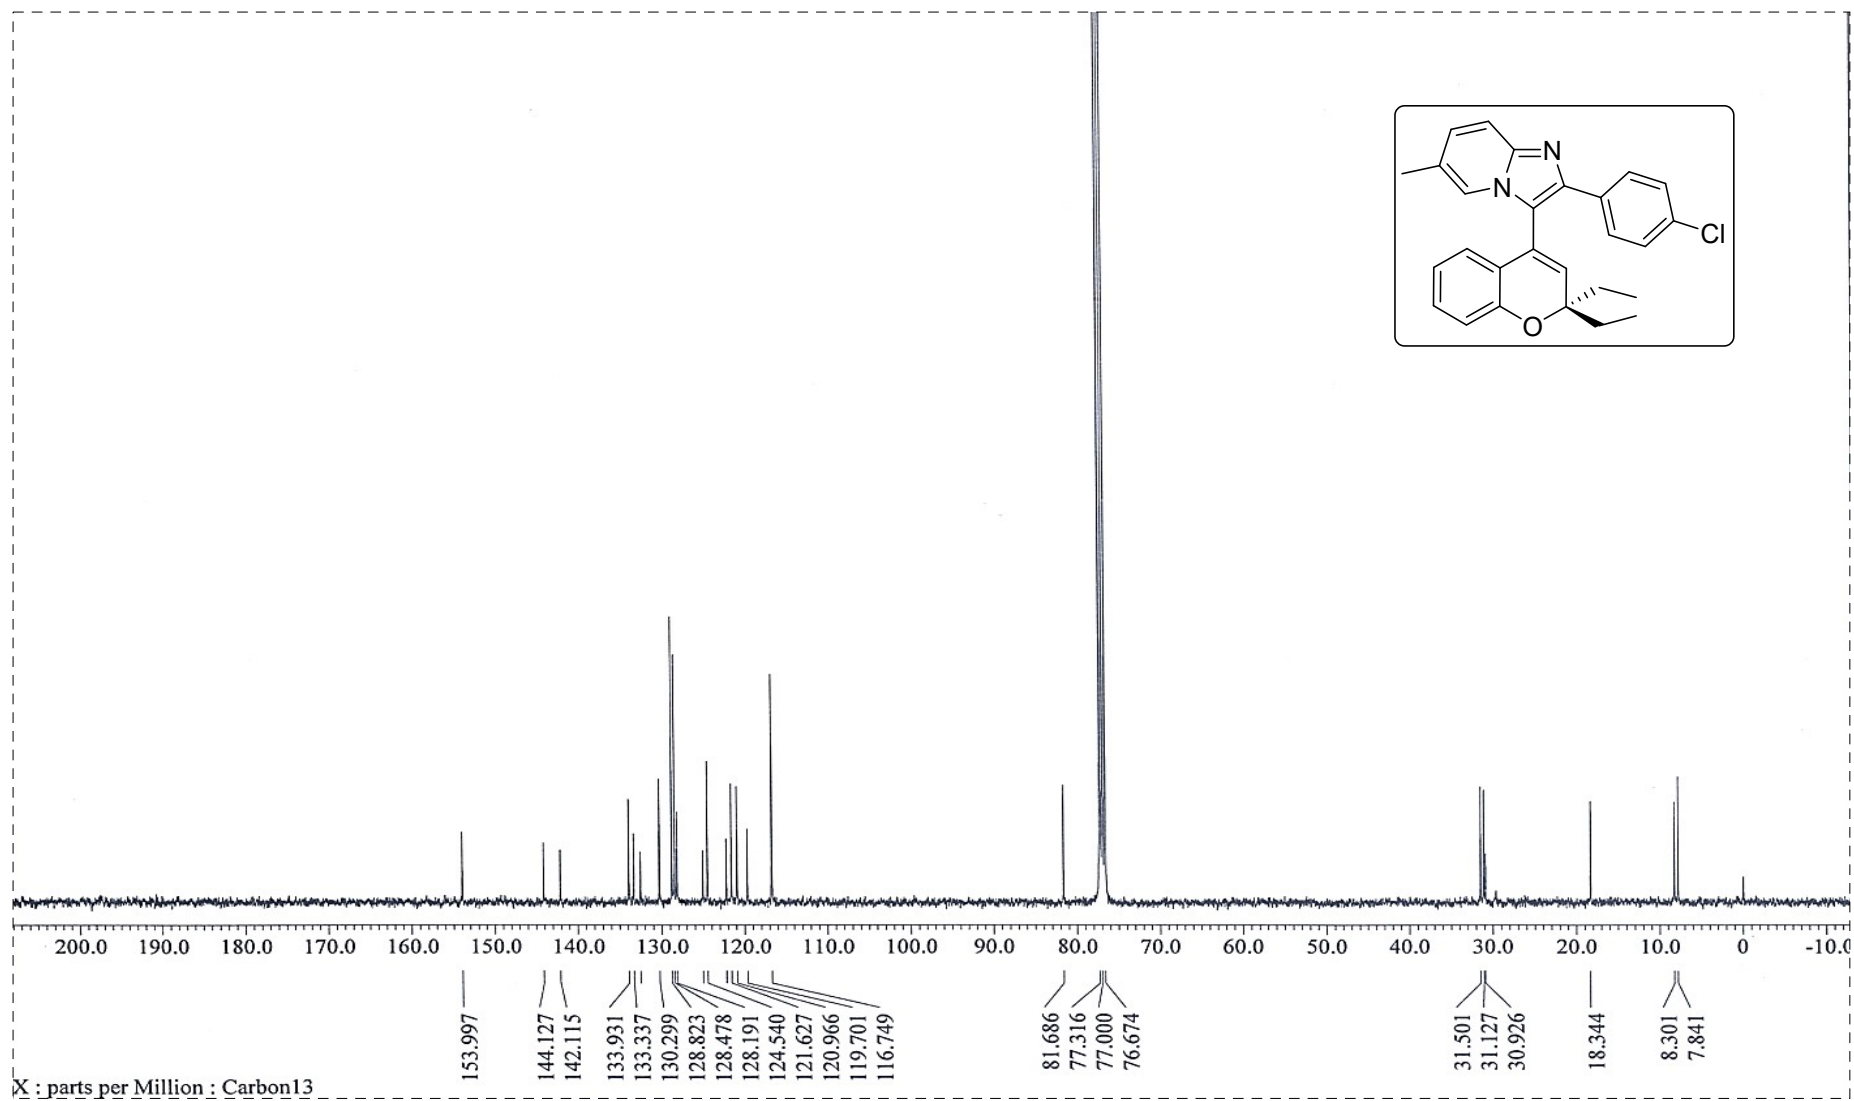

**Fig S44:**  $^{13}\text{C}$  NMR of 2-(4-chlorophenyl)-3-(2,2-diethyl-2H-chromen-4-yl)-6-methylimidazo[1,2-a]pyridine (**160**)

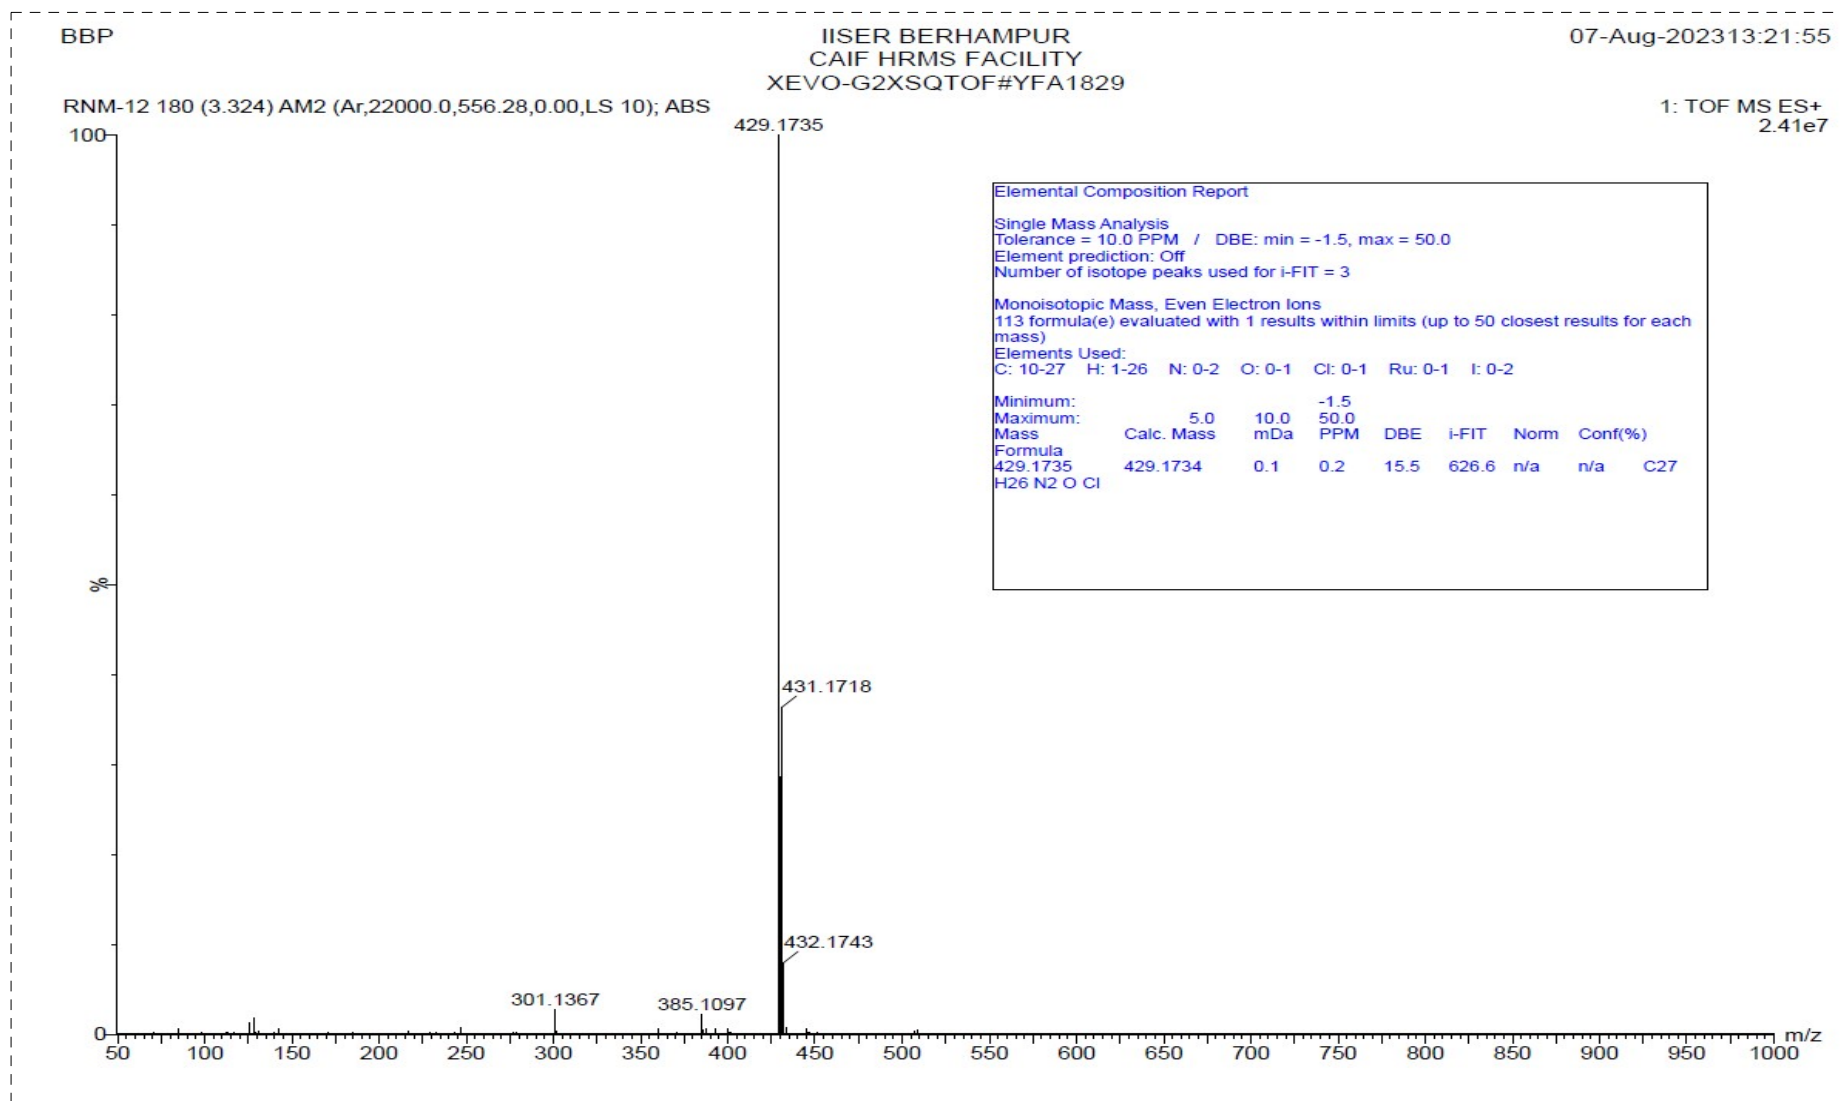

**Fig S45:** HR-MS of 2-(4-chlorophenyl)-3-(2,2-diethyl-2H-chromen-4-yl)-6-methylimidazo[1,2-a]pyridine (**16o**)

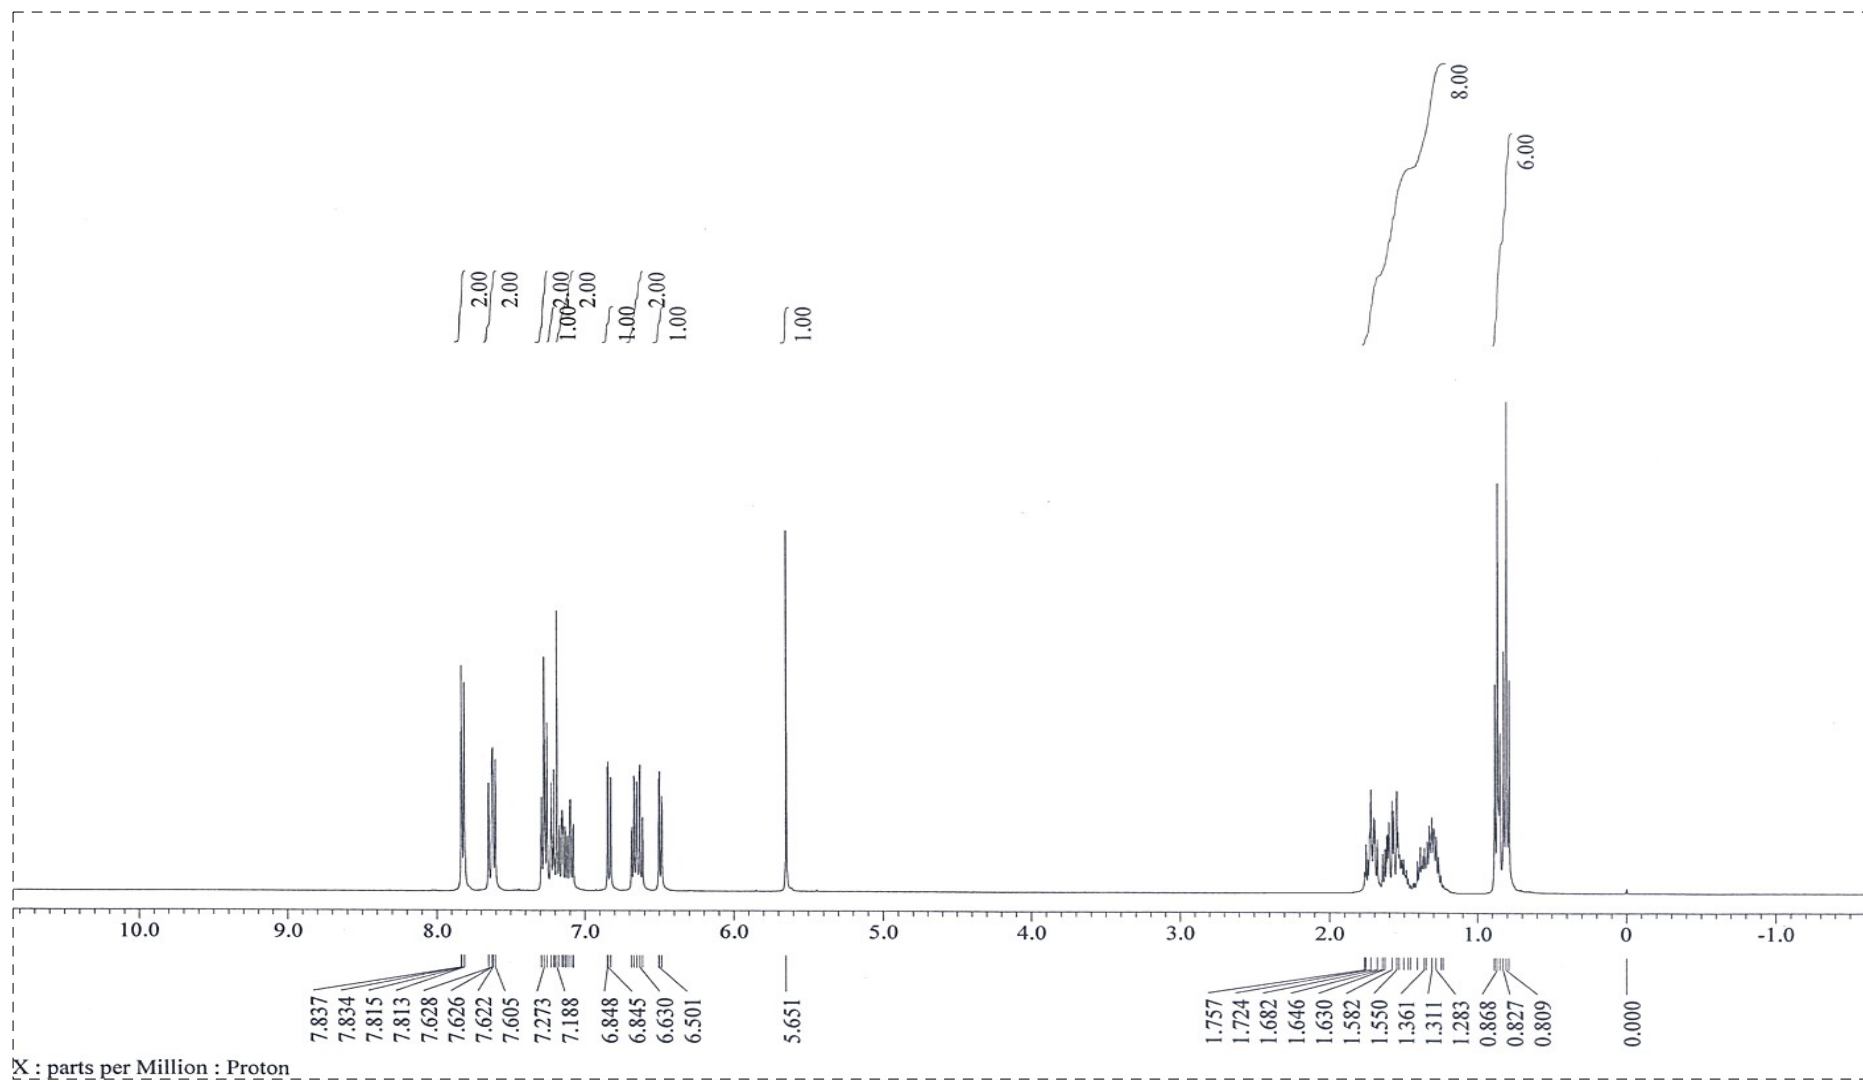

**Fig S46:**  $^1\text{H}$  NMR of 3-(2, 2-dipropyl-2H-chromen-4-yl)-2-phenylimidazo-[1,2-a]pyridine (**16p**)

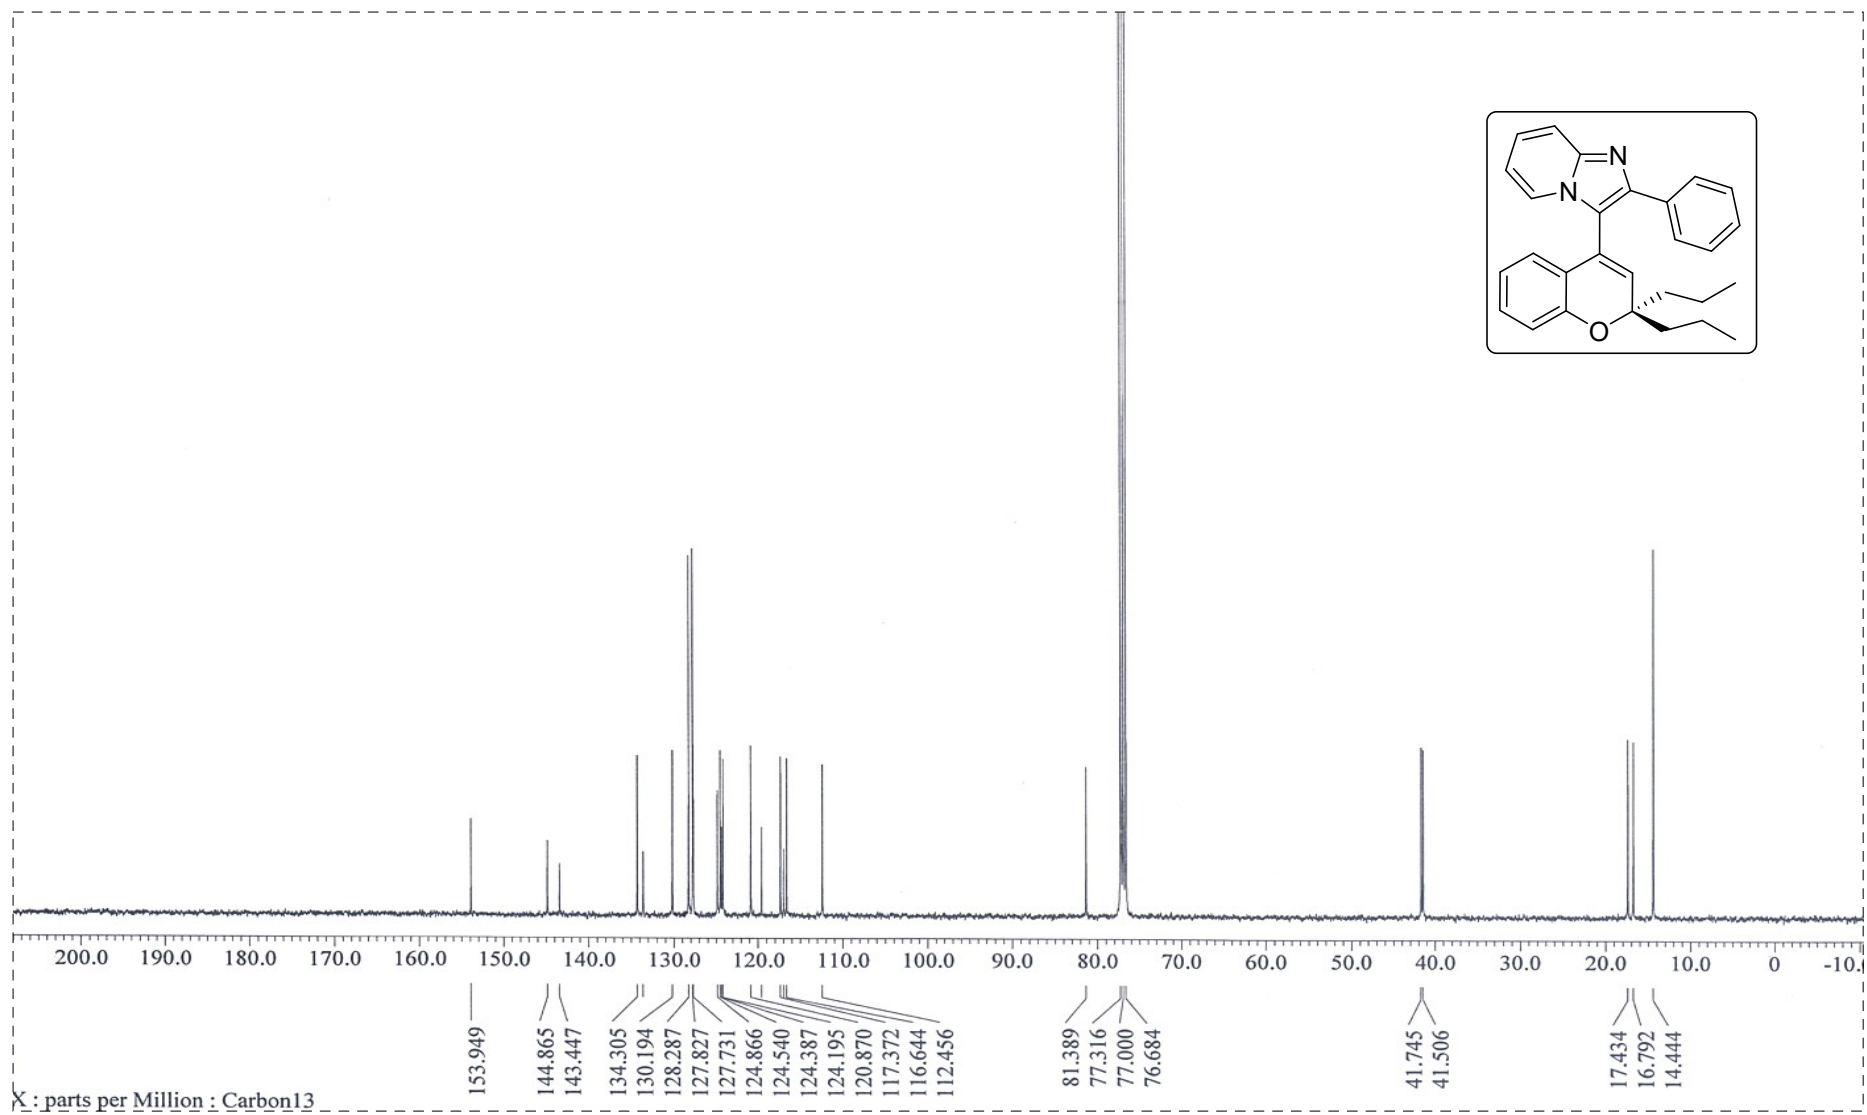

**Fig S47:** <sup>13</sup>C NMR of 3-(2, 2-dipropyl-2H-chromen-4-yl)-2-phenylimidazo-[1,2-a]pyridine (**16p**)



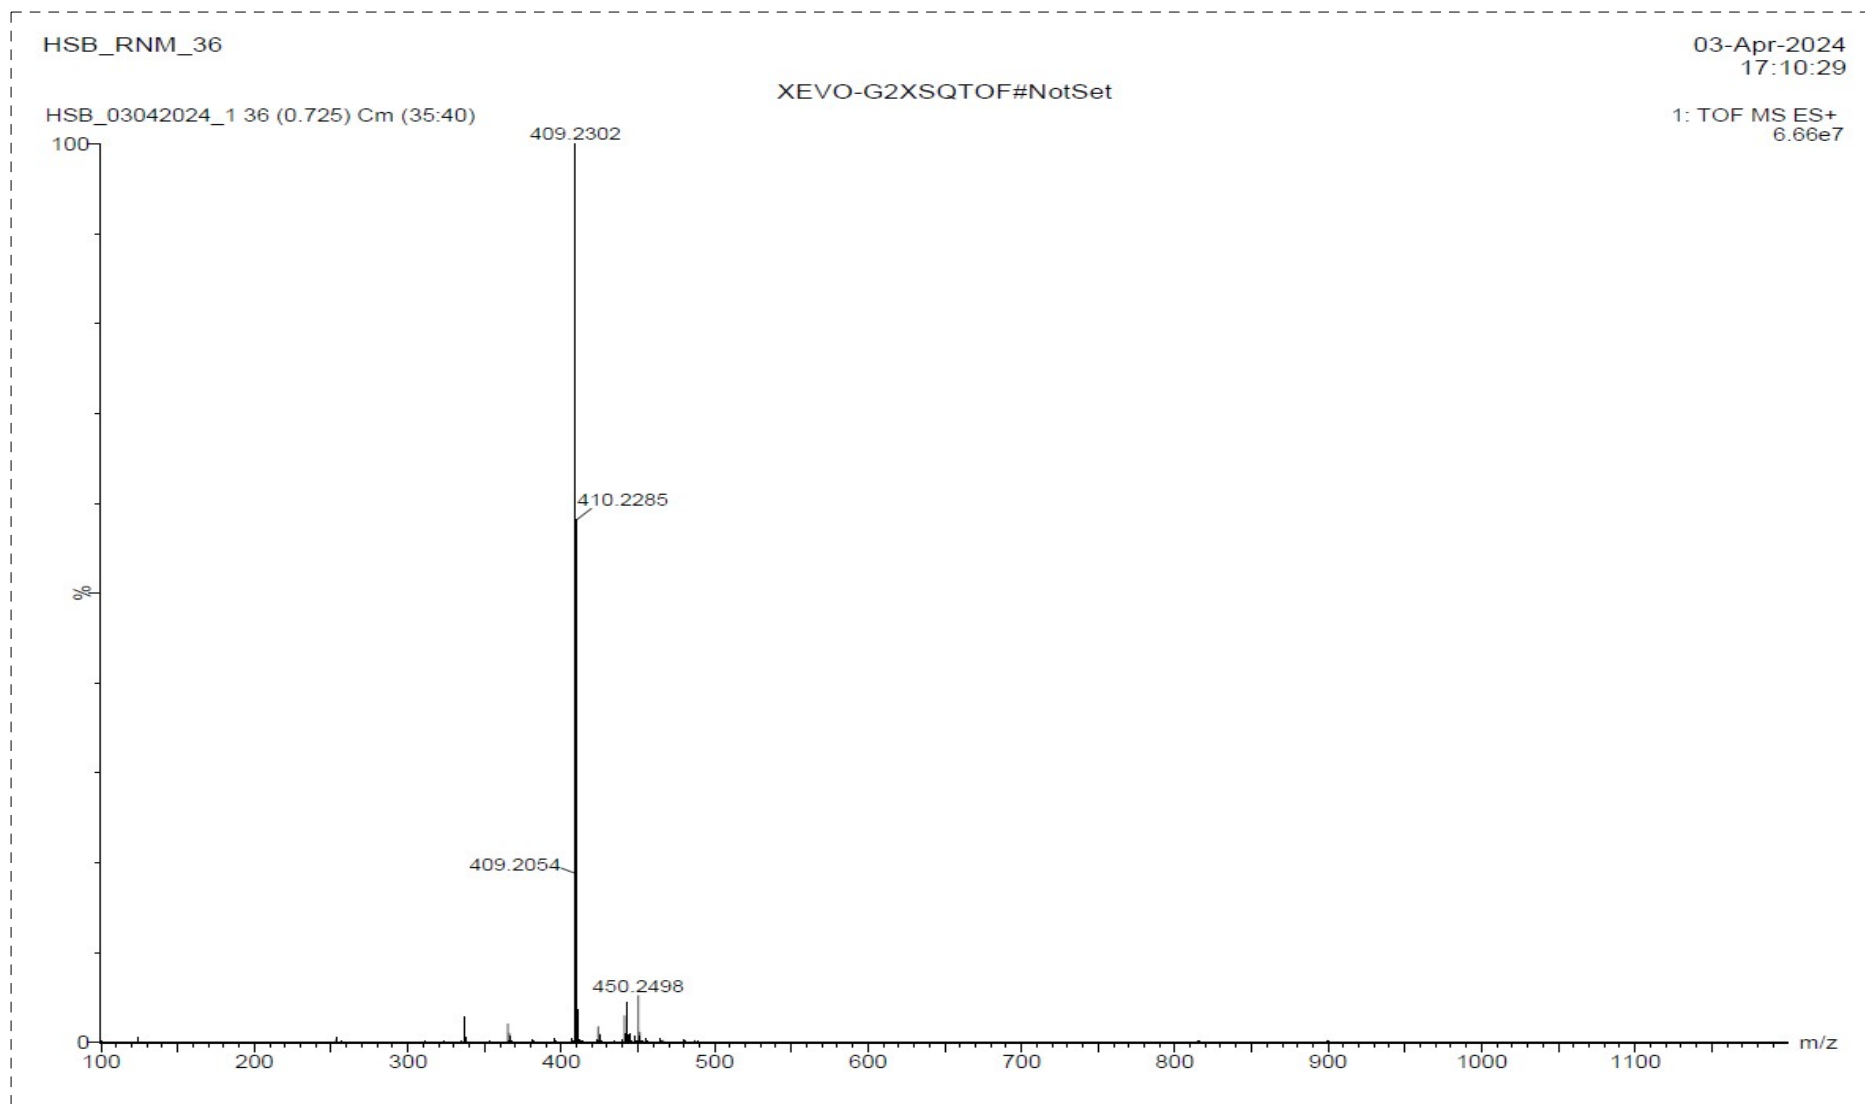

**Fig S48:** HR-MS of 3-(2, 2-dipropyl-2H-chromen-4-yl)-2-phenylimidazo-[1,2-a]pyridine (**16p**)

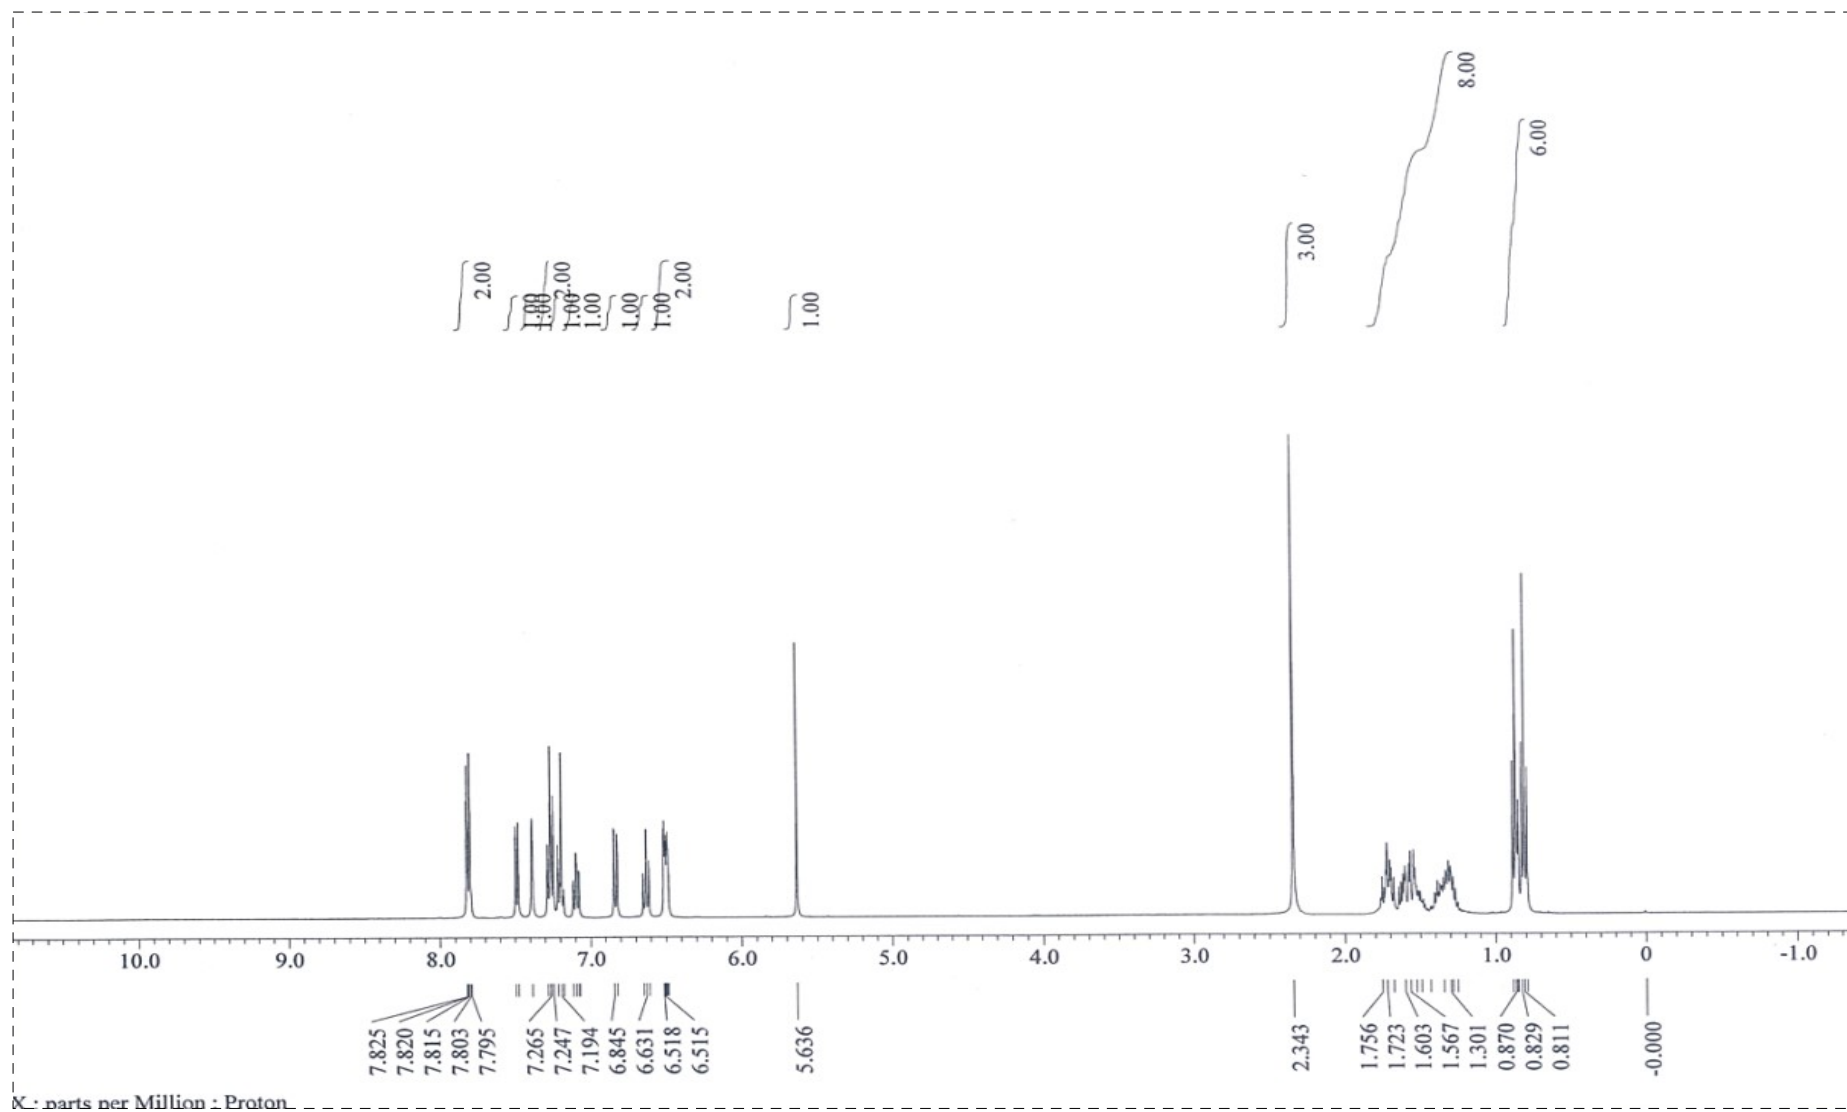

**Fig S49:**  $^1\text{H}$  NMR of 3-(2,2-dipropyl-2H-chromen-4-yl)-7-methyl-2-phenylimidazo[1,2-a]pyridine (**16q**)

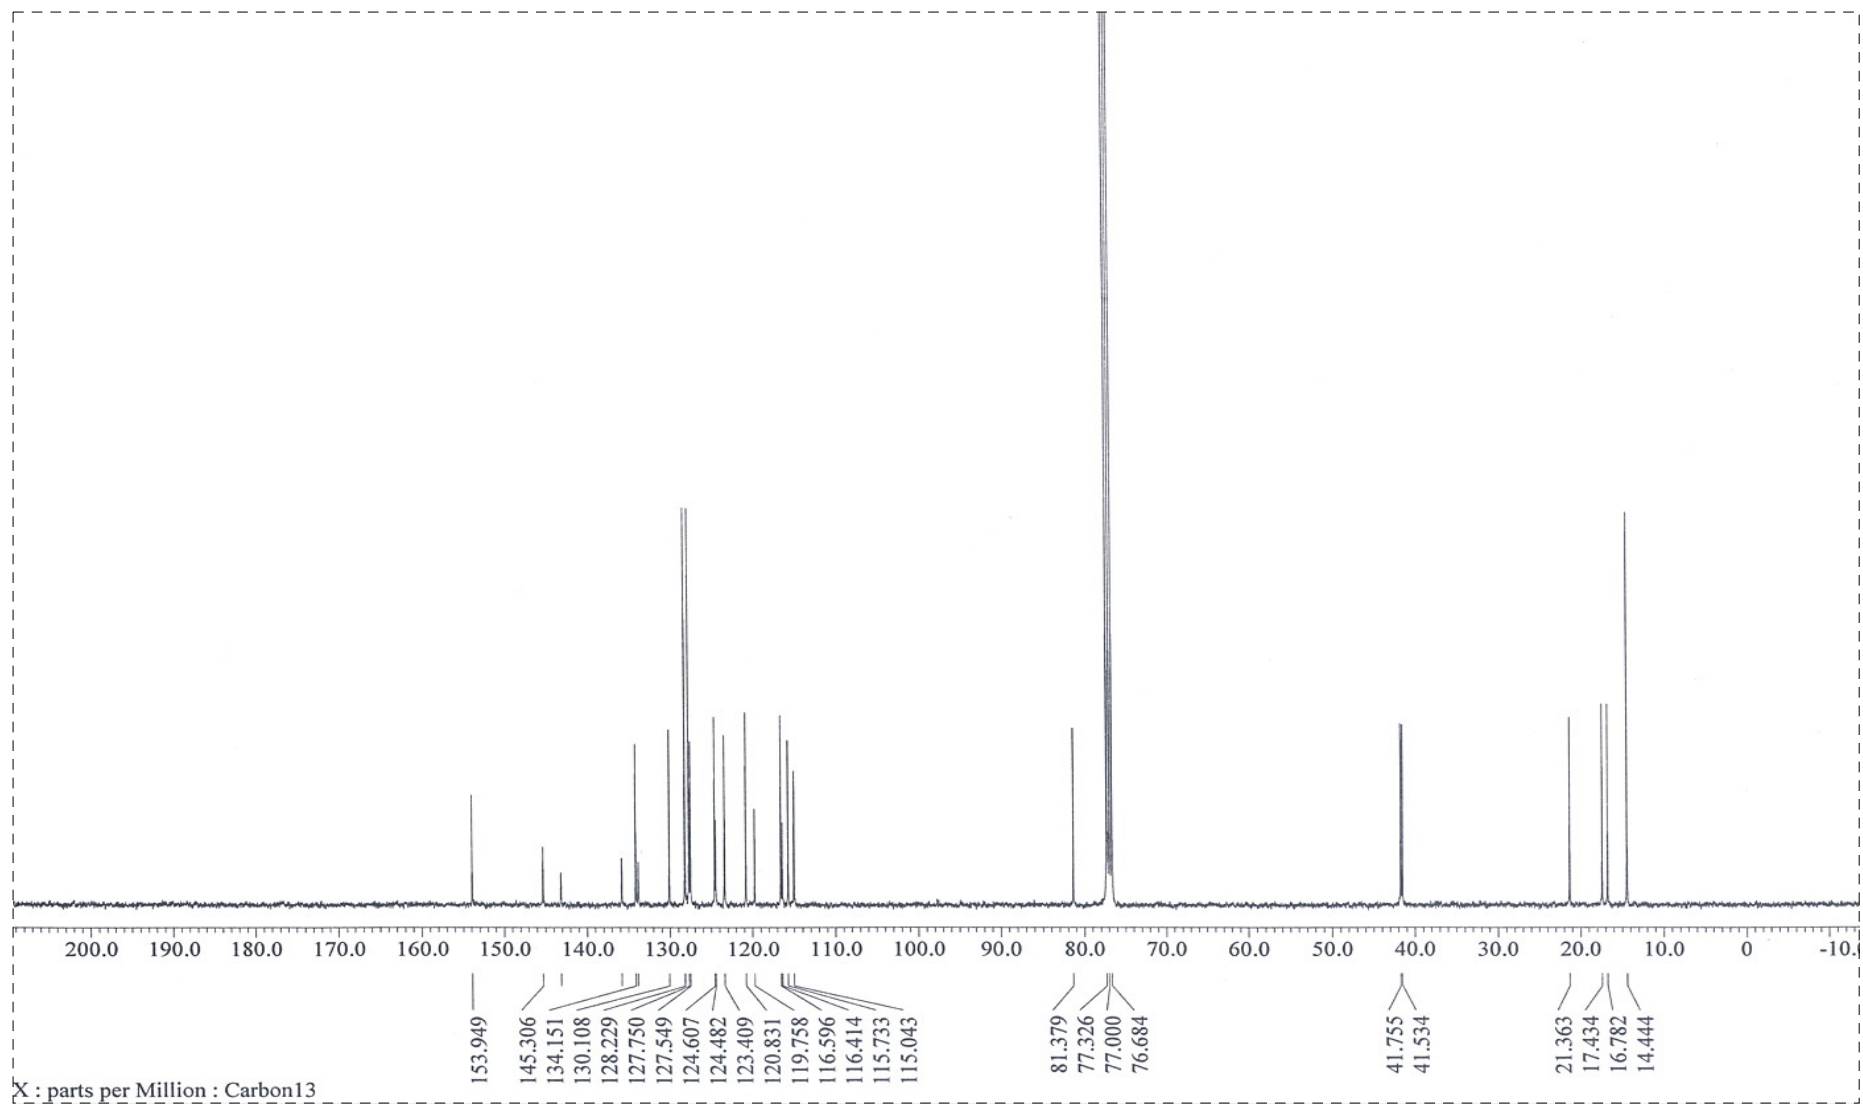

**Fig S50:**  $^{13}\text{C}$  NMR of 3-(2,2-dipropyl-2H-chromen-4-yl)-7-methyl-2-phenylimidazo[1,2-a]pyridine (**16q**)

HSB\_RNB\_38\_R

09-Apr-2024  
12:11:30

XEVO-G2XSQTOF#NotSet

HSB\_09042024\_2 (0.053) Cu (0.05); Is (1.00,1.00) C<sub>29</sub>H<sub>31</sub>N<sub>2</sub>O

1: TOF MS ES+  
7.22e12

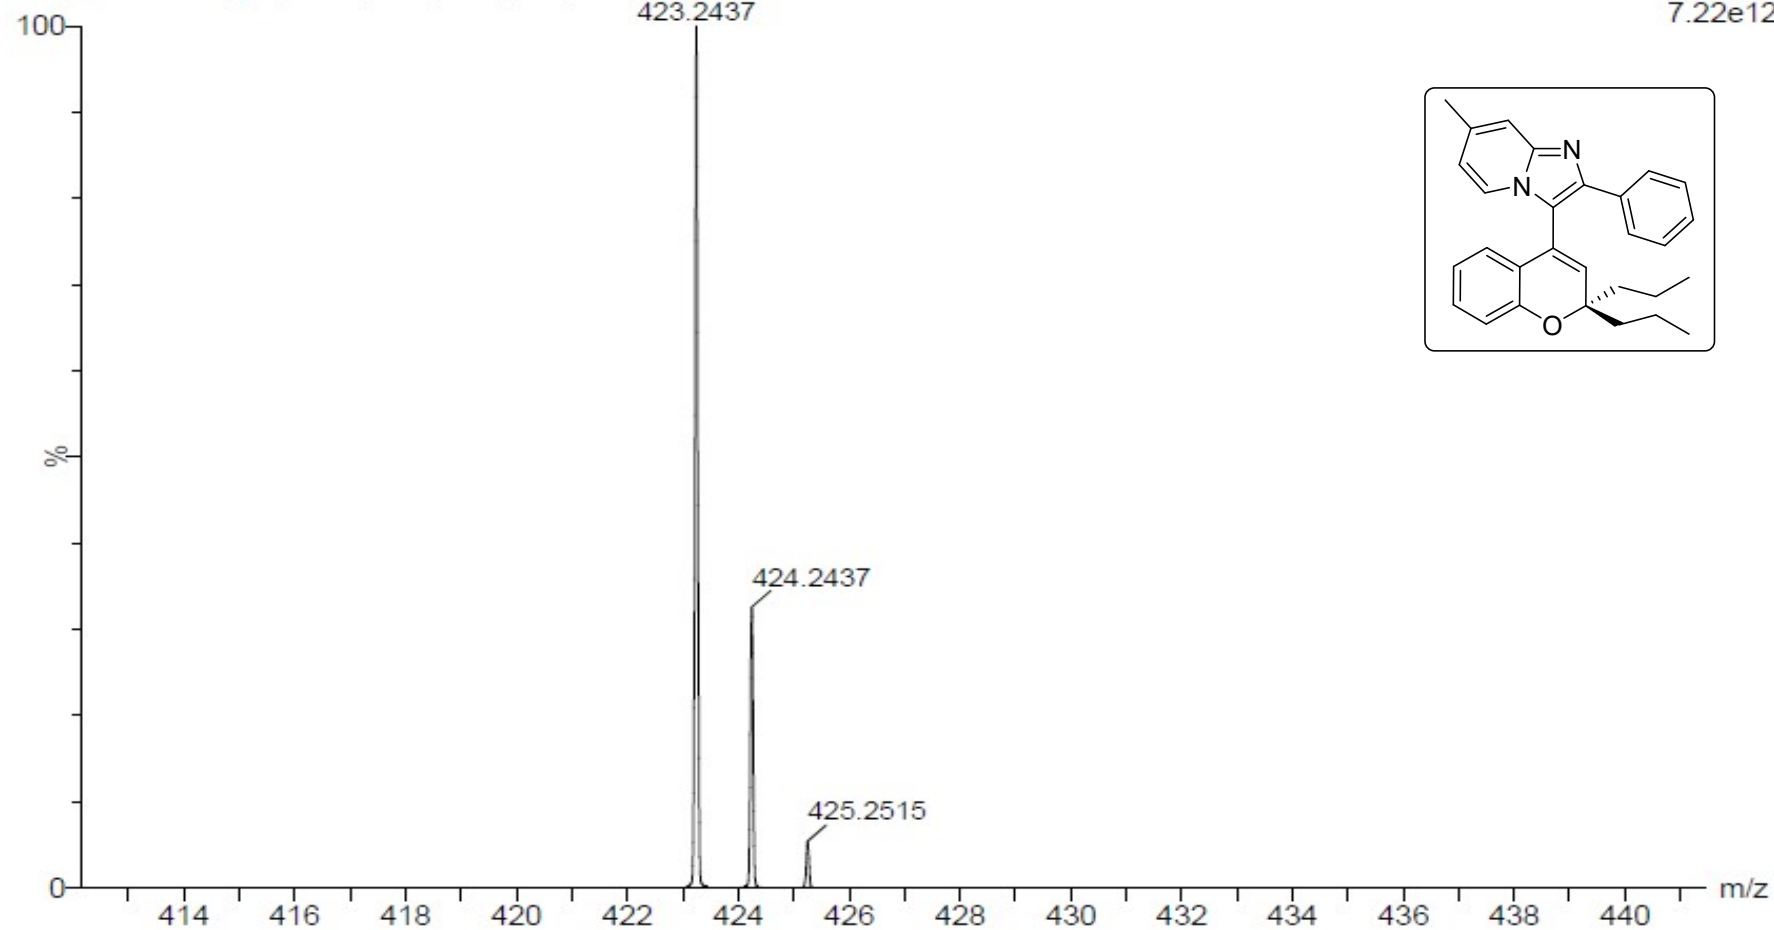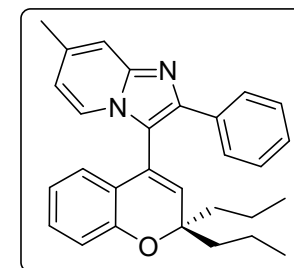

**Fig S51:** HR-MS of 3-(2,2-dipropyl-2H-chromen-4-yl)-7-methyl-2-phenylimidazo[1,2-a]pyridine (**16q**)

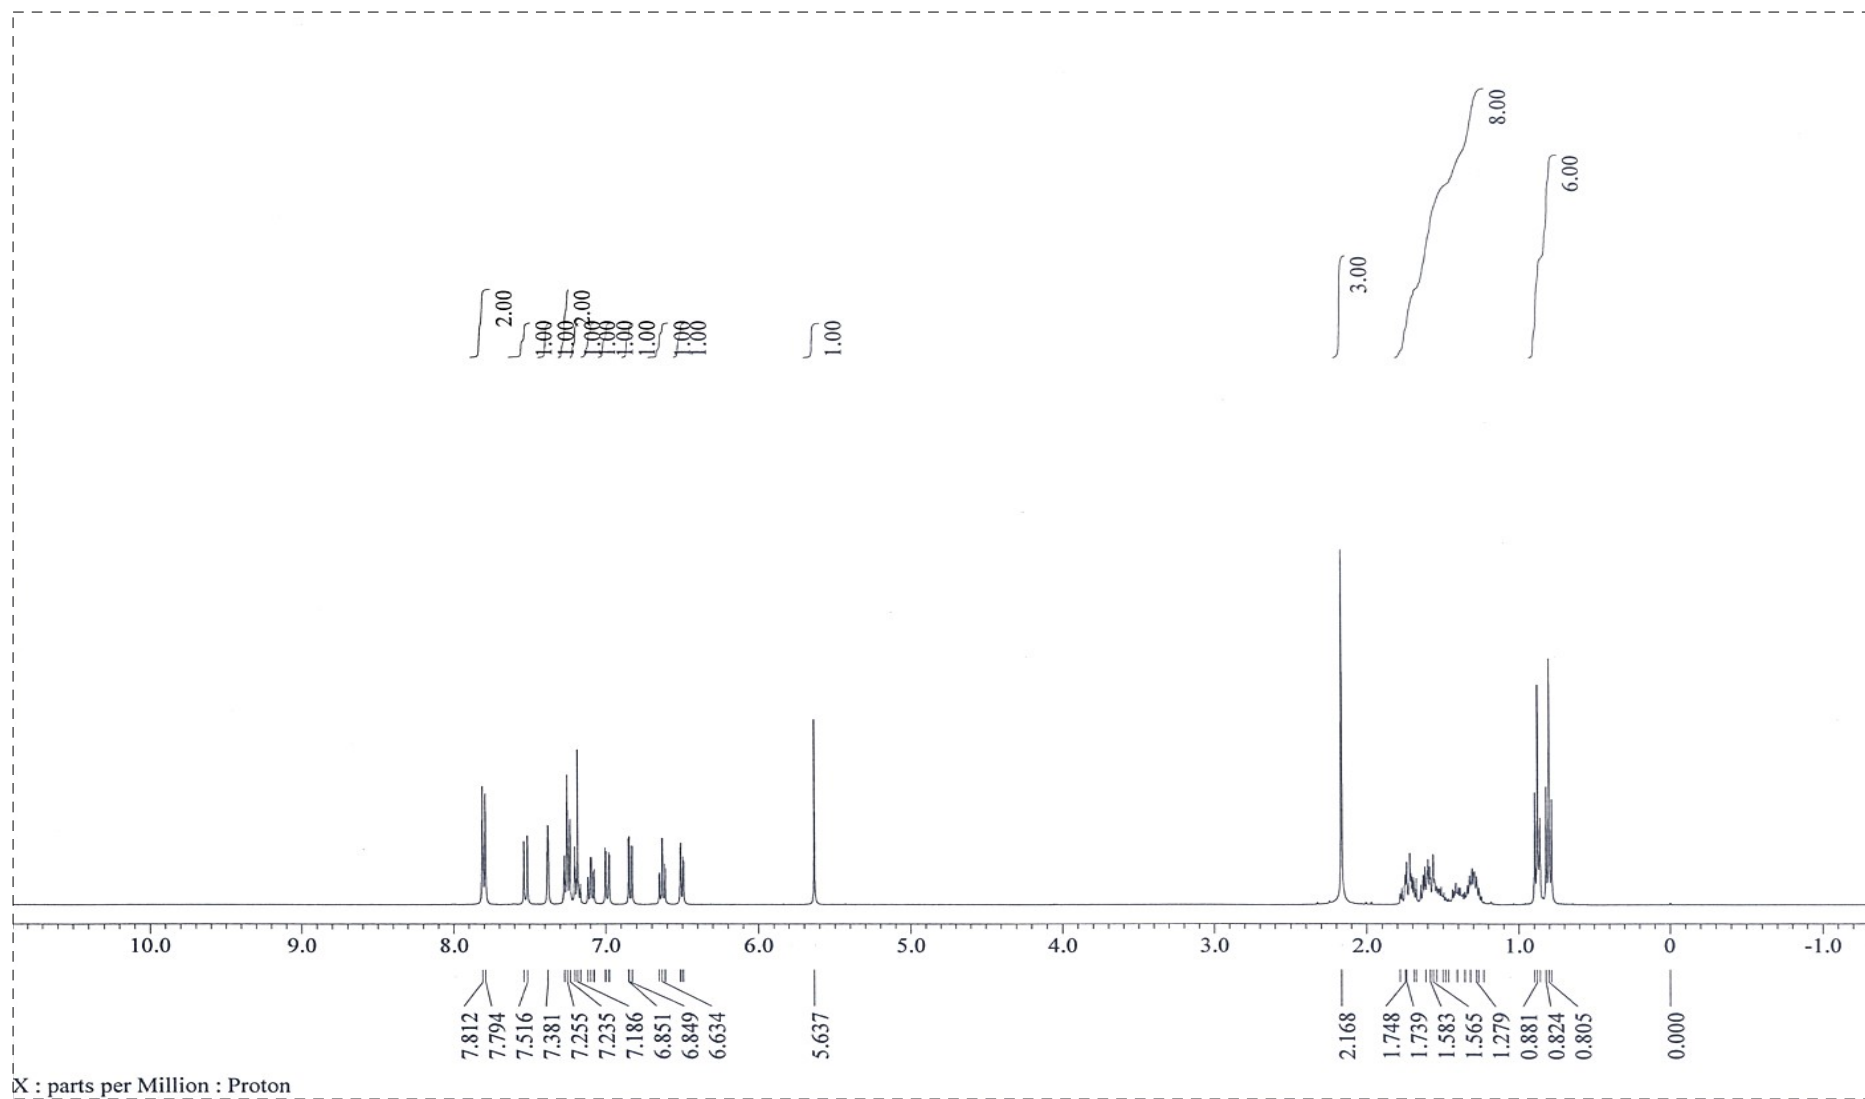

**Fig S52:**  $^1\text{H}$  NMR of 3-(2,2-dipropyl-2H-chromen-4-yl)-6-methyl-2-phenylimidazo-[1,2-a]pyridine (**16r**)

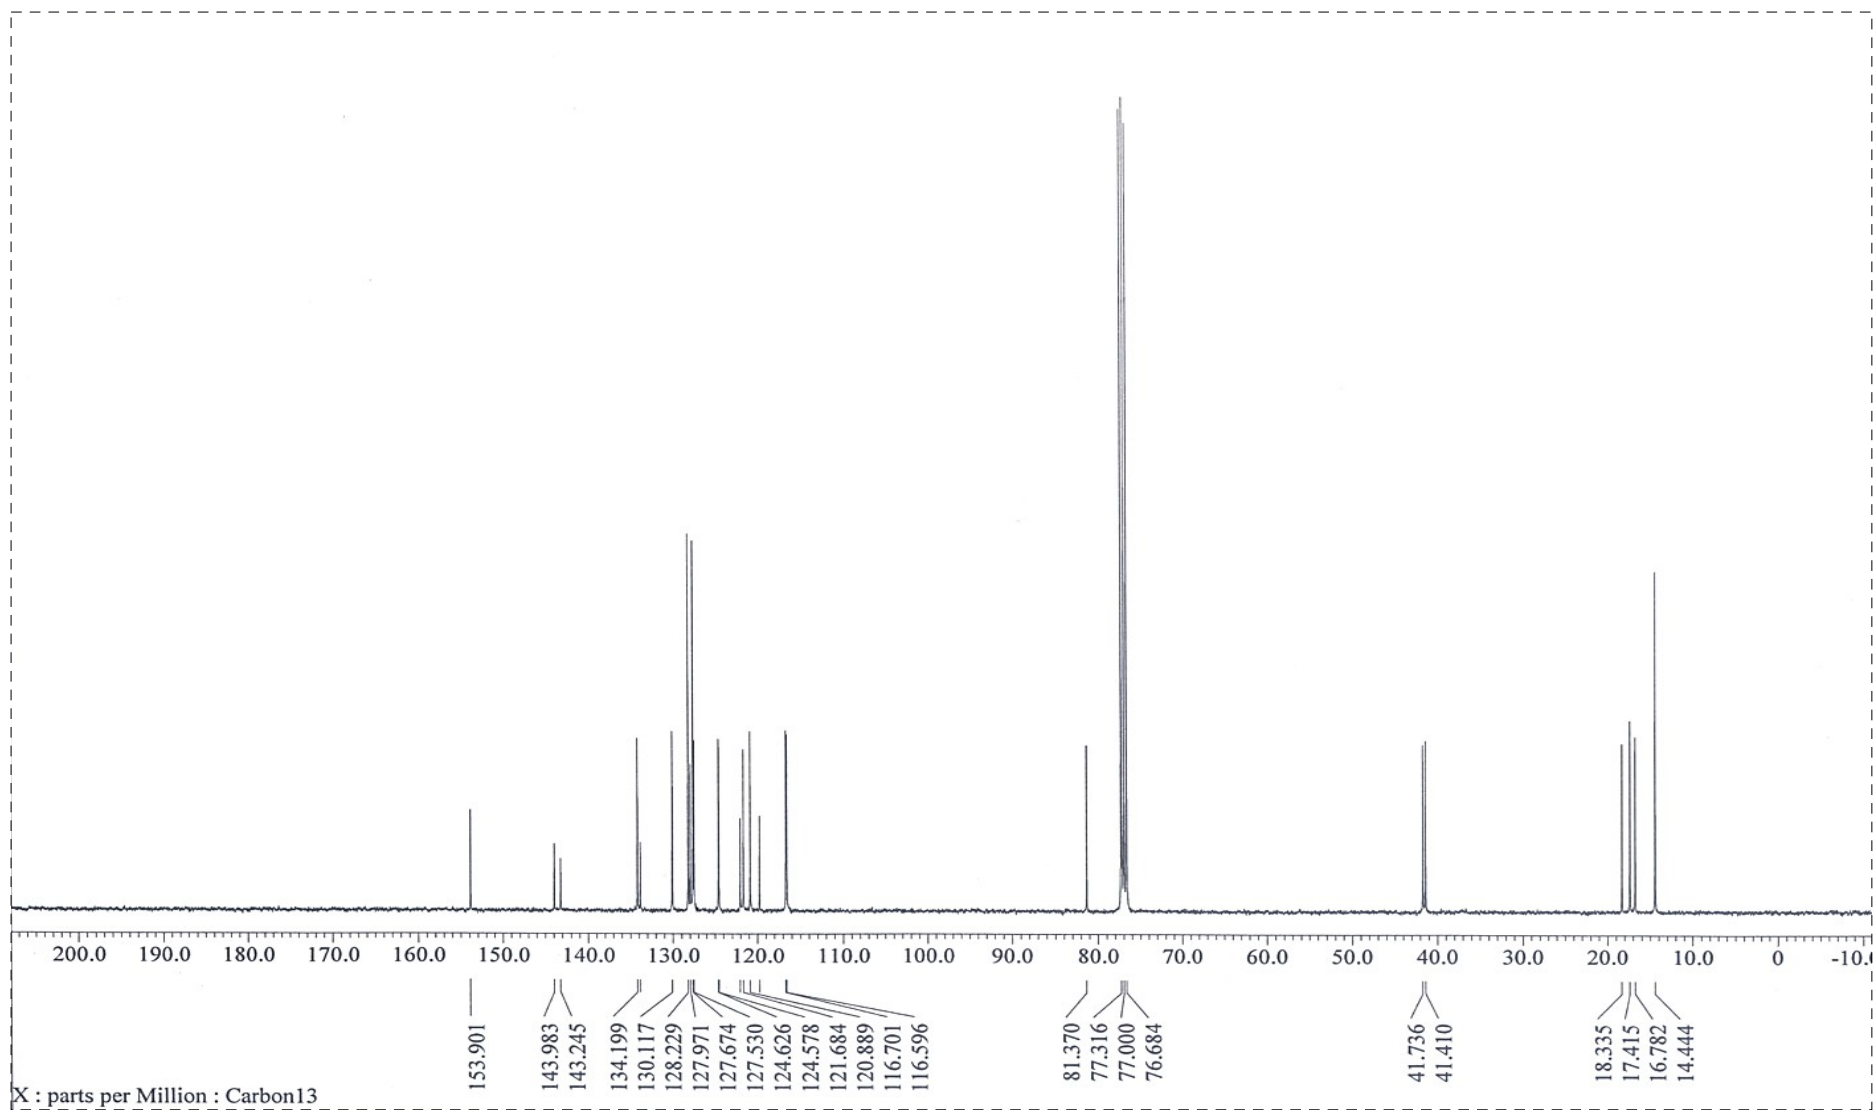

**Fig S53:**  $^{13}\text{C}$  NMR of 3-(2,2-dipropyl-2H-chromen-4-yl)-6-methyl-2-phenylimidazo-[1,2-a]pyridine (**16r**)

HSB\_RNM\_37\_R

03-Apr-2024  
17:49:48

XEVO-G2XSQTOF#NotSet

HSB\_03042024\_3 (0.053) Cu (0.05); Is (1.00, 1.00) C<sub>29</sub>H<sub>31</sub>N<sub>2</sub>O

1: TOF MS ES+  
7.22e12

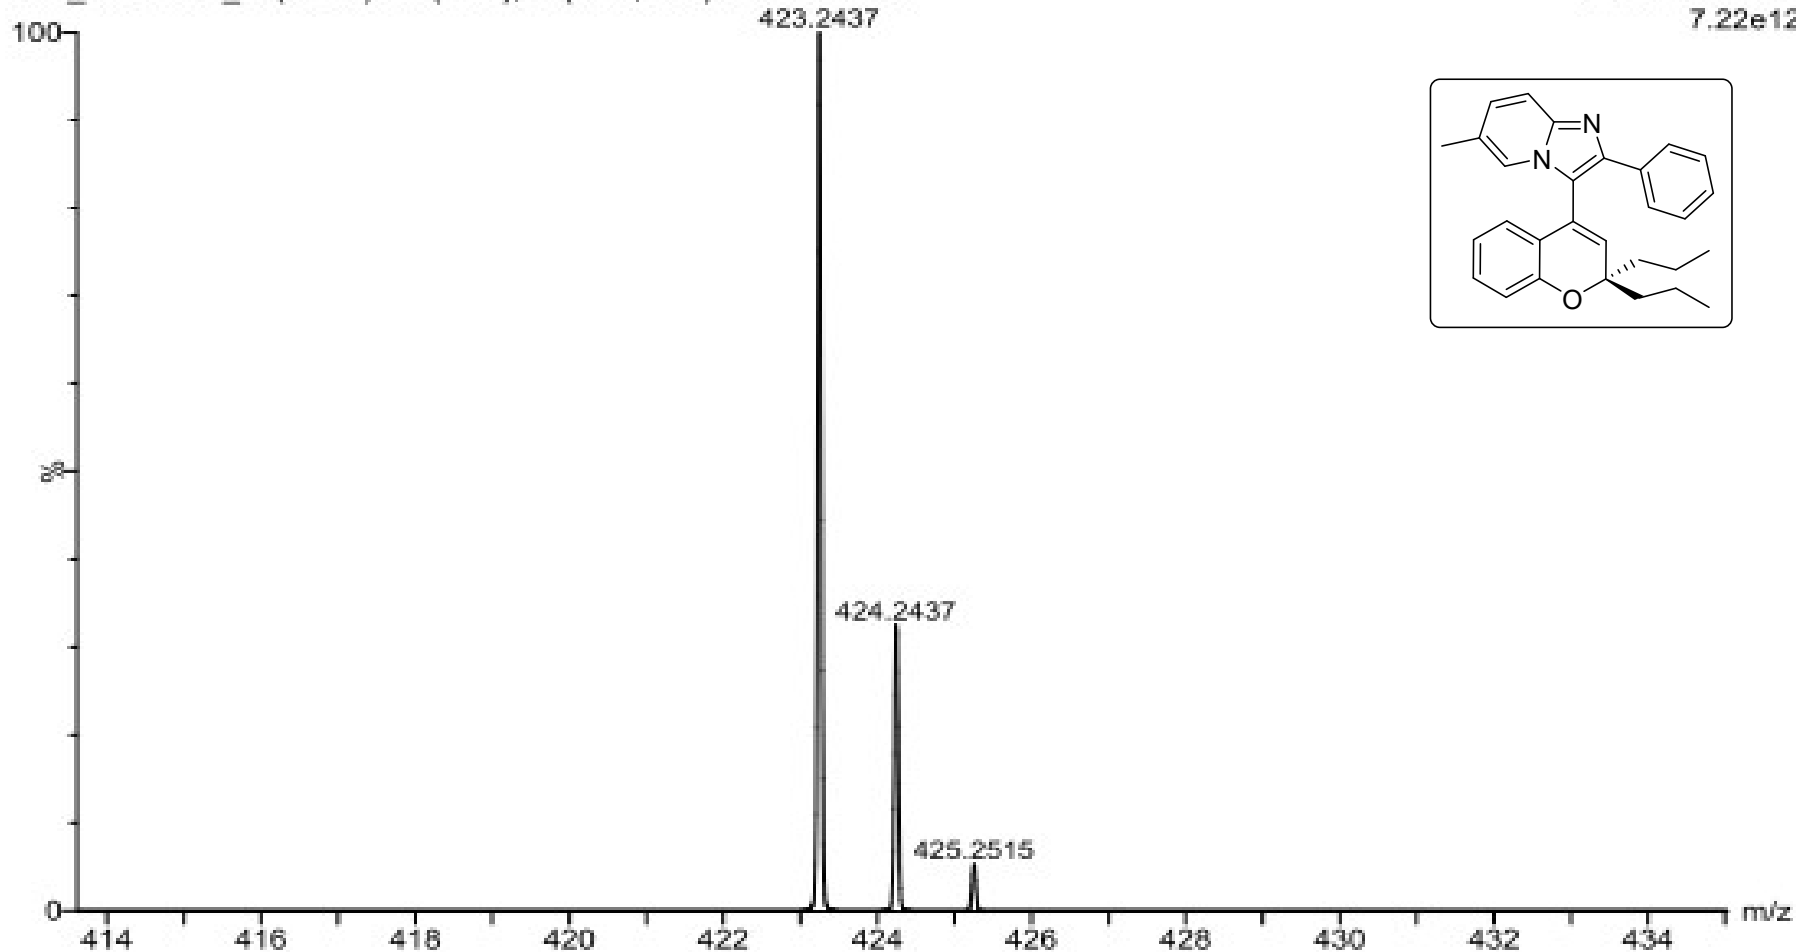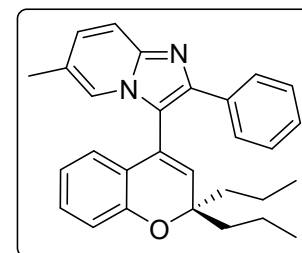

Fig S54: HR-MS of 3-(2,2-dipropyl-2H-chromen-4-yl)-6-methyl-2-phenylimidazo-[1,2-a]pyridine (**16r**)

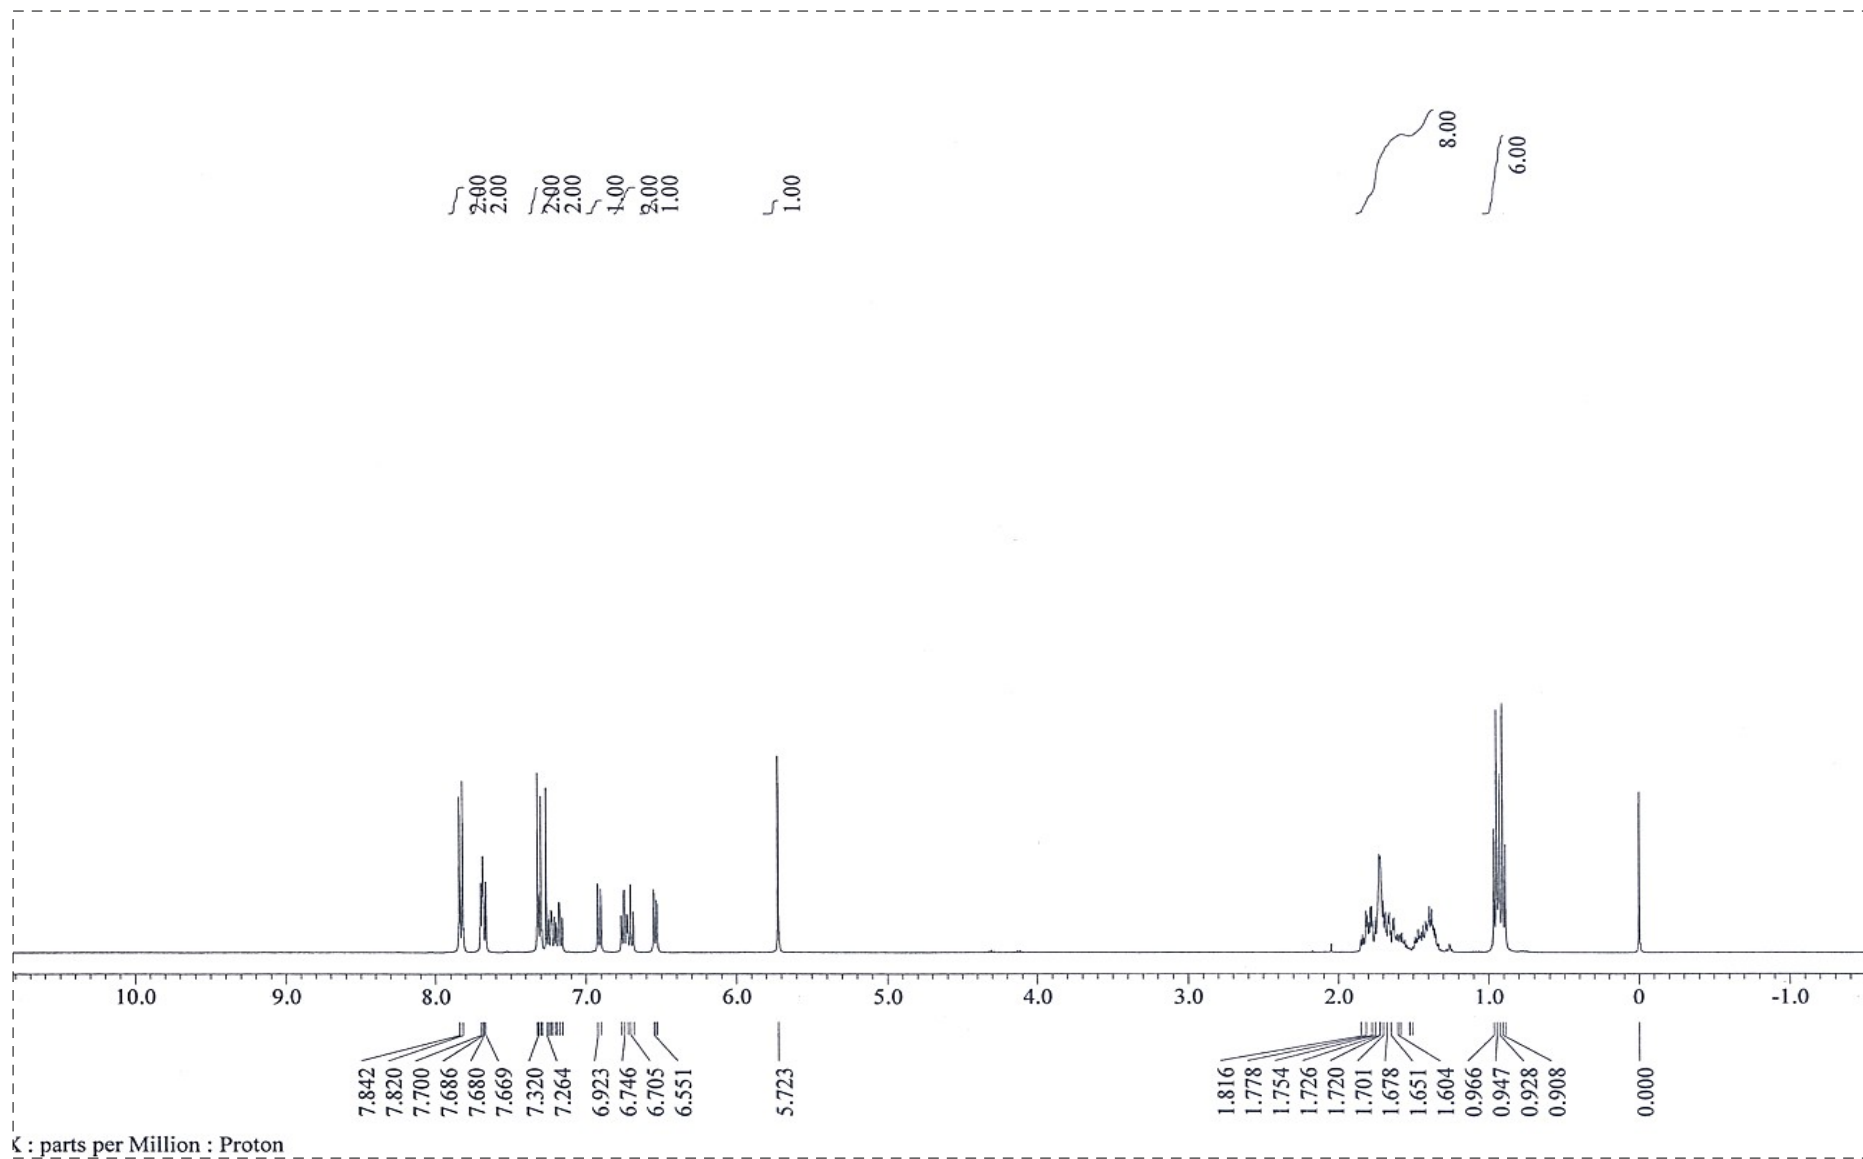

**Fig S55:**  $^1\text{H}$  NMR of 2-(4-chlorophenyl)-3-(2,2-dipropyl-2H-chromen-4-yl)-imidazo-[1,2-a]pyridine (**16s**)



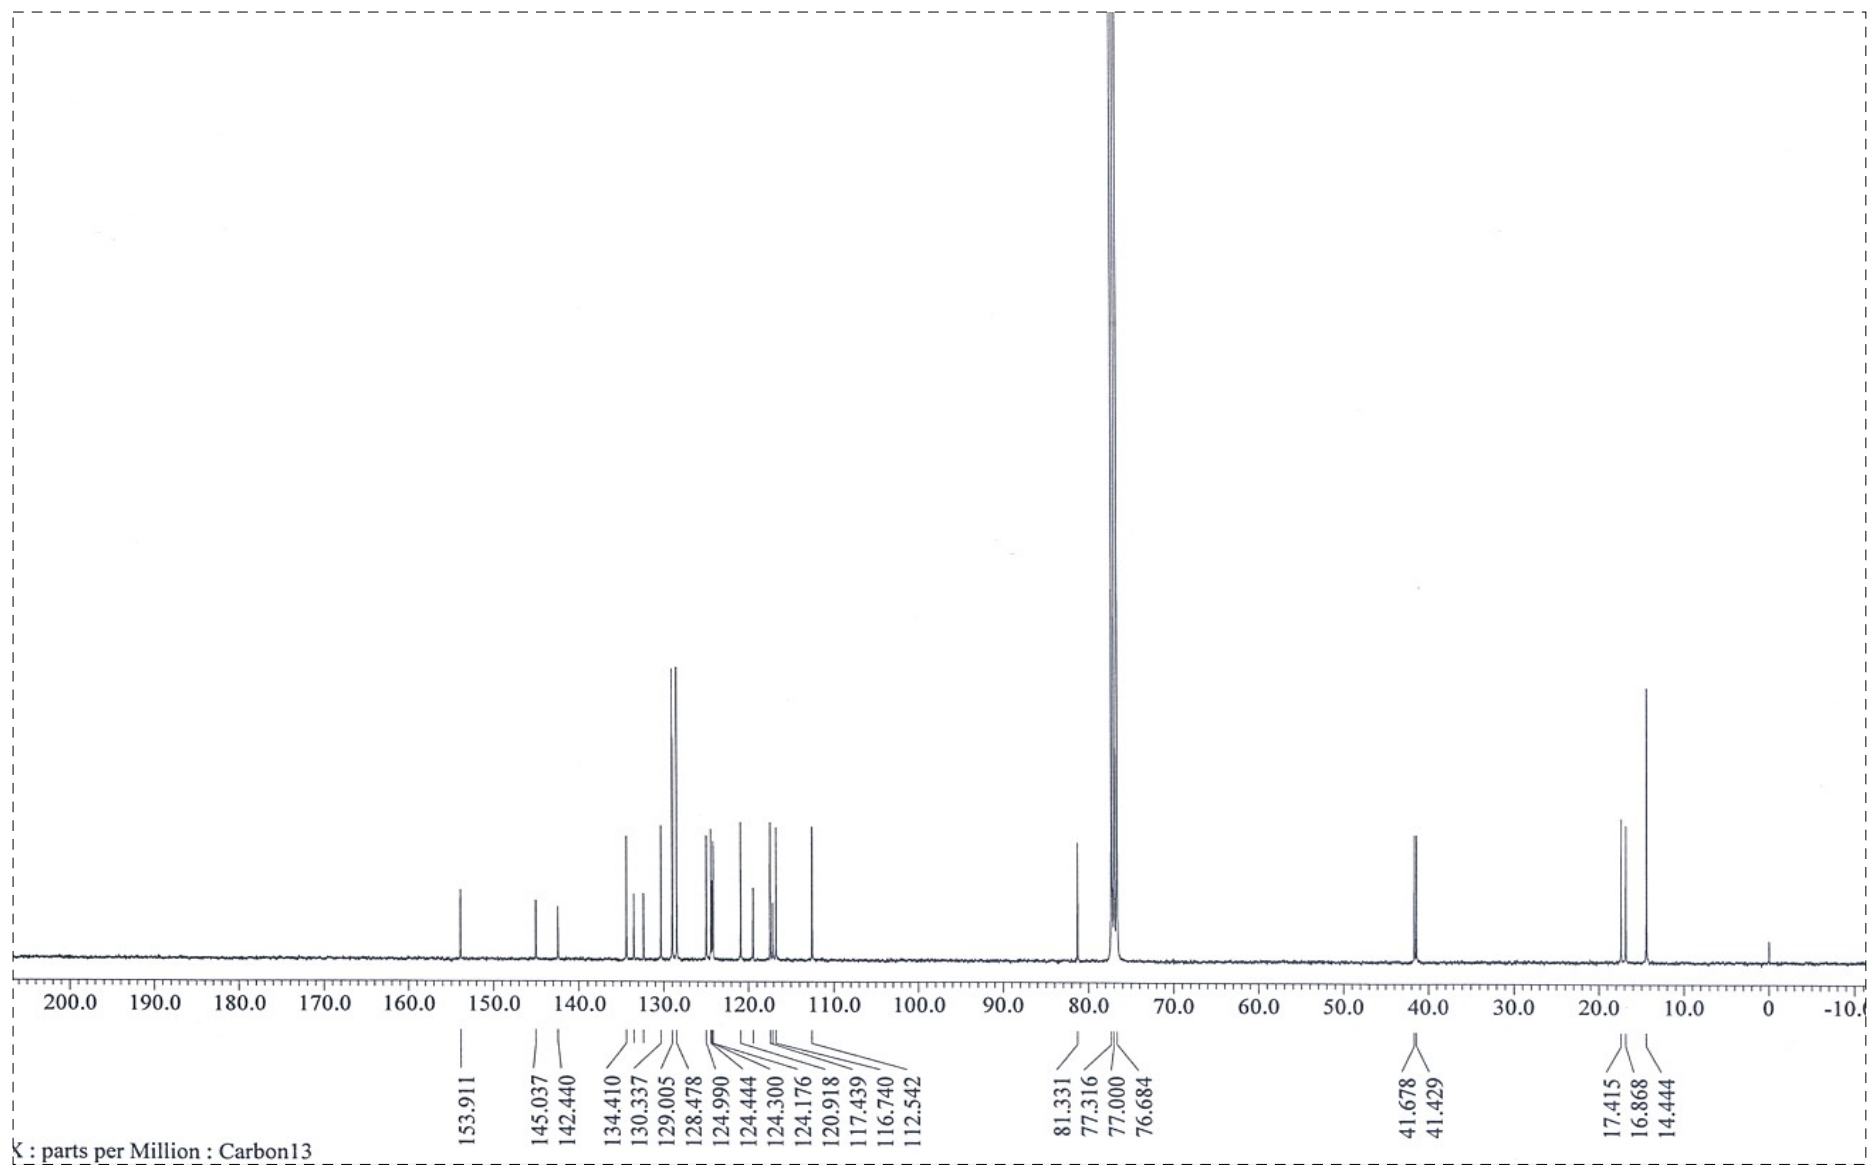

**Fig S56:**  $^{13}\text{C}$  NMR of 2-(4-chlorophenyl)-3-(2,2-dipropyl-2H-chromen-4-yl)-imidazo-[1,2-a]pyridine (**16s**)

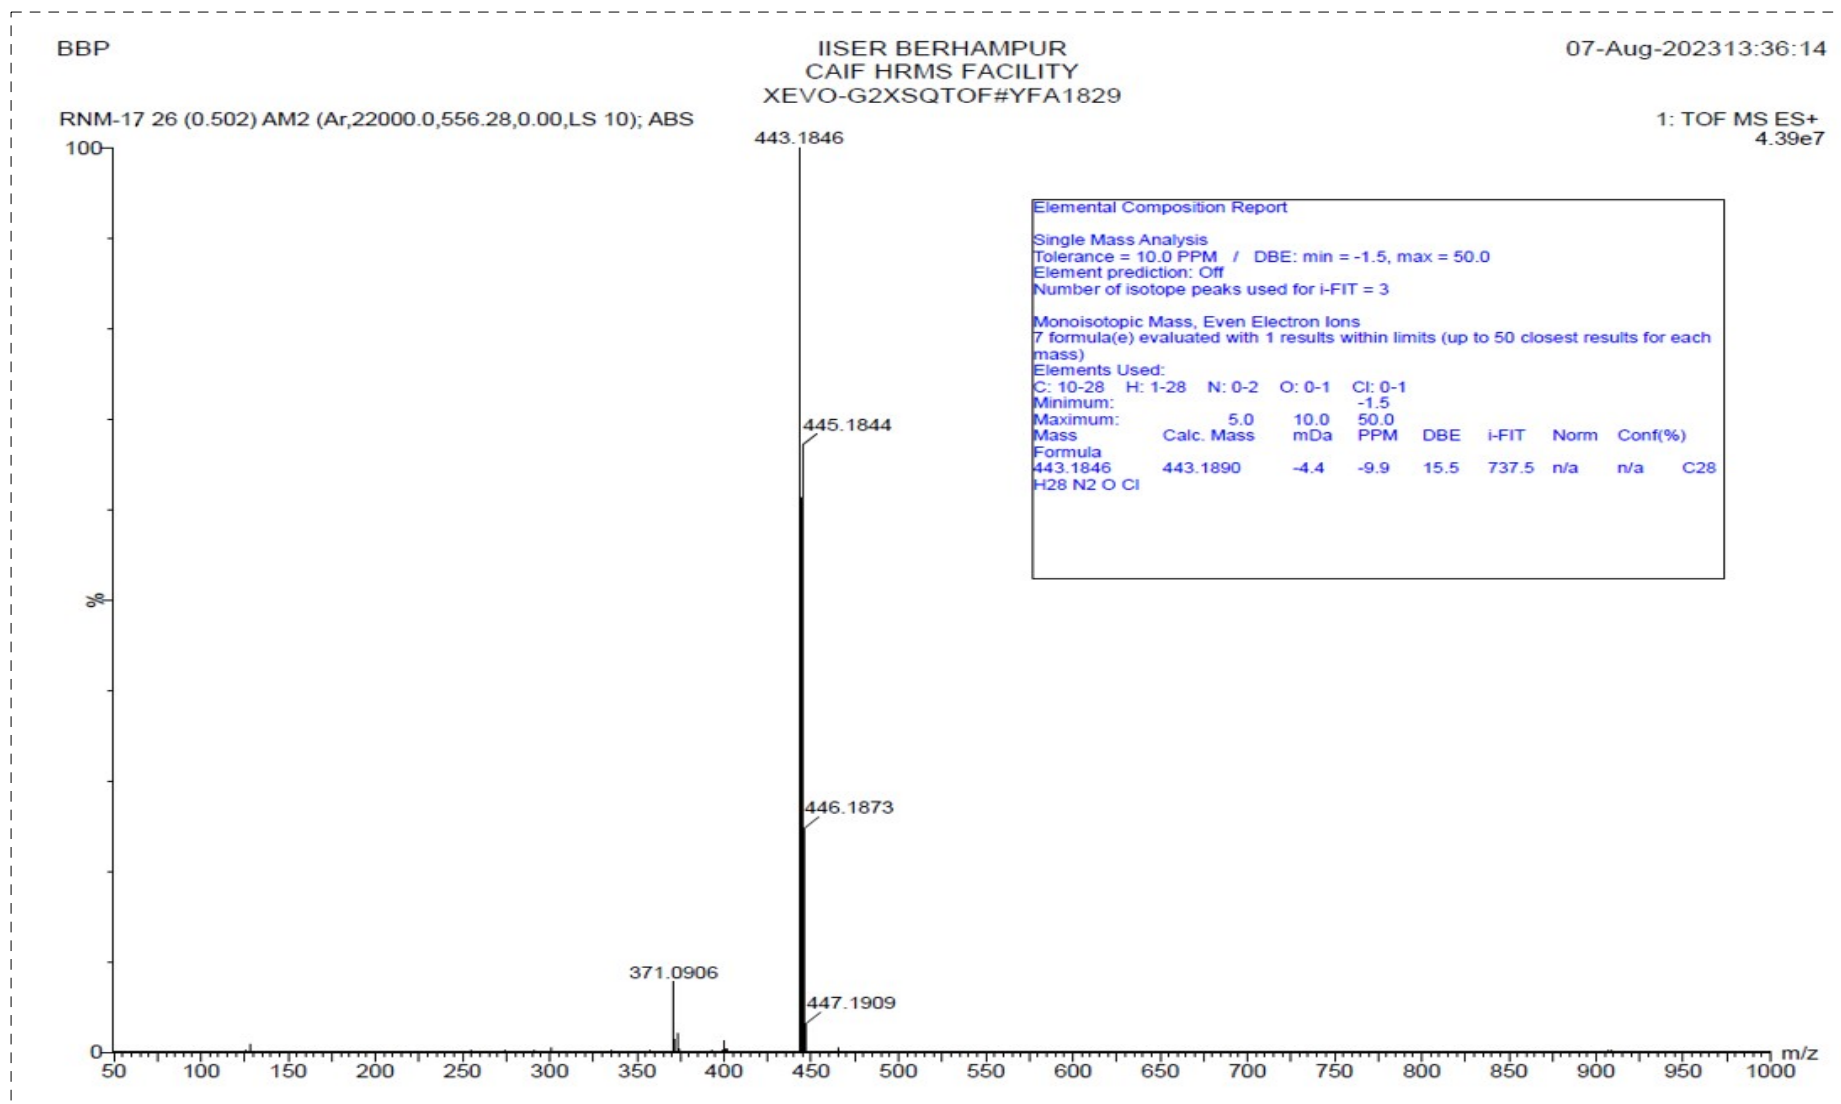

Fig S57: HR-MS of 2-(4-chlorophenyl)-3-(2, 2-dipropyl-2H-chromen-4-yl)-imidazo-[1,2-a]pyridine (16s)

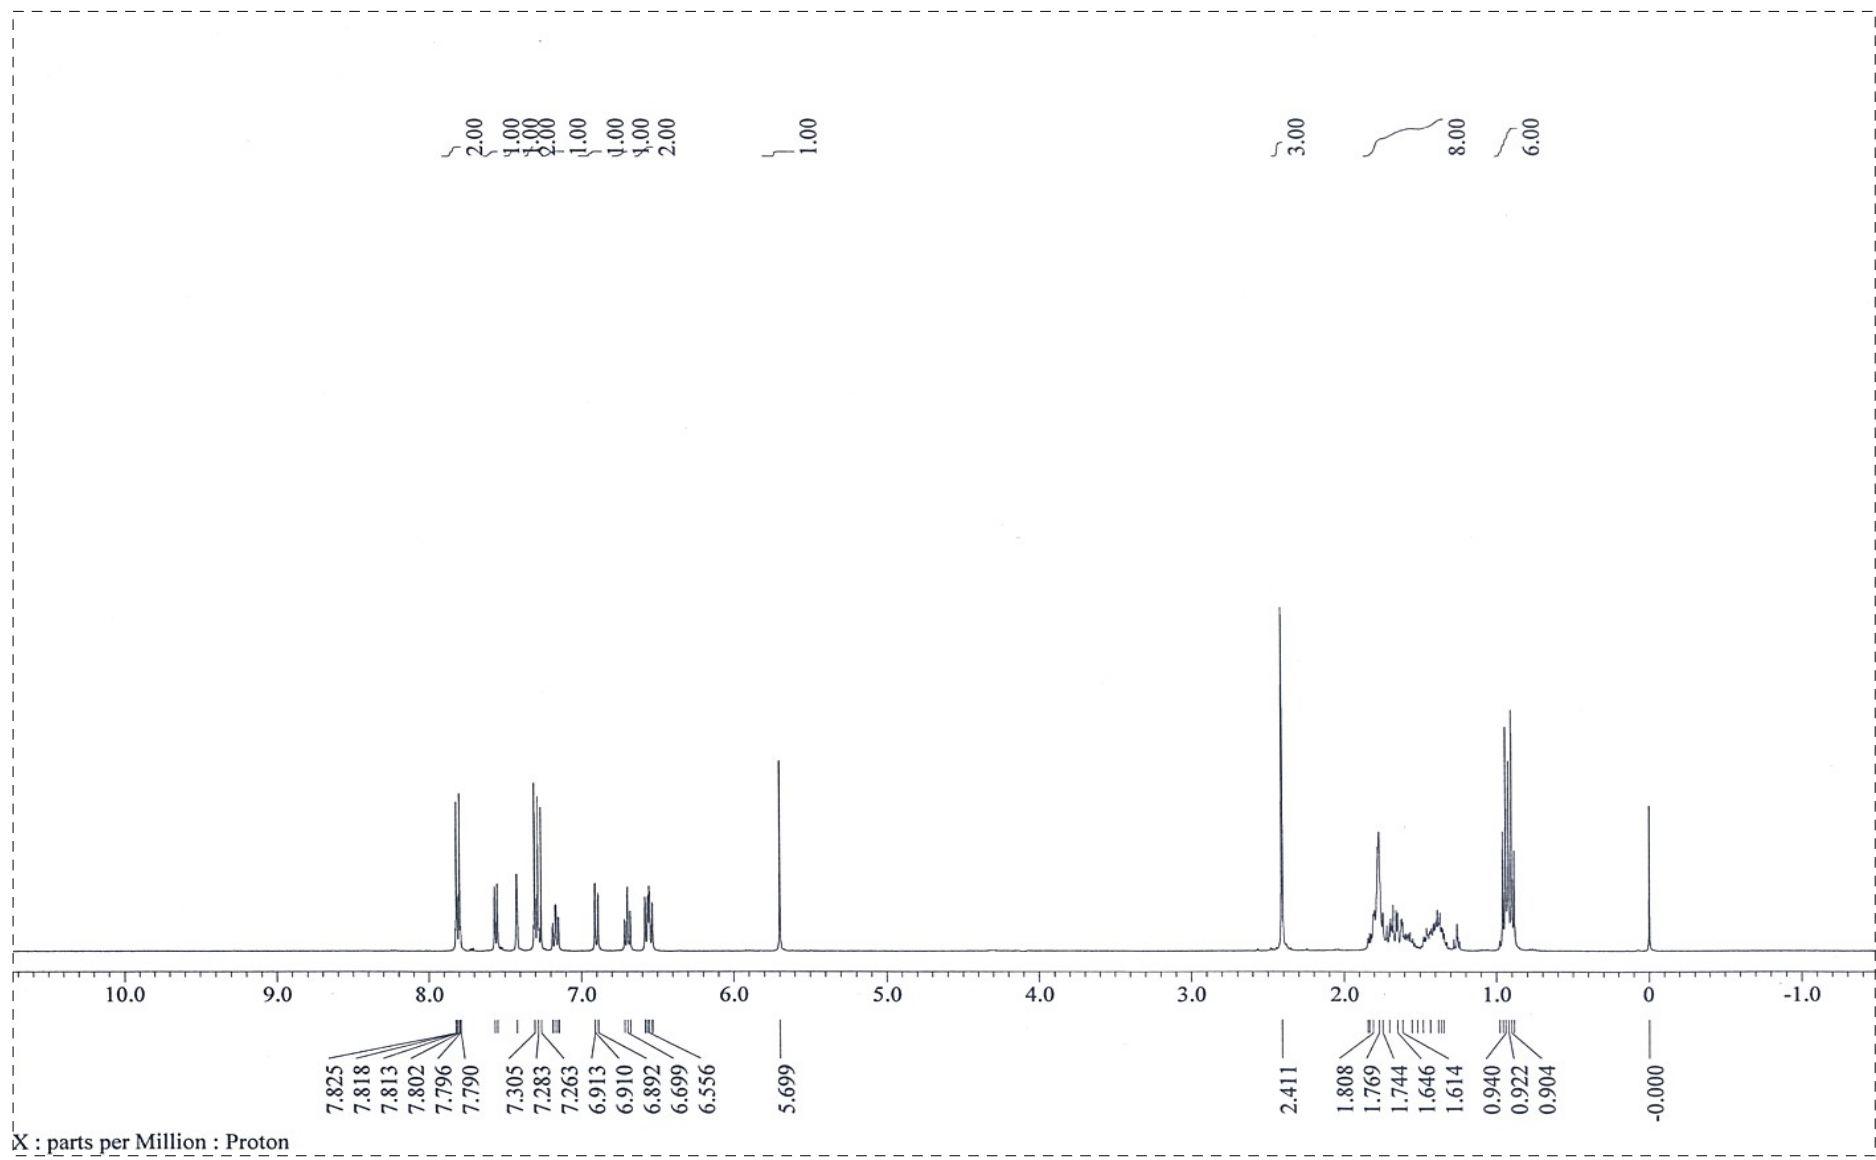

**Fig S58:**  $^1\text{H}$  NMR of 2-(4-chlorophenyl)-3-(2,2-dipropyl-2H-chromen-4-yl)-7-methylimidazo[1,2-a]pyridine (**16t**)

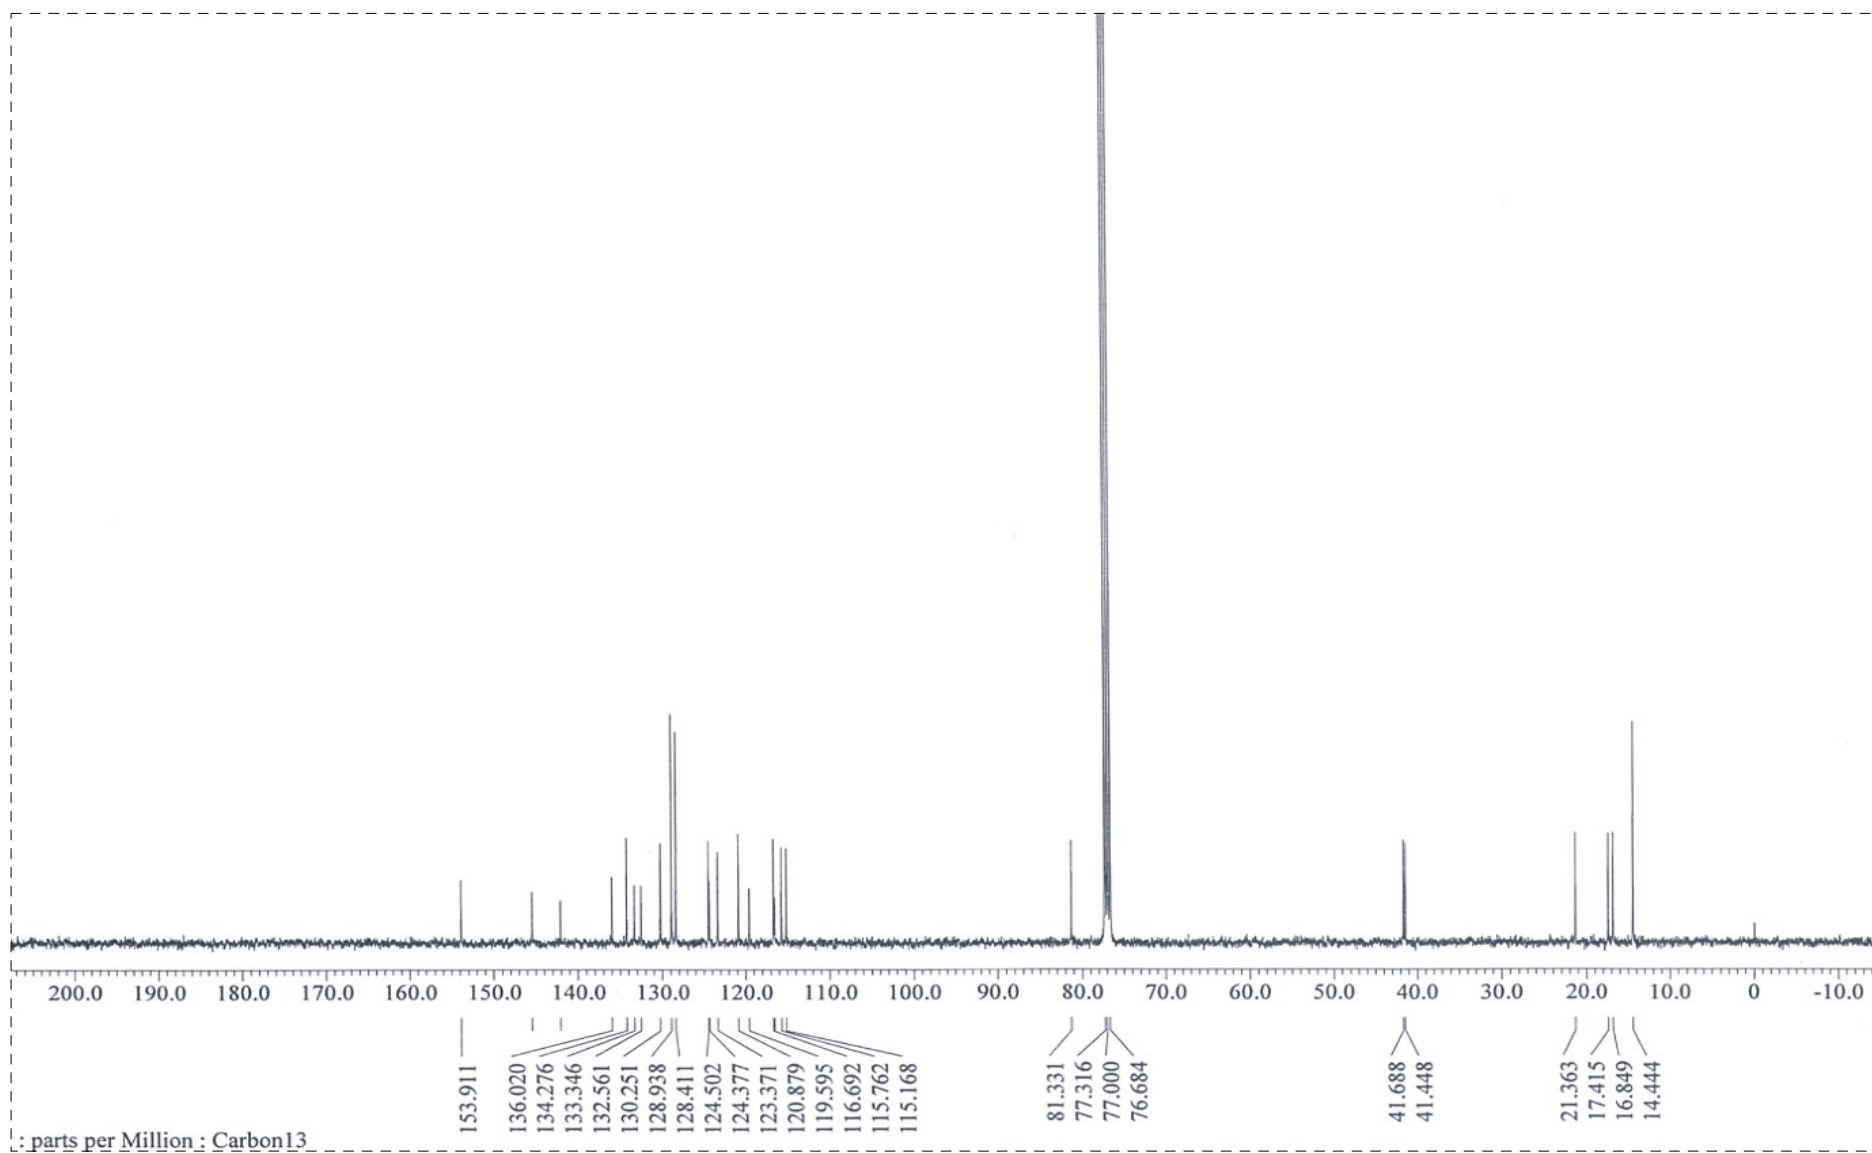

**Fig S59:** <sup>13</sup>C NMR of 2-(4-chlorophenyl)-3-(2,2-dipropyl-2H-chromen-4-yl)-7-methylimidazo[1,2-a]pyridine (**16t**)

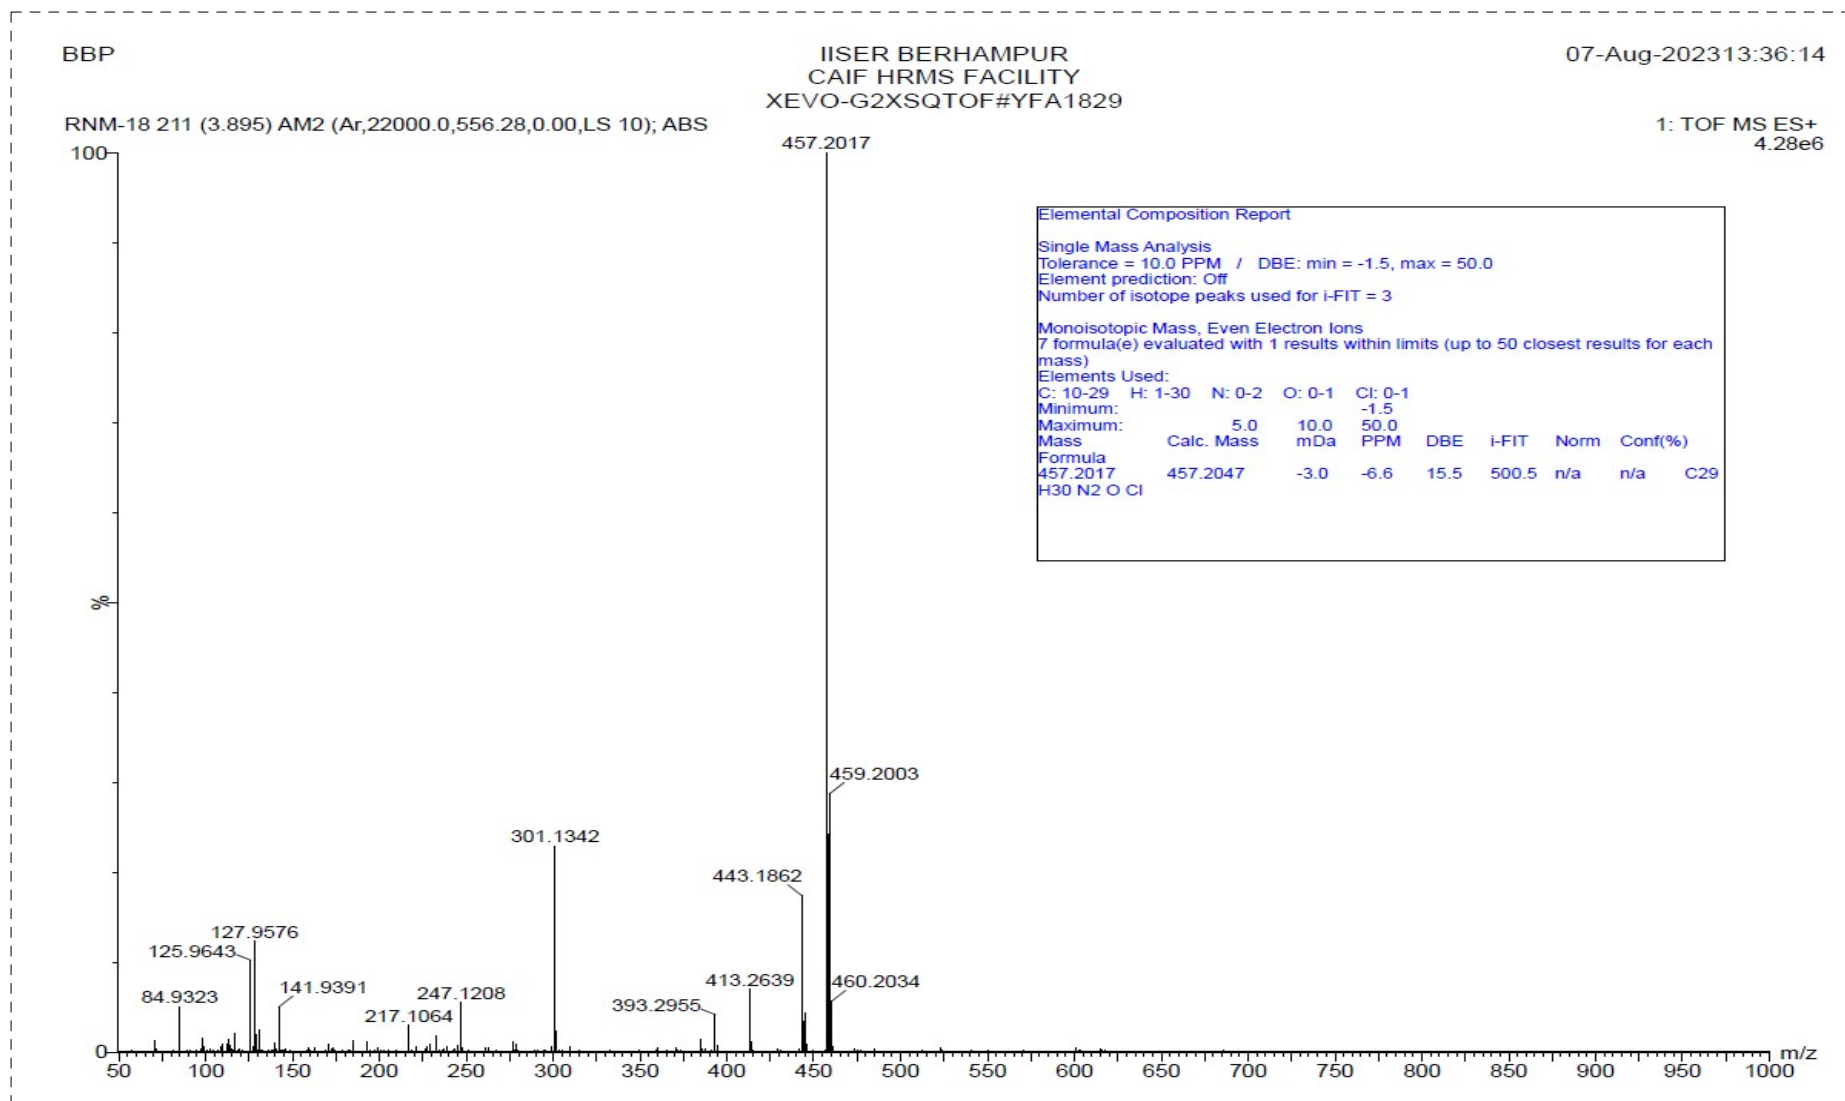

**Fig S60:** HR-MS of 2-(4-chlorophenyl)-3-(2,2-dipropyl-2H-chromen-4-yl)-7-methylimidazo[1,2-a]pyridine (**16t**)

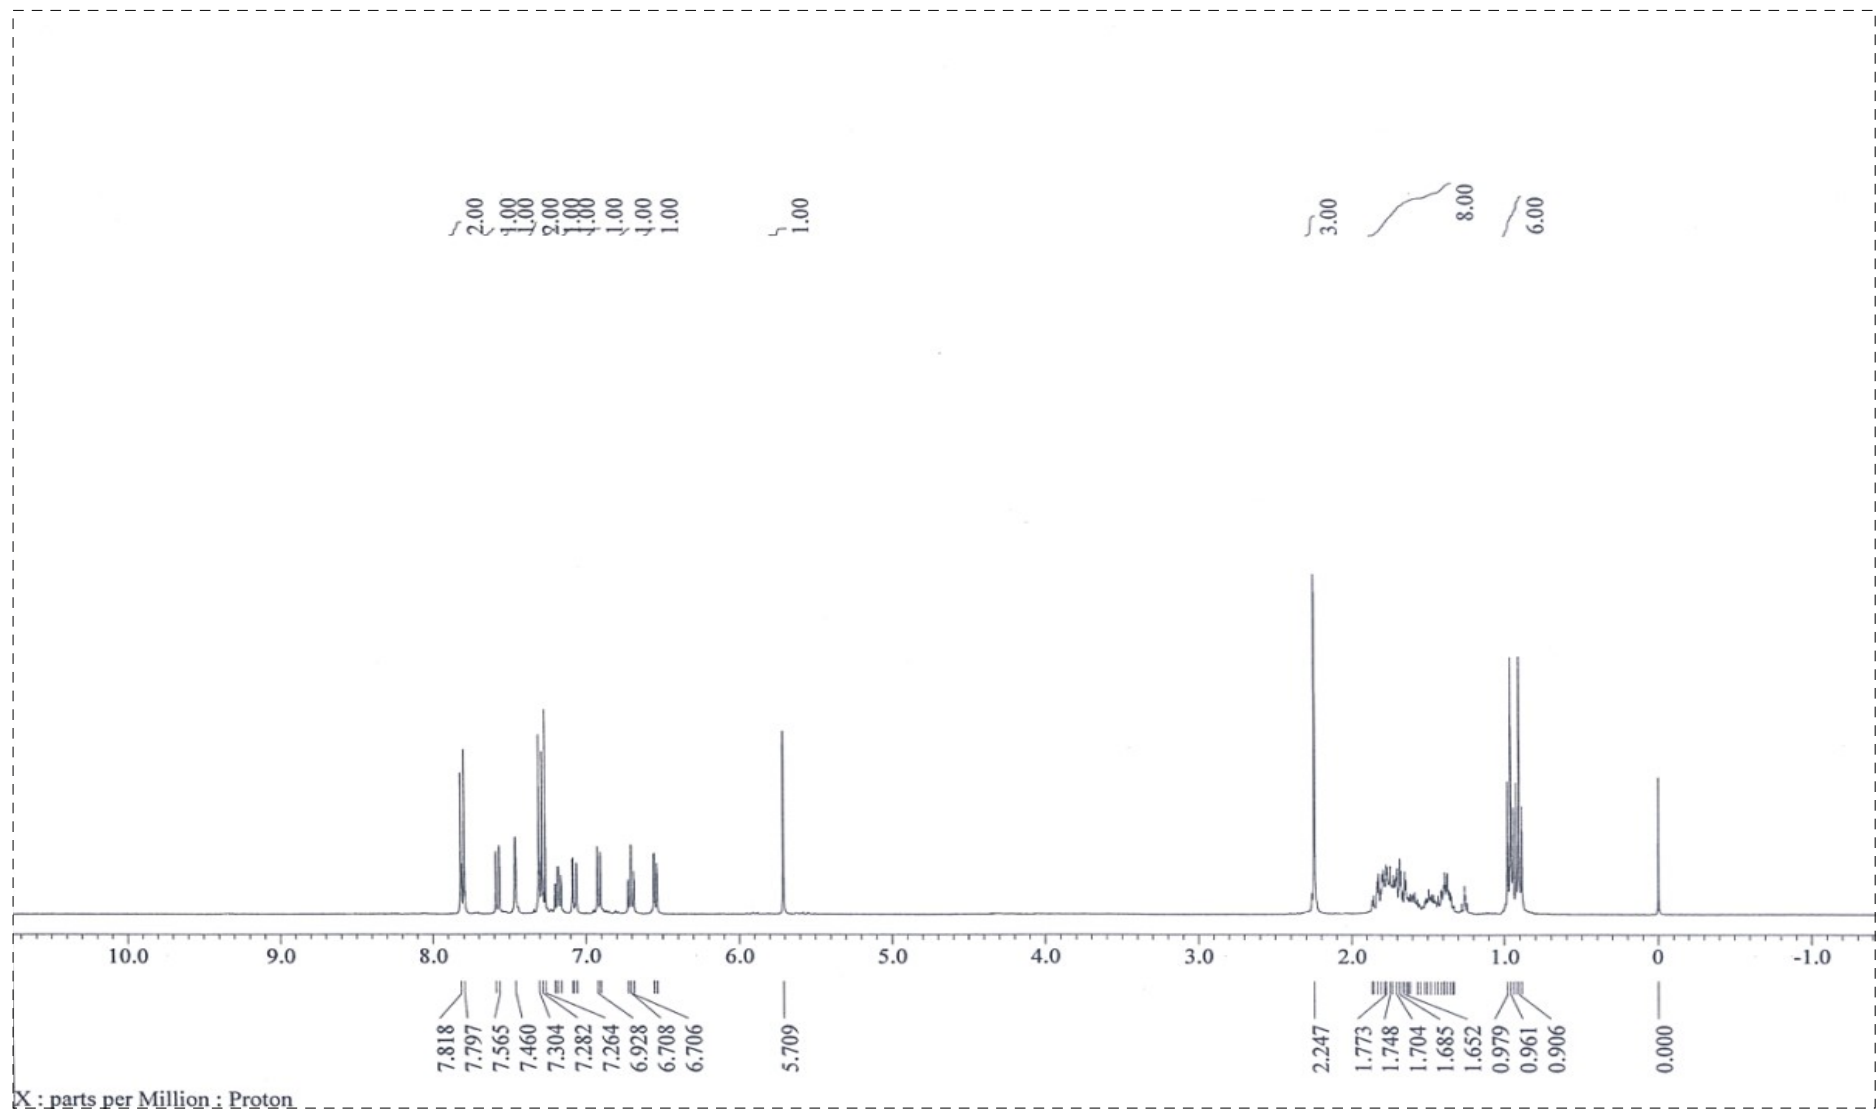

**Fig S61:** <sup>1</sup>H NMR of 2-(4-chlorophenyl)-3-(2,2-dipropyl-2H-chromen-4-yl)-7,6-methylimidazo-[1,2-a]pyridine (**16u**)

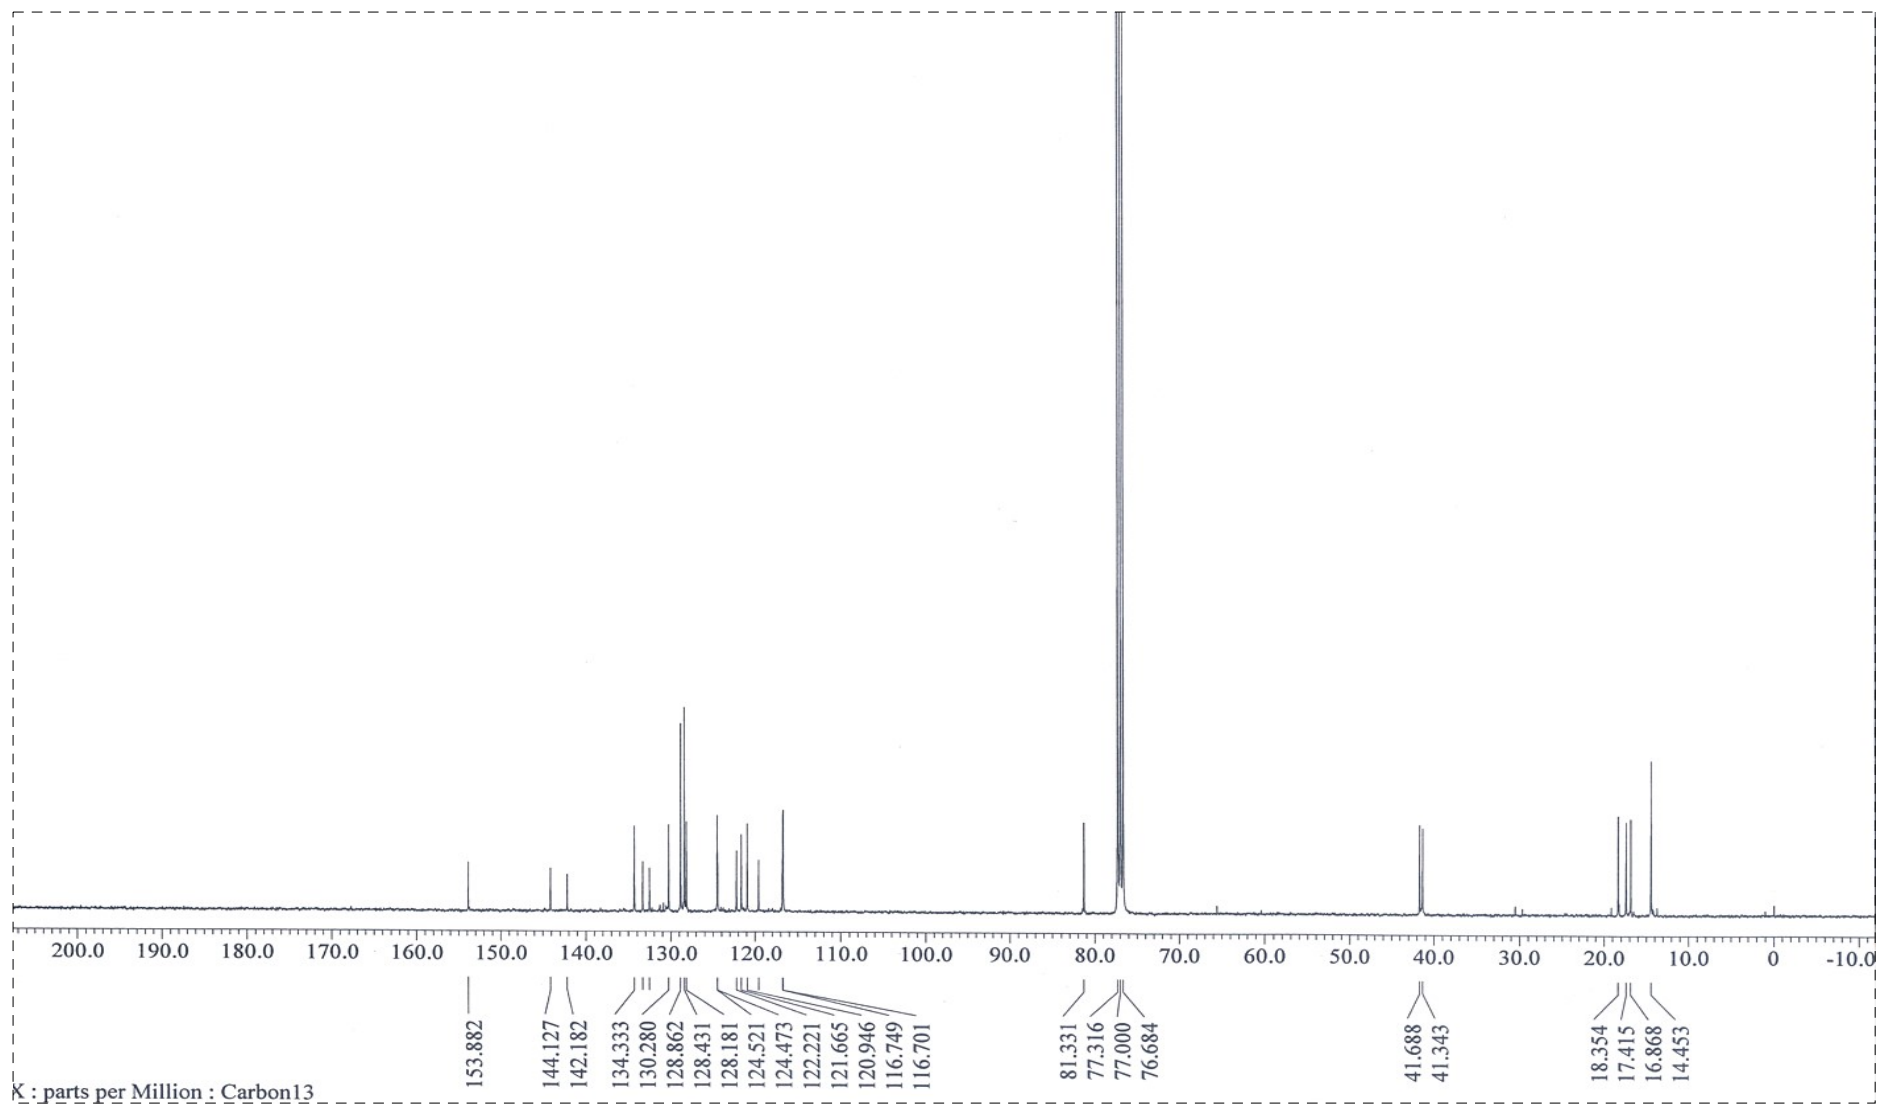

**Fig S62:**  $^{13}\text{C}$  NMR of 2-(4-chlorophenyl)-3-(2,2-dipropyl-2H-chromen-4-yl)-7,6-methylimidazo-[1,2-a]pyridine (**16u**)

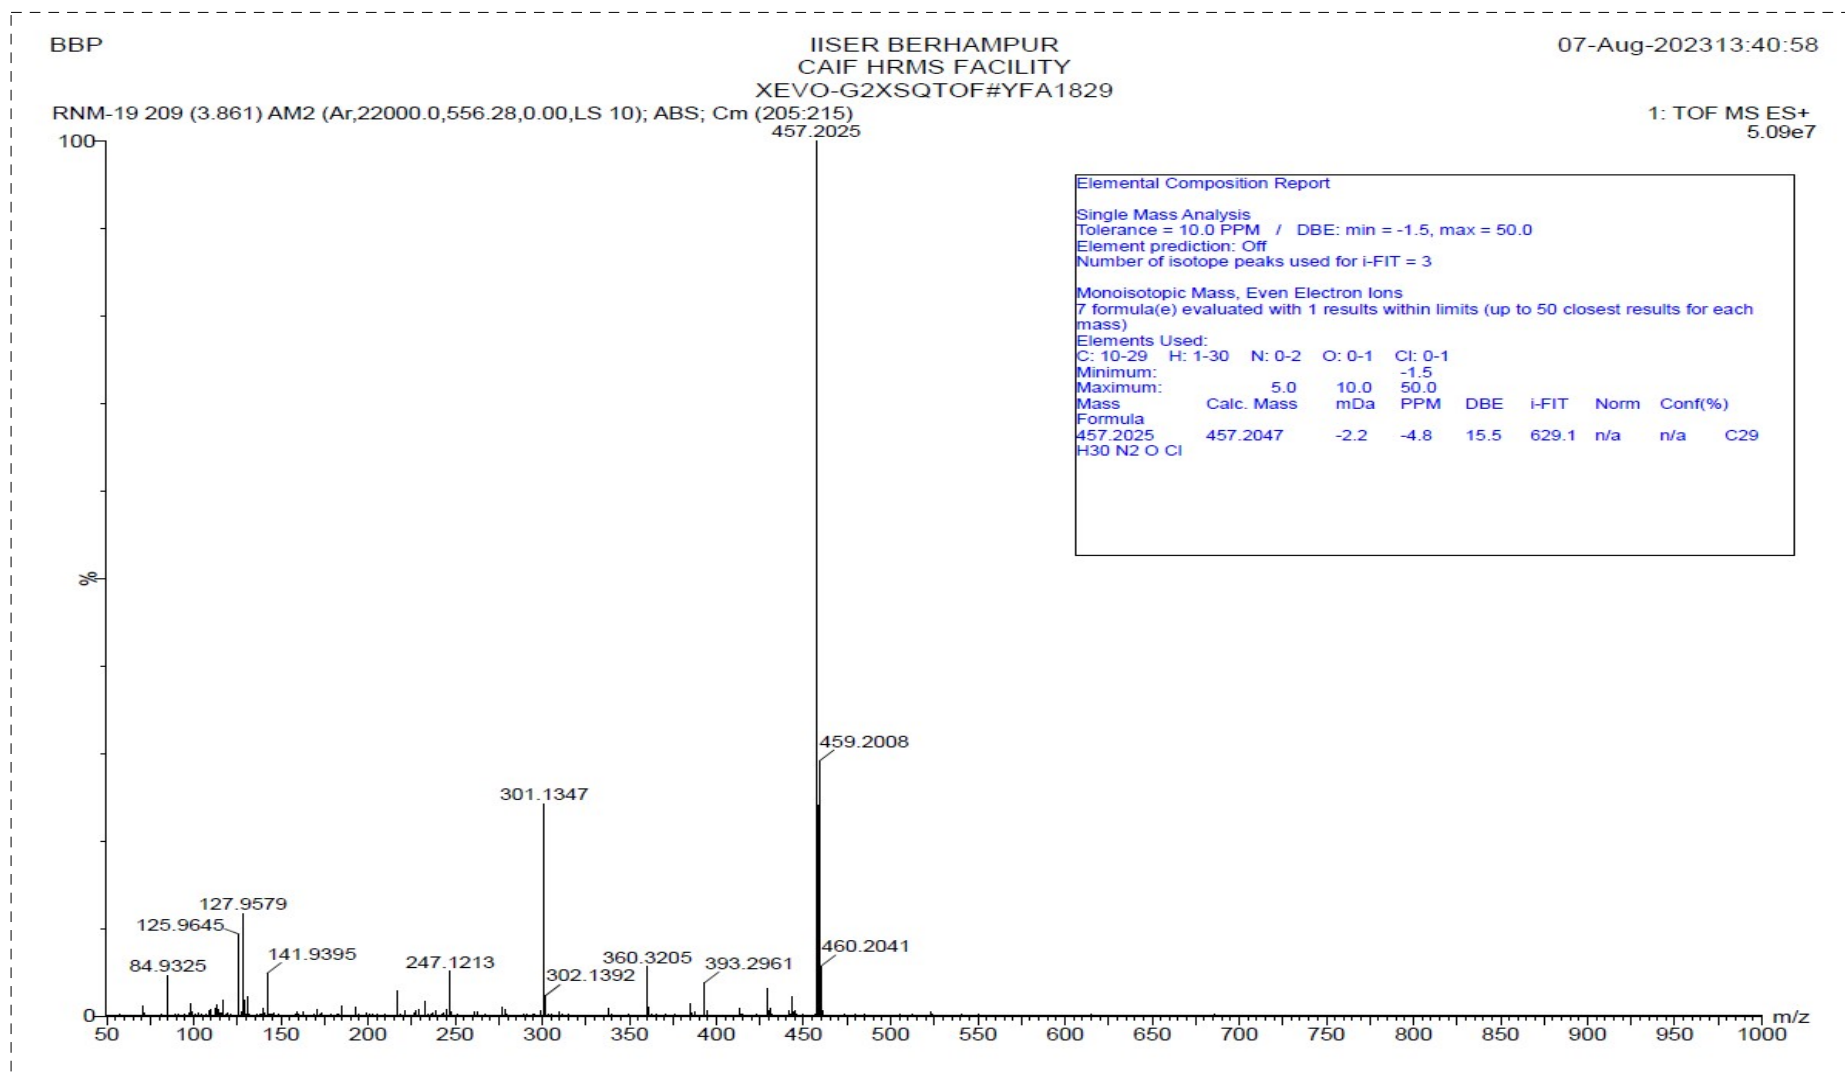

**Fig S63:** HR-MS of 2-(4-chlorophenyl)-3-(2,2-dipropyl-2H-chromen-4-yl)-7-6-methylimidazo-[1,2-a]pyridine (**16u**)



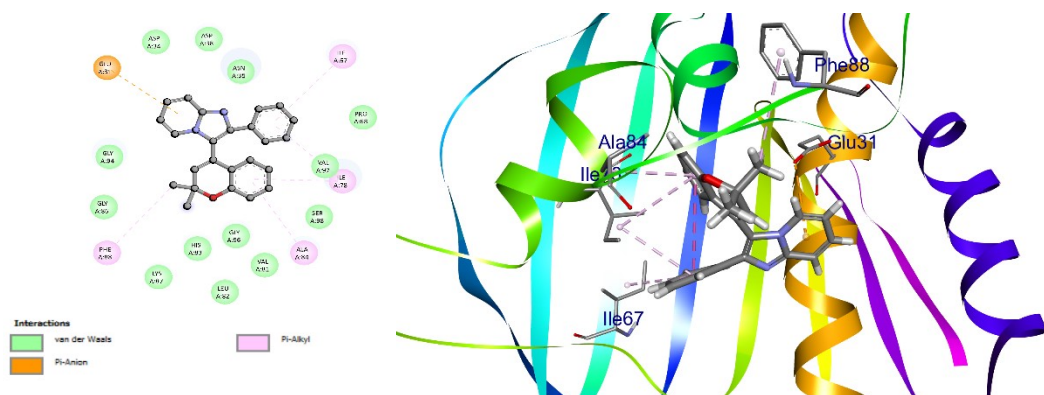

**Fig. S64.** Docking interaction and 3D binding image of compound **16a** with *E. coli* DNA gyrase (PDBID: 1AJ6)

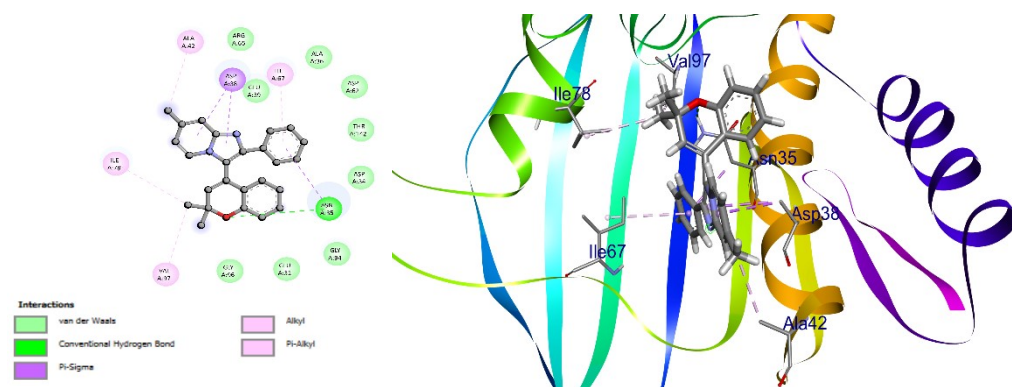

**Fig. S65.** Docking interaction and 3D binding image of compound **16b** with *E. coli* DNA gyrase (PDBID: 1AJ6)

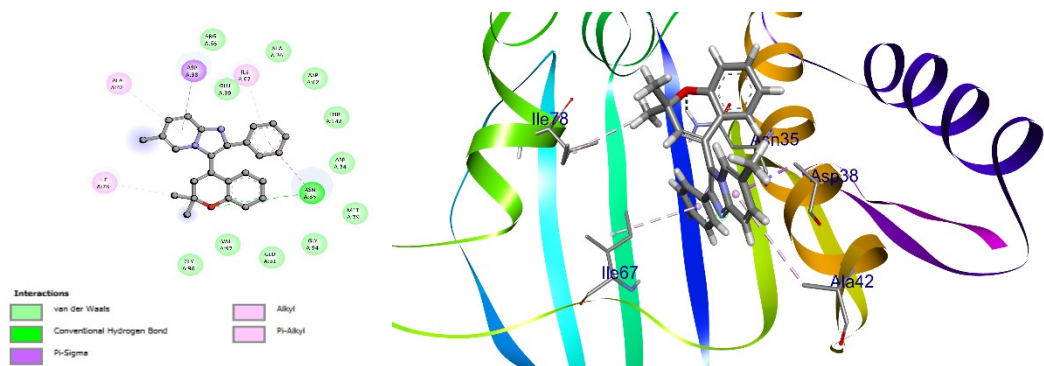

**Fig. S66.** Docking interaction and 3D binding image of compound **16c** with *E. coli* DNA gyrase (PDBID: 1AJ6)

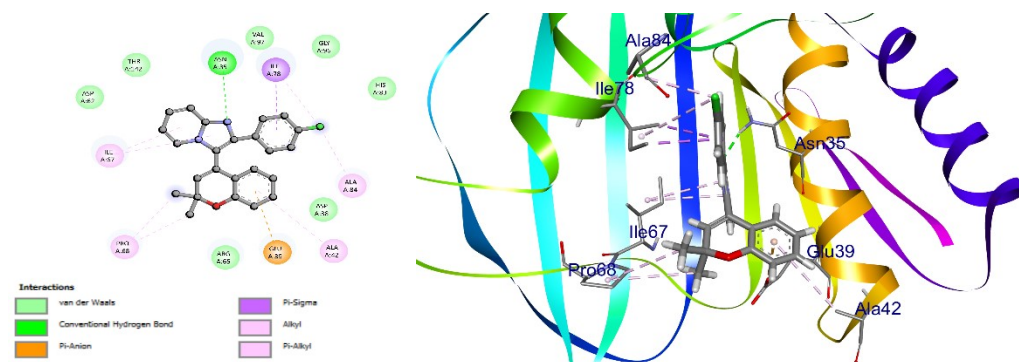

**Fig. S67.** Docking interaction and 3D binding image of compound **16d** with *E. coli* DNA gyrase (PDBID: 1AJ6)

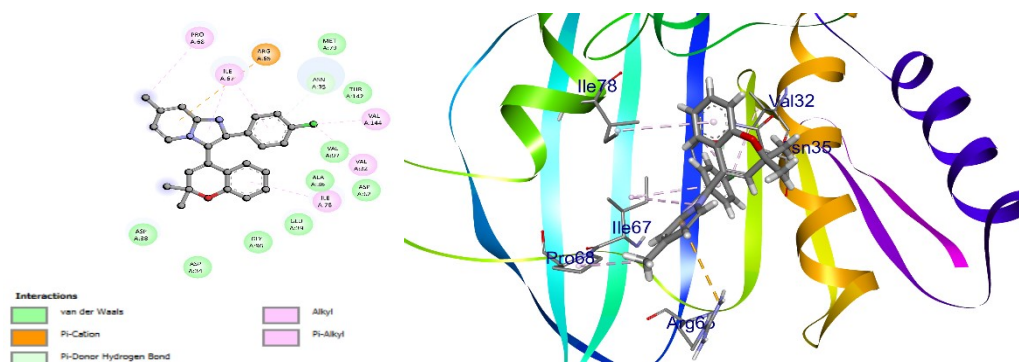

**Fig. S68.** Docking interaction and 3D binding image of compound **16e** with *E. coli* DNA gyrase (PDBID: 1AJ6)

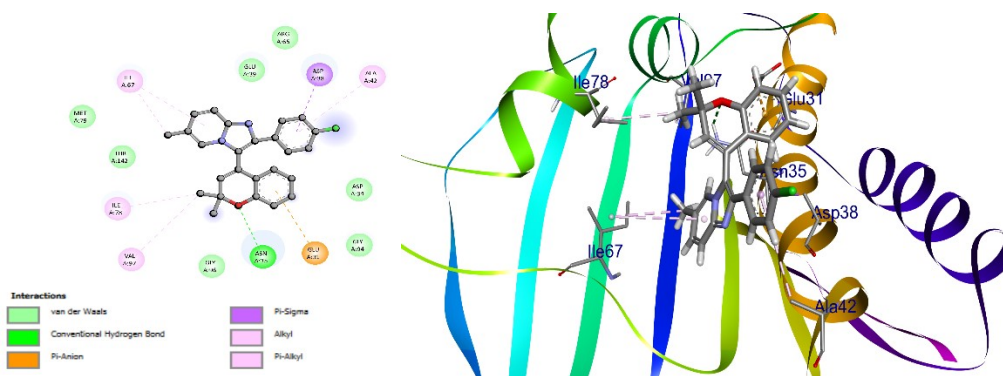

**Fig. S69.** Docking interaction and 3D binding image of compound **16f** with *E. coli* DNA gyrase (PDBID: 1AJ6)

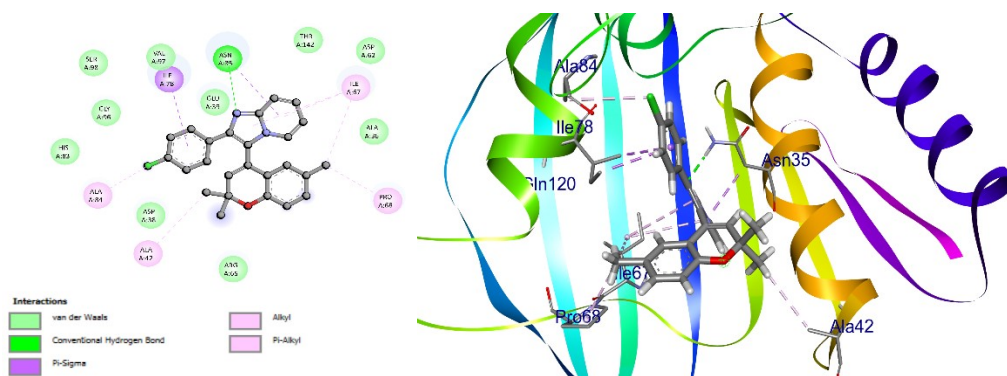

**Fig. S70.** Docking interaction and 3D binding image of compound **16g** with *E. coli* DNA gyrase (PDBID: 1AJ6)

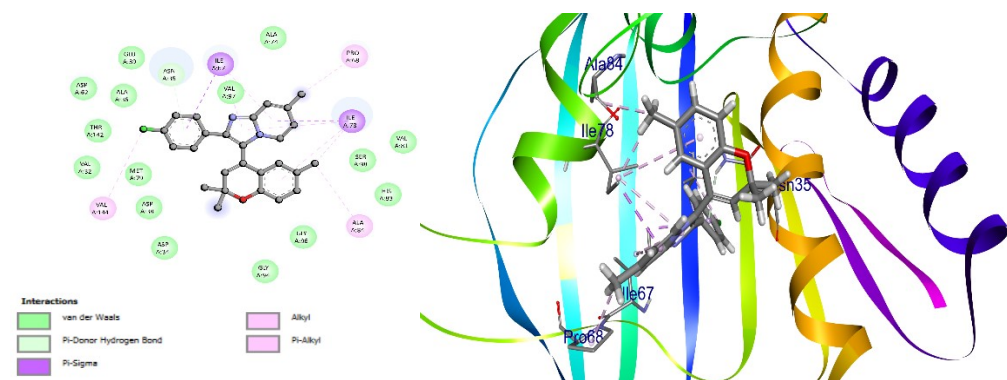

**Fig. S71.** Docking interaction and 3D binding image of compound **16h** with *E. coli* DNA gyrase (PDBID: 1AJ6)

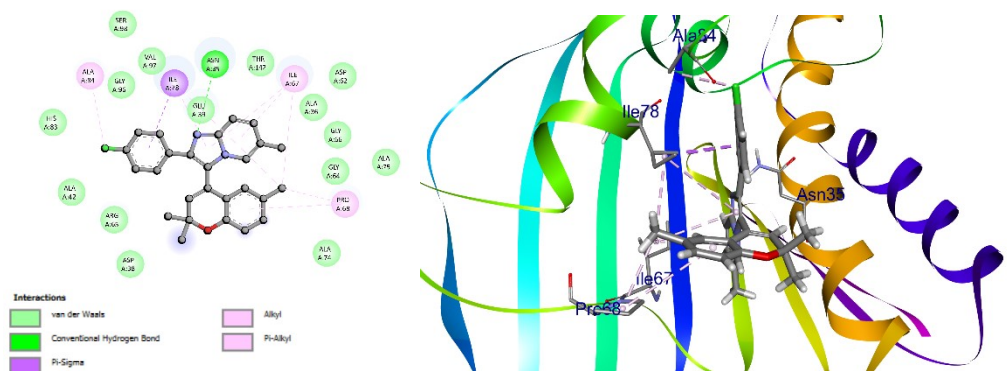

**Fig. S72.** Docking interaction and 3D binding image of compound **16i** with *E. coli* DNA gyrase (PDBID: 1AJ6)

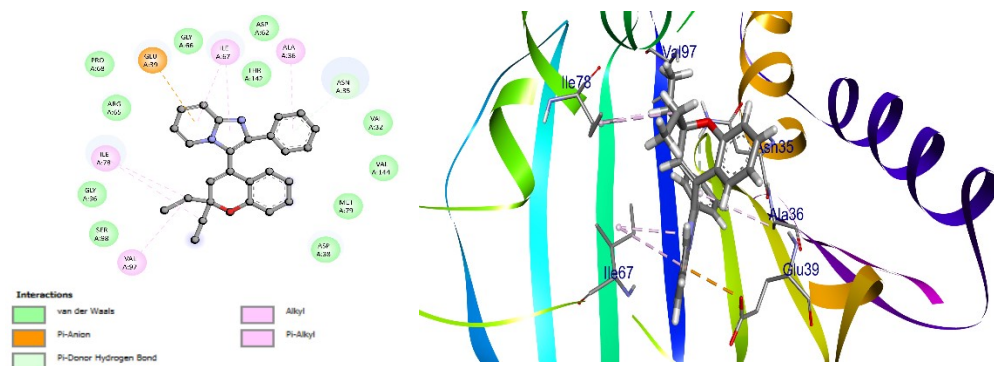

**Fig. S73.** Docking interaction and 3D binding image of compound **16j** with *E. coli* DNA gyrase (PDBID: 1AJ6)

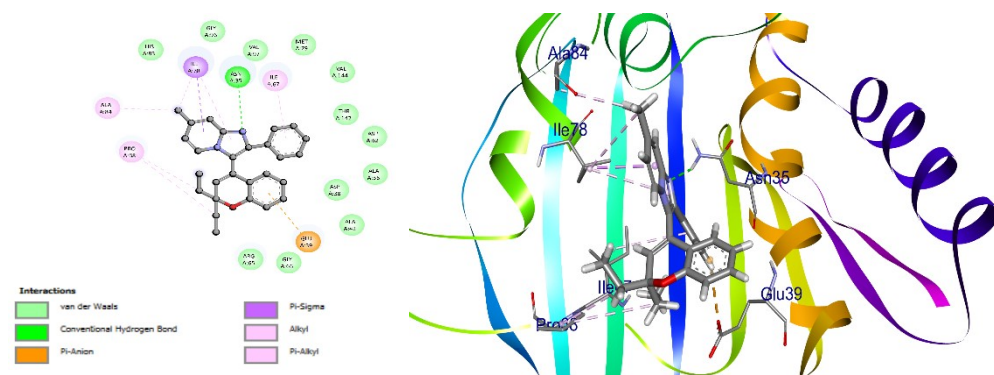

**Fig. S74.** Docking interaction and 3D binding image of compound **16k** with *E. coli* DNA gyrase (PDBID: 1AJ6)

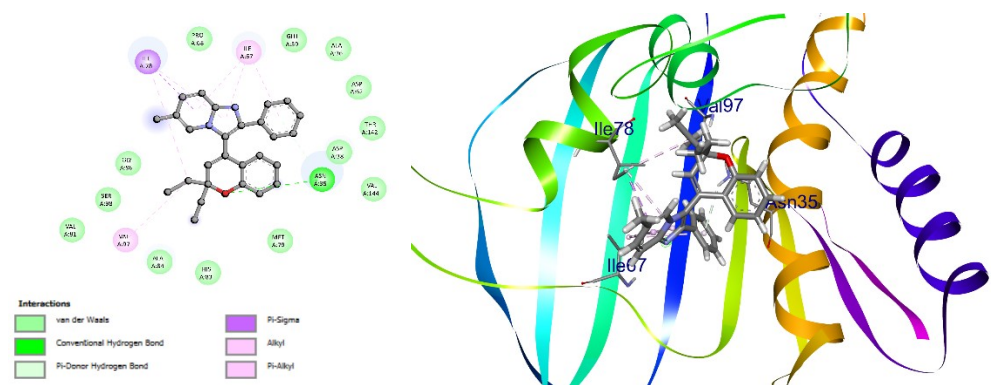

**Fig. S75.** Docking interaction and 3D binding image of compound **16l** with *E. coli* DNA gyrase (PDBID: 1AJ6)

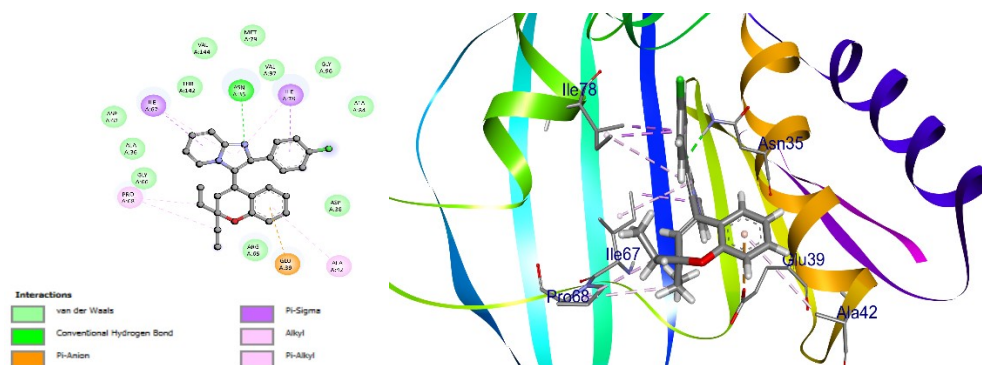

**Fig. S76.** Docking interaction and 3D binding image of compound **16m** with *E. coli* DNA gyrase (PDBID: 1AJ6)

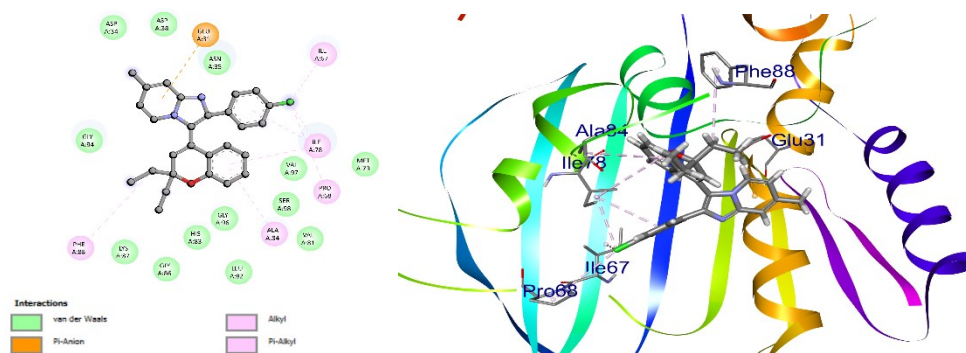

**Fig. S77.** Docking interaction and 3D binding image of compound **16n** with *E. coli* DNA gyrase (PDBID: 1AJ6)

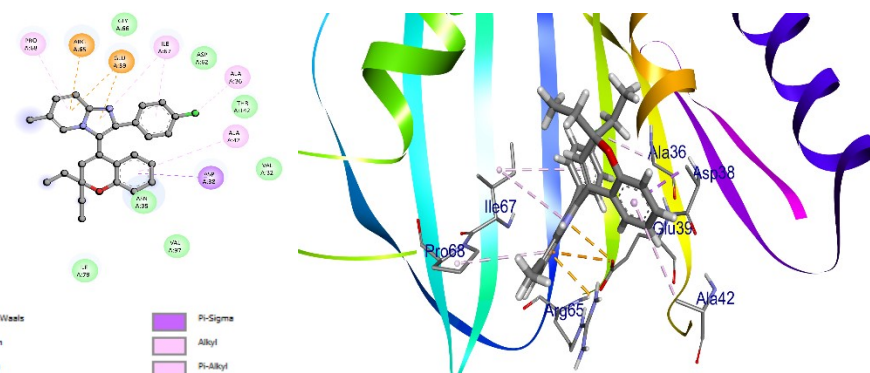

**Fig. S78.** Docking interaction and 3D binding image of compound **16o** with *E. coli* DNA gyrase (PDBID: 1AJ6)

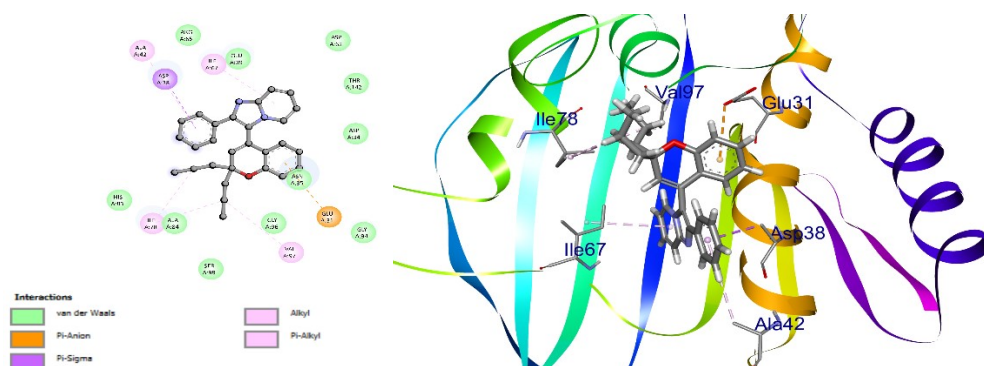

**Fig. S79.** Docking interaction and 3D binding image of compound **16p** with *E. coli* DNA gyrase (PDBID: 1AJ6)

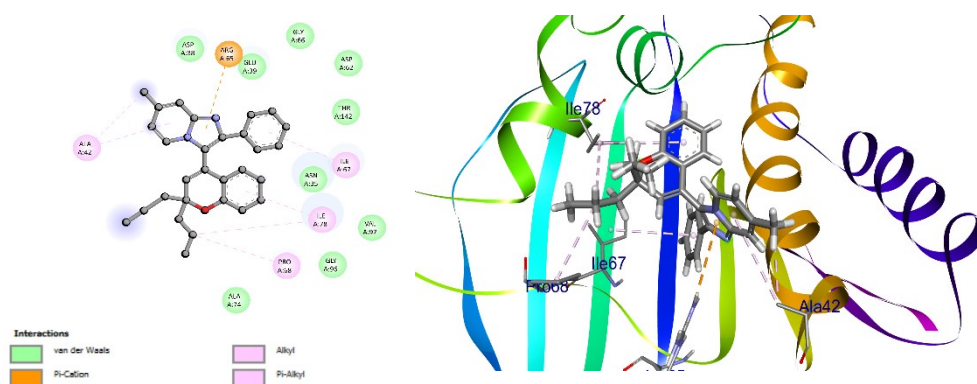

**Fig. S80.** Docking interaction and 3D binding image of compound **16q** with *E. coli* DNA gyrase (PDBID: 1AJ6)

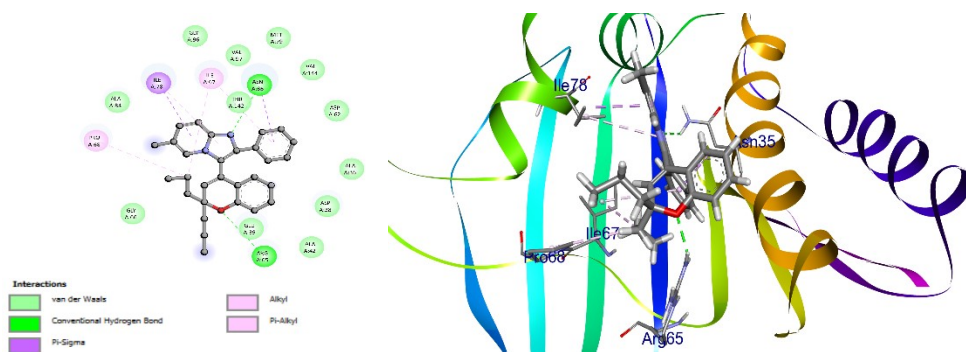

**Fig. S81.** Docking interaction and 3D binding image of compound **16r** with *E. coli* DNA gyrase (PDBID: 1AJ6)

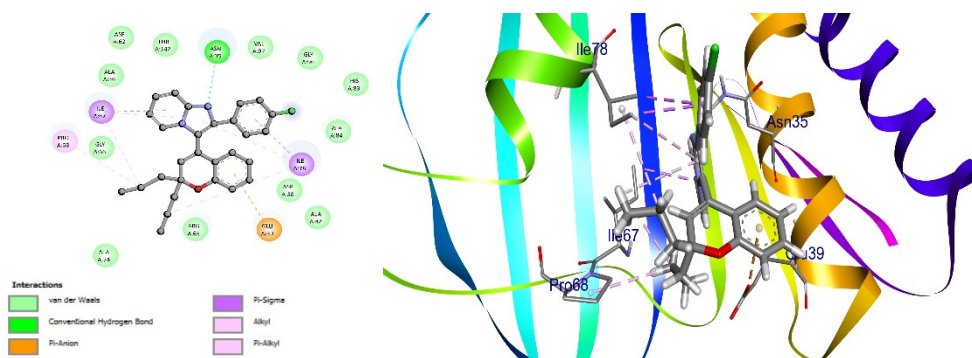

**Fig. S82.** Docking interaction and 3D binding image of compound **16s** with *E. coli* DNA gyrase (PDBID: 1AJ6)

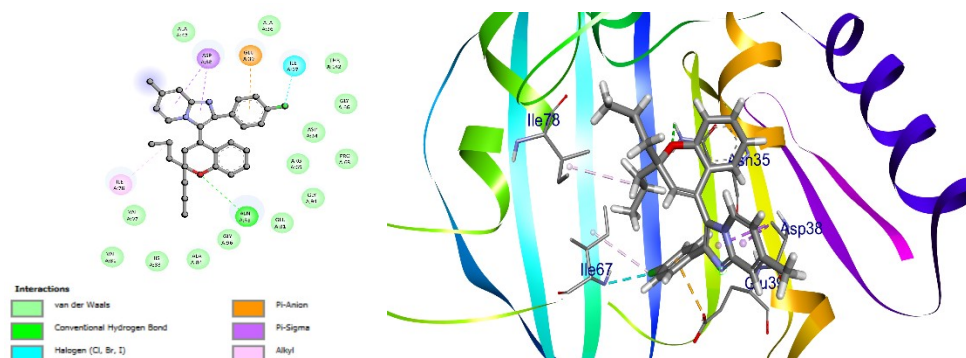

**Fig. S83.** Docking interaction and 3D binding image of compound **16t** with *E. coli* DNA gyrase (PDBID: 1AJ6)

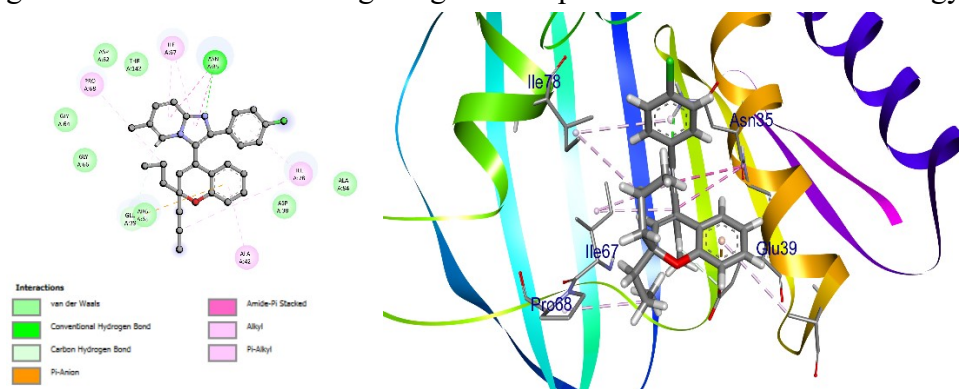

**Fig. S84.** Docking interaction and 3D binding image of compound **16u** with *E. coli* DNA gyrase (PDBID: 1AJ6)

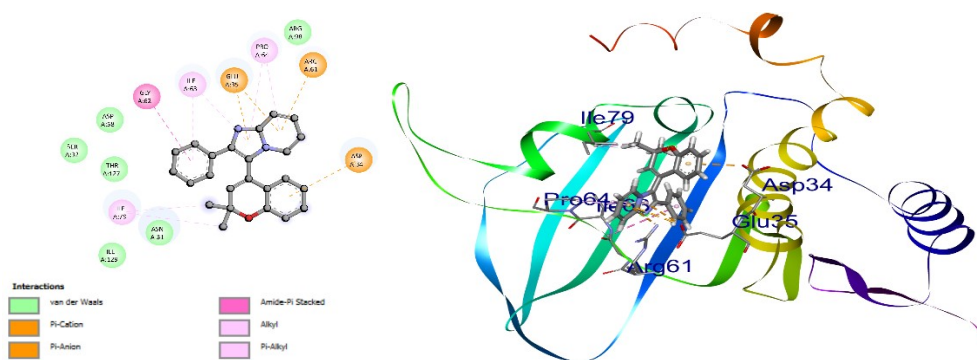

**Fig. S85.** Docking interaction and 3D binding image of compound **16a** with *S. aureus* DNA gyrase (PDBID: 3G7B)

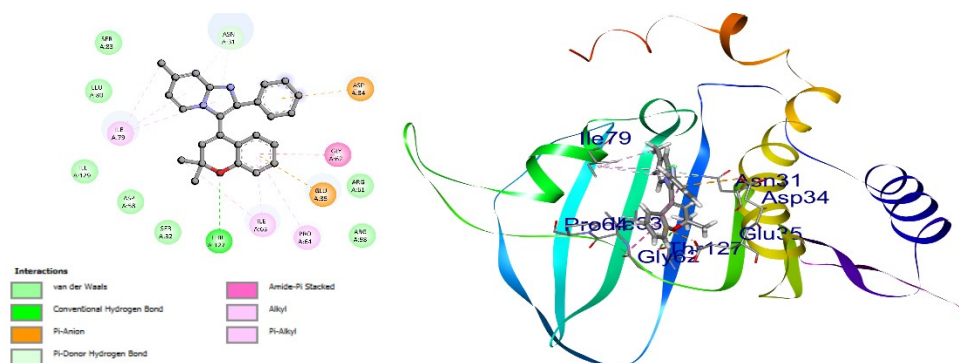

**Fig. S86.** Docking interaction and 3D binding image of compound **16b** with *S. aureus* DNA gyrase (PDBID: 3G7B)

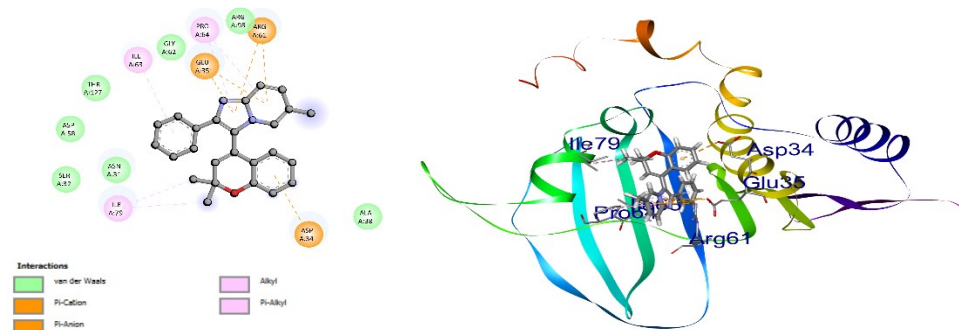



**Fig. S87.** Docking interaction and 3D binding image of compound **16c** with *S. aureus* DNA gyrase (PDBID: 3G7B)

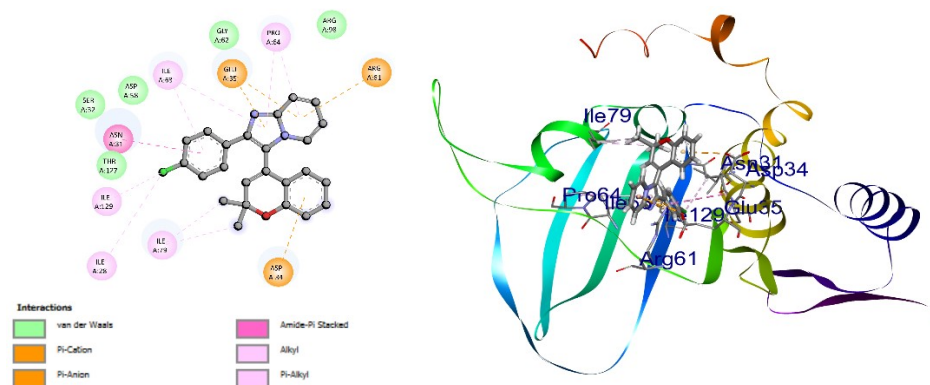

**Fig. S88.** Docking interaction and 3D binding image of compound **16d** with *S. aureus* DNA gyrase (PDBID: 3G7B)

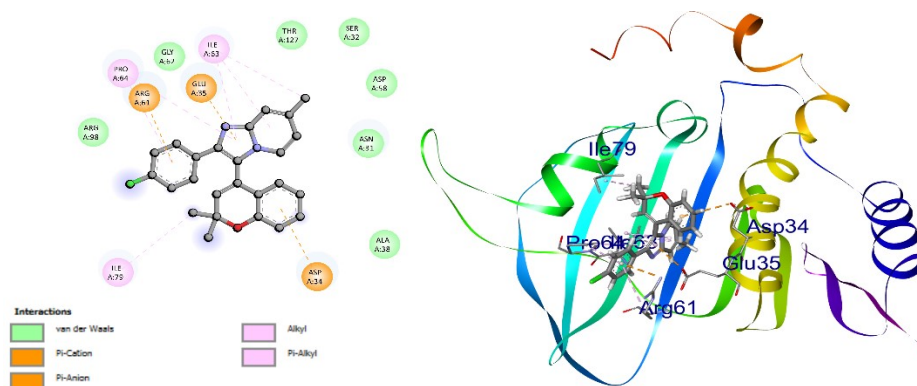

**Fig. S89.** Docking interaction and 3D binding image of compound **16e** with *S. aureus* DNA gyrase (PDBID: 3G7B)

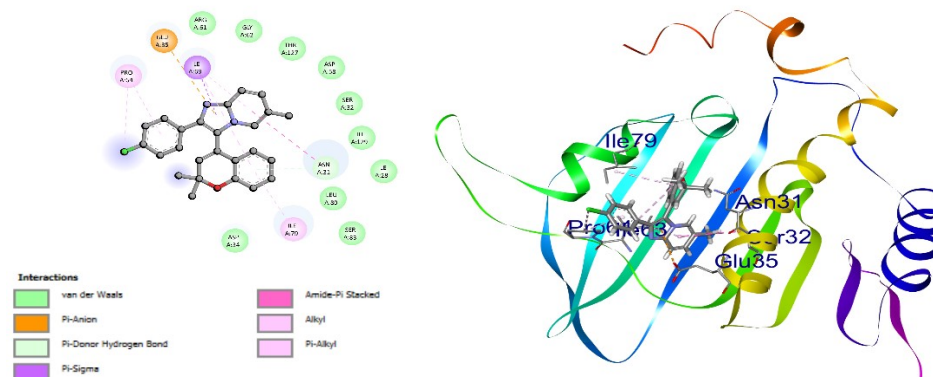

**Fig. S90.** Docking interaction and 3D binding image of compound **16f** with *S. aureus* DNA gyrase (PDBID: 3G7B)

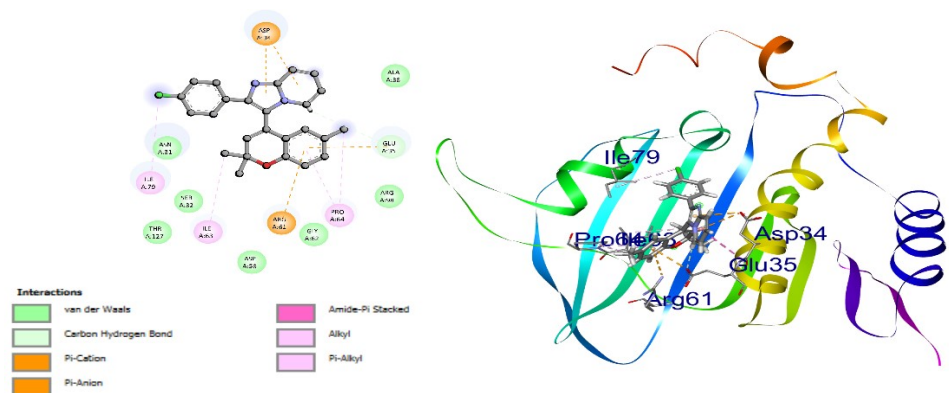

**Fig. S91.** Docking interaction and 3D binding image of compound **16g** with *S. aureus* DNA gyrase (PDBID: 3G7B)

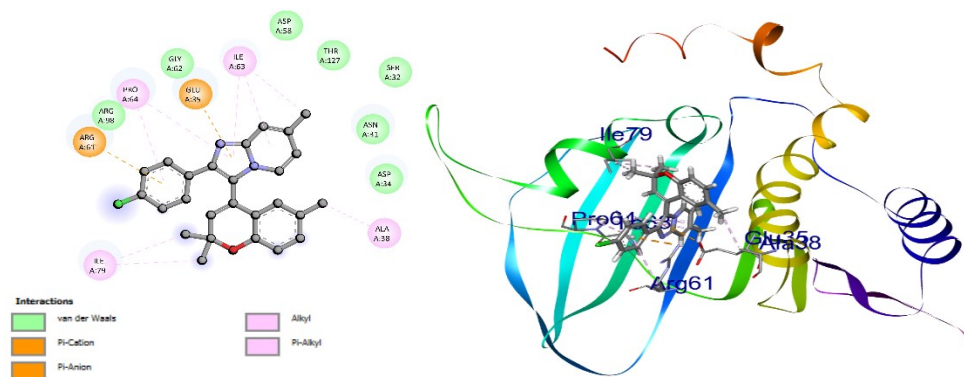

**Fig. S92.** Docking interaction and 3D binding image of compound **16h** with *S. aureus* DNA gyrase (PDBID: 3G7B)

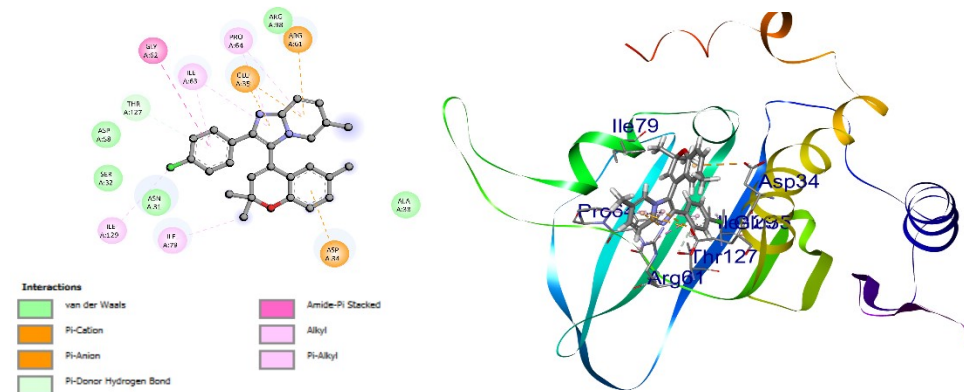

**Fig. S93.** Docking interaction and 3D binding image of compound **16i** with *S. aureus* DNA gyrase (PDBID: 3G7B)

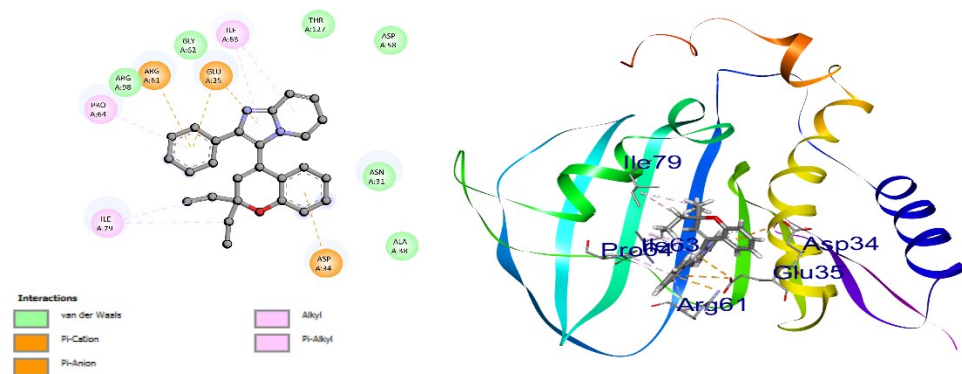

**Fig. S94.** Docking interaction and 3D binding image of compound **16j** with *S. aureus* DNA gyrase (PDBID: 3G7B)

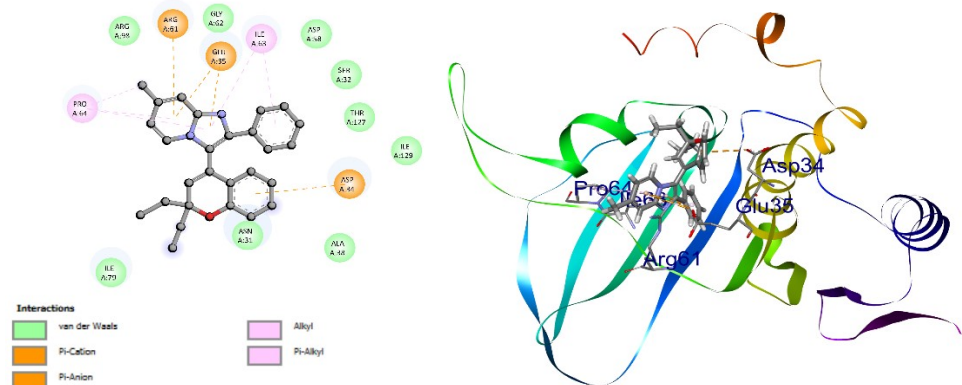

**Fig. S95.** Docking interaction and 3D binding image of compound **16k** with *S. aureus* DNA gyrase (PDBID: 3G7B)

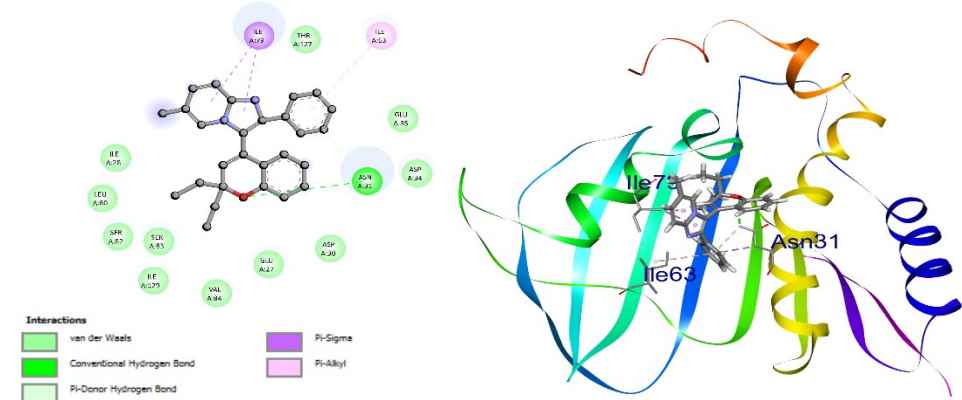



**Fig. S99.** Docking interaction and 3D binding image of compound **16o** with *S. aureus* DNA gyrase (PDBID: 3G7B)

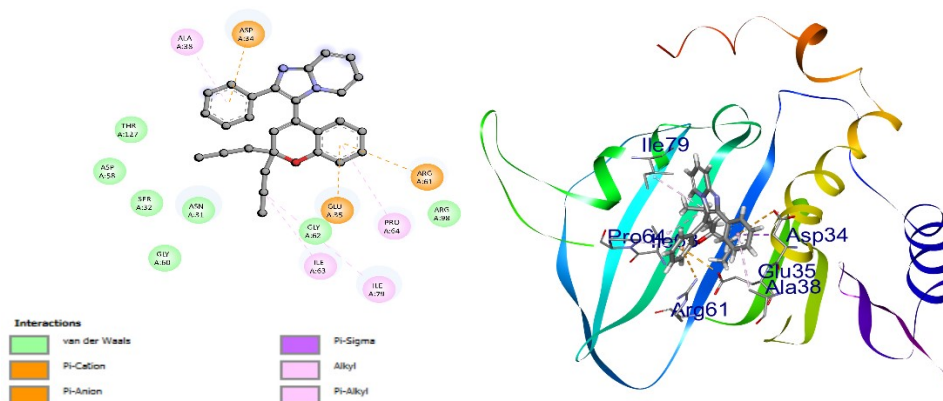

**Fig. S100.** Docking interaction and 3D binding image of compound **16p** with *S. aureus* DNA gyrase (PDBID: 3G7B)

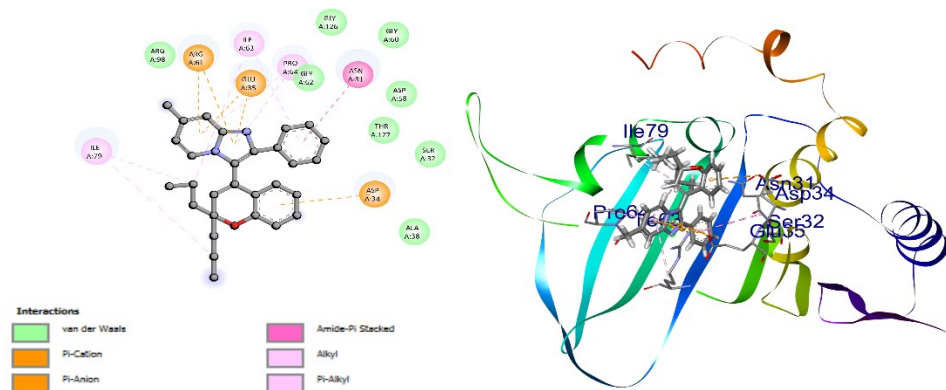

**Fig. S101.** Docking interaction and 3D binding image of compound **16q** with *S. aureus* DNA gyrase (PDBID: 3G7B)

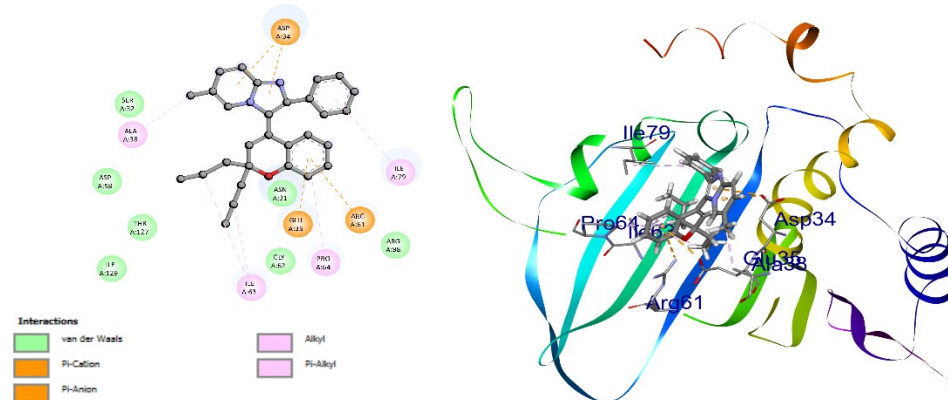

**Fig. S102.** Docking interaction and 3D binding image of compound **16r** with *S. aureus* DNA gyrase (PDBID: 3G7B)

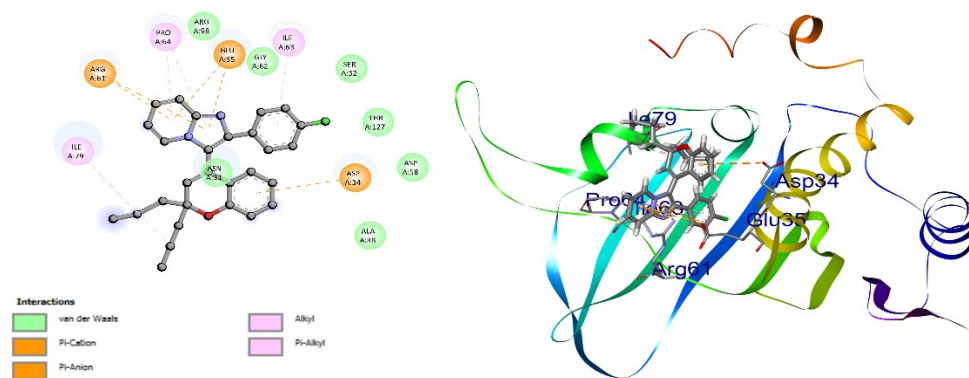

**Fig. S103.** Docking interaction and 3D binding image of compound **16s** with *S. aureus* DNA gyrase (PDBID: 3G7B)

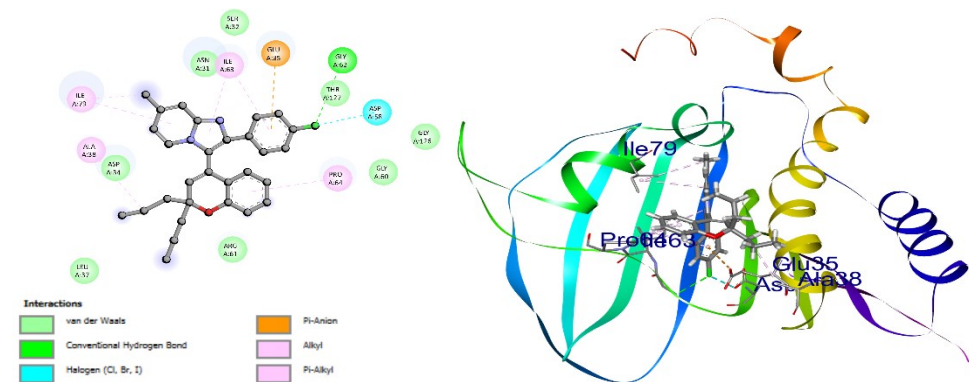

**Fig. S104.** Docking interaction and 3D binding image of compound **16t** with *S. aureus* DNA gyrase (PDBID: 3G7B)

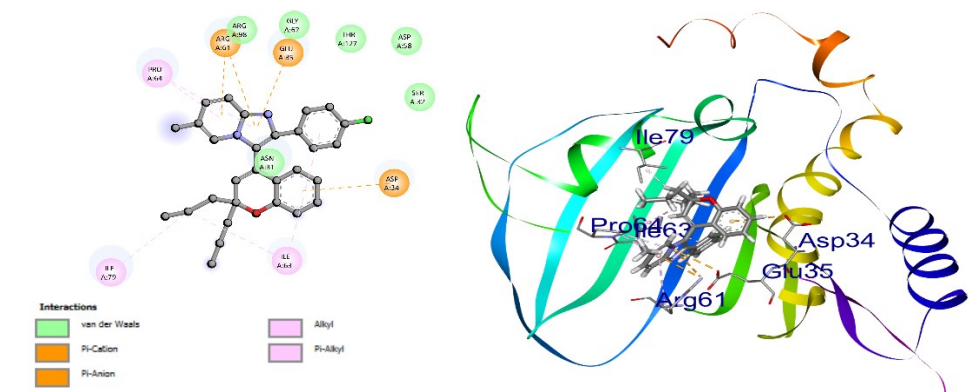

**Fig. S105.** Docking interaction and 3D binding image of compound **16u** with *S. aureus* DNA gyrase (PDBID: 3G7B)
